# Supplementary material for: One-pot synthesis of benzoxazoles via the metal-free ortho-C–H functionalization of phenols with nitroalkanes
Source: Royal Society of Chemistry journal article supplement (doi:10.1039/c5ra15128g), 2015-01-01
Supplement: c5ra15128g1.pdf [file c5ra15128g1.pdf]

# One-pot synthesis of benzoxazoles via the metal-free *ortho*-C-H functionalization of phenols with nitroalkanes

Nicolai A. Aksenov, Alexander V. Aksenov,\* Oleg N. Nadein, Dmitrii A. Aksenov, Alexander N. Smirnov, and Michael Rubin\*

## Supporting Information

### Table of Contents

|                                                                   |           |
|-------------------------------------------------------------------|-----------|
| <b><sup>1</sup>H and <sup>13</sup>C NMR Spectral Charts .....</b> | <b>2</b>  |
| <b>HRMS (ES TOF) Spectral Charts.....</b>                         | <b>38</b> |
| <b>ORTEP Drawings of Crystal Structures.....</b>                  | <b>45</b> |

# <sup>1</sup>H and <sup>13</sup>C NMR Spectral Charts

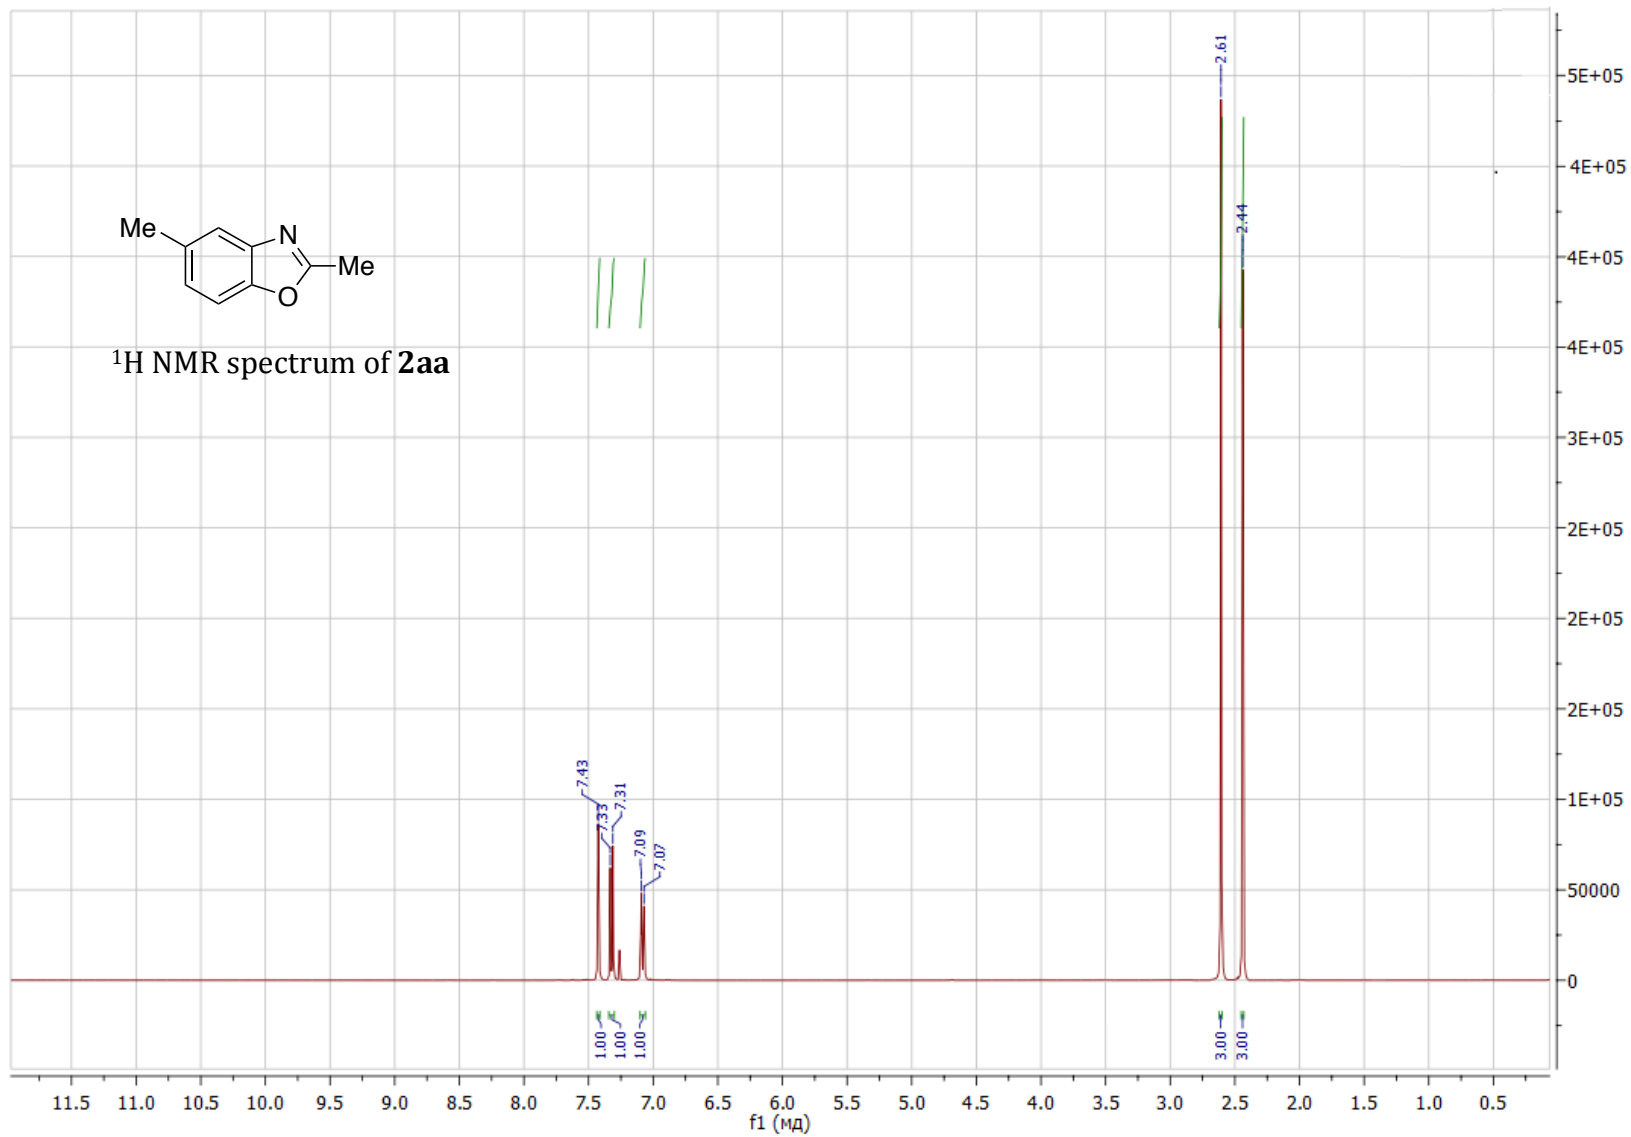

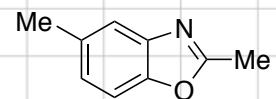

<sup>13</sup>C NMR spectrum of **2aa**

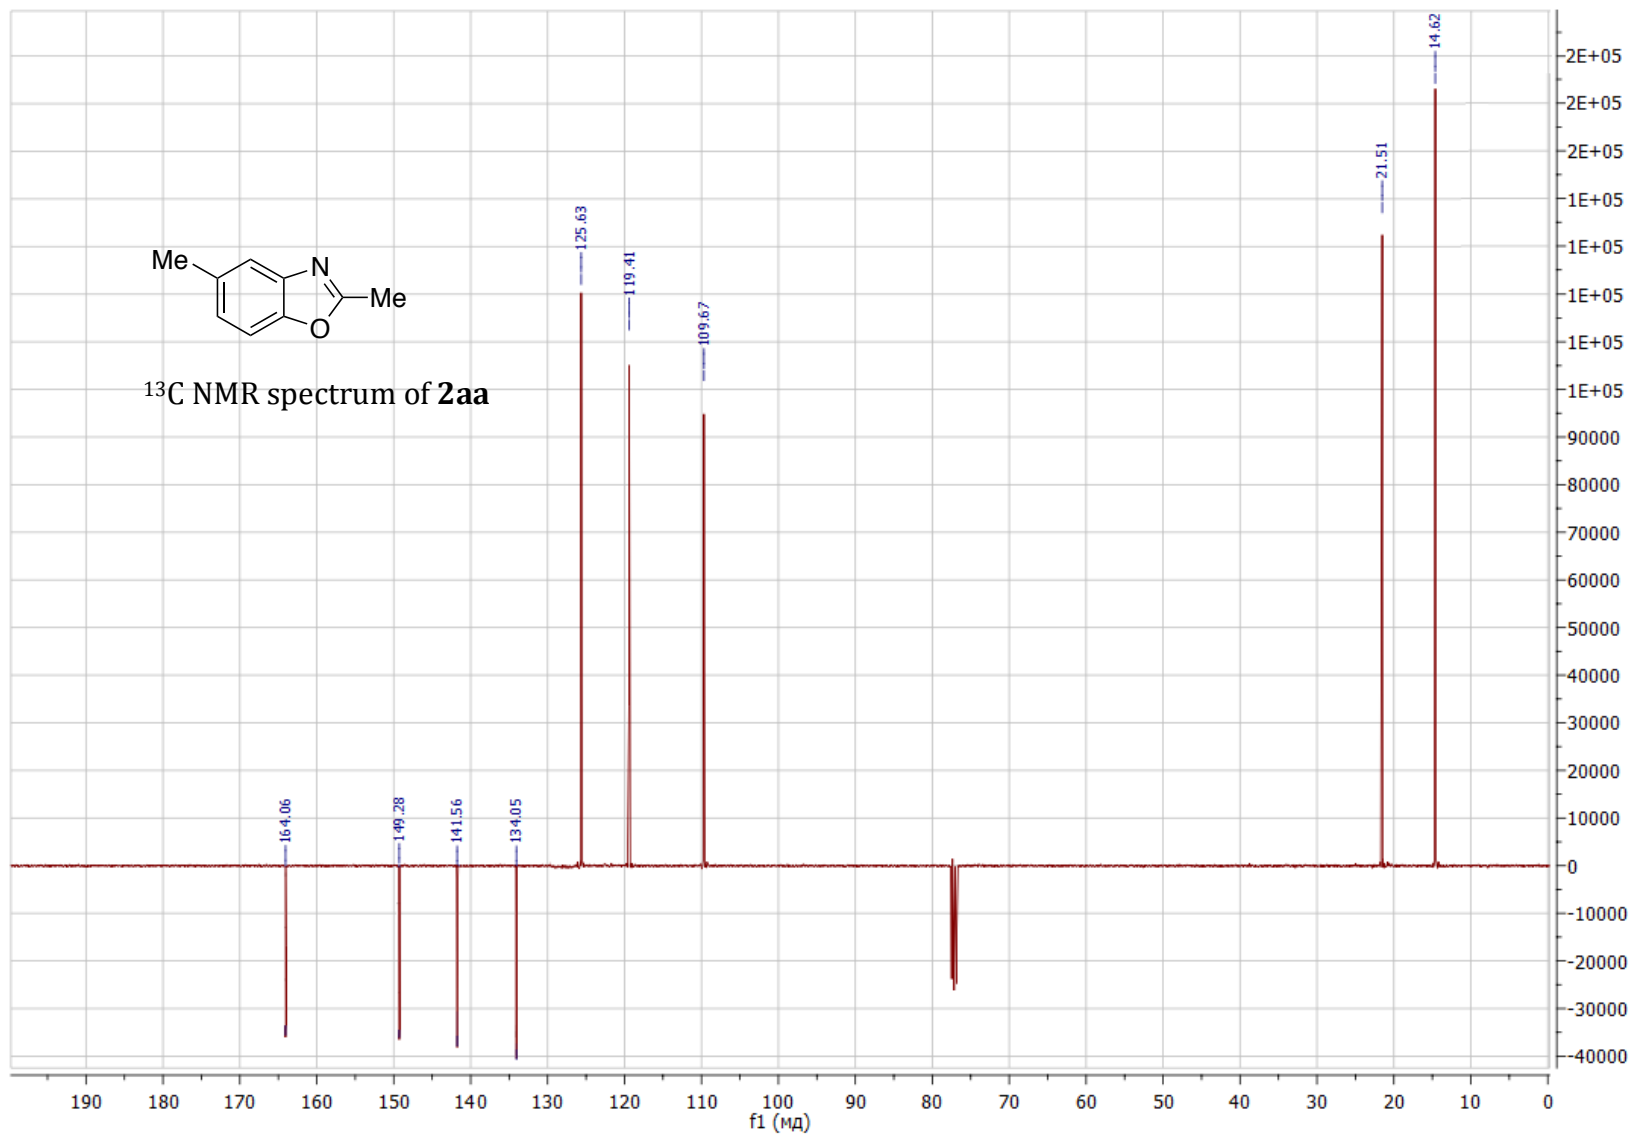

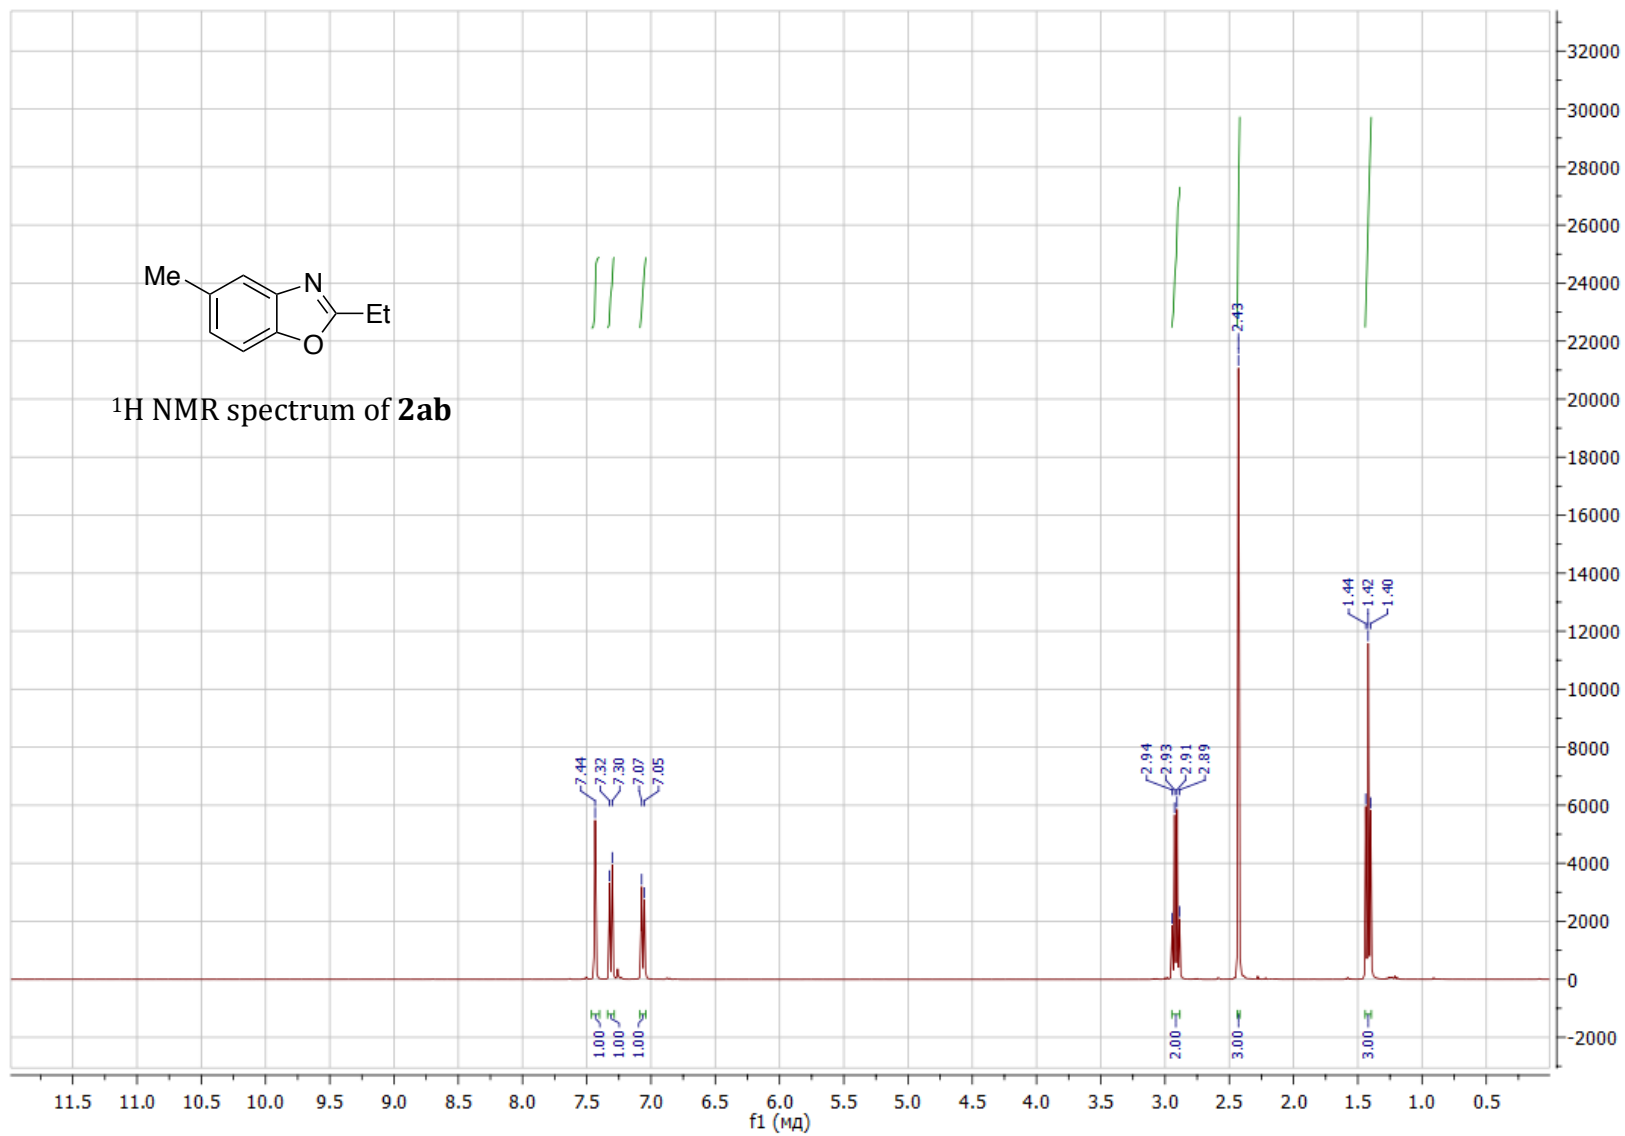

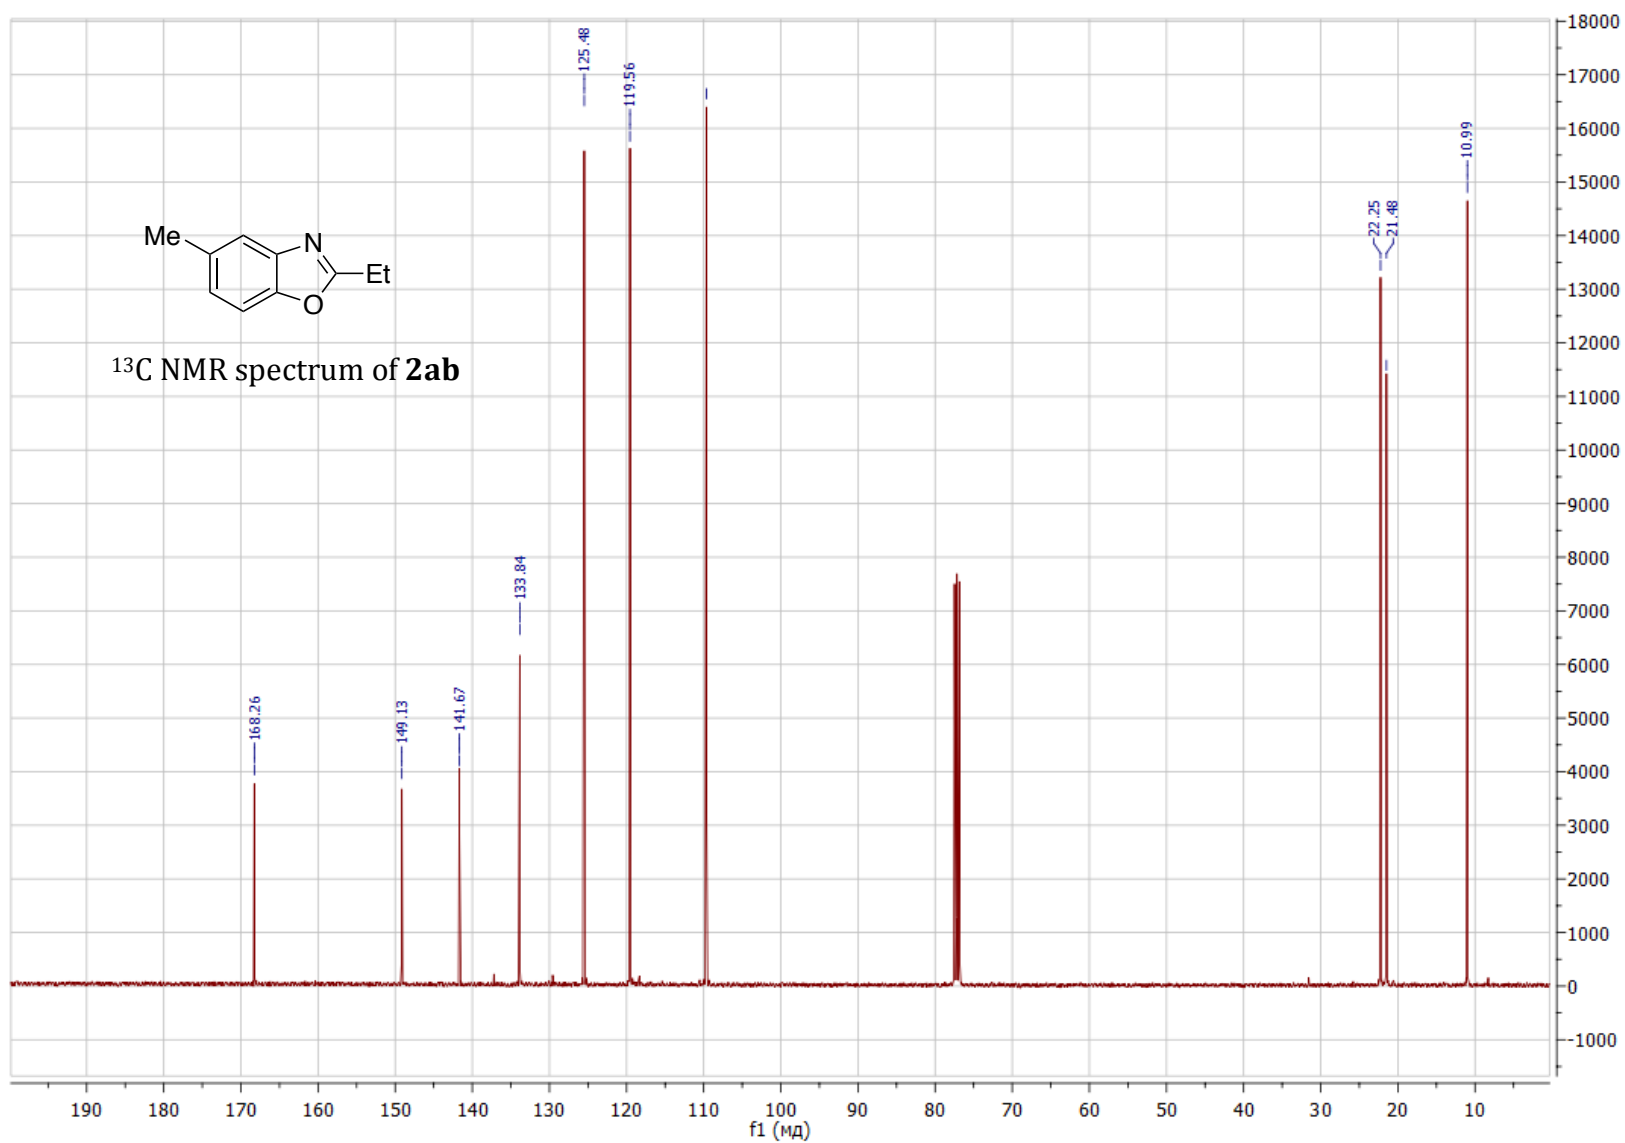

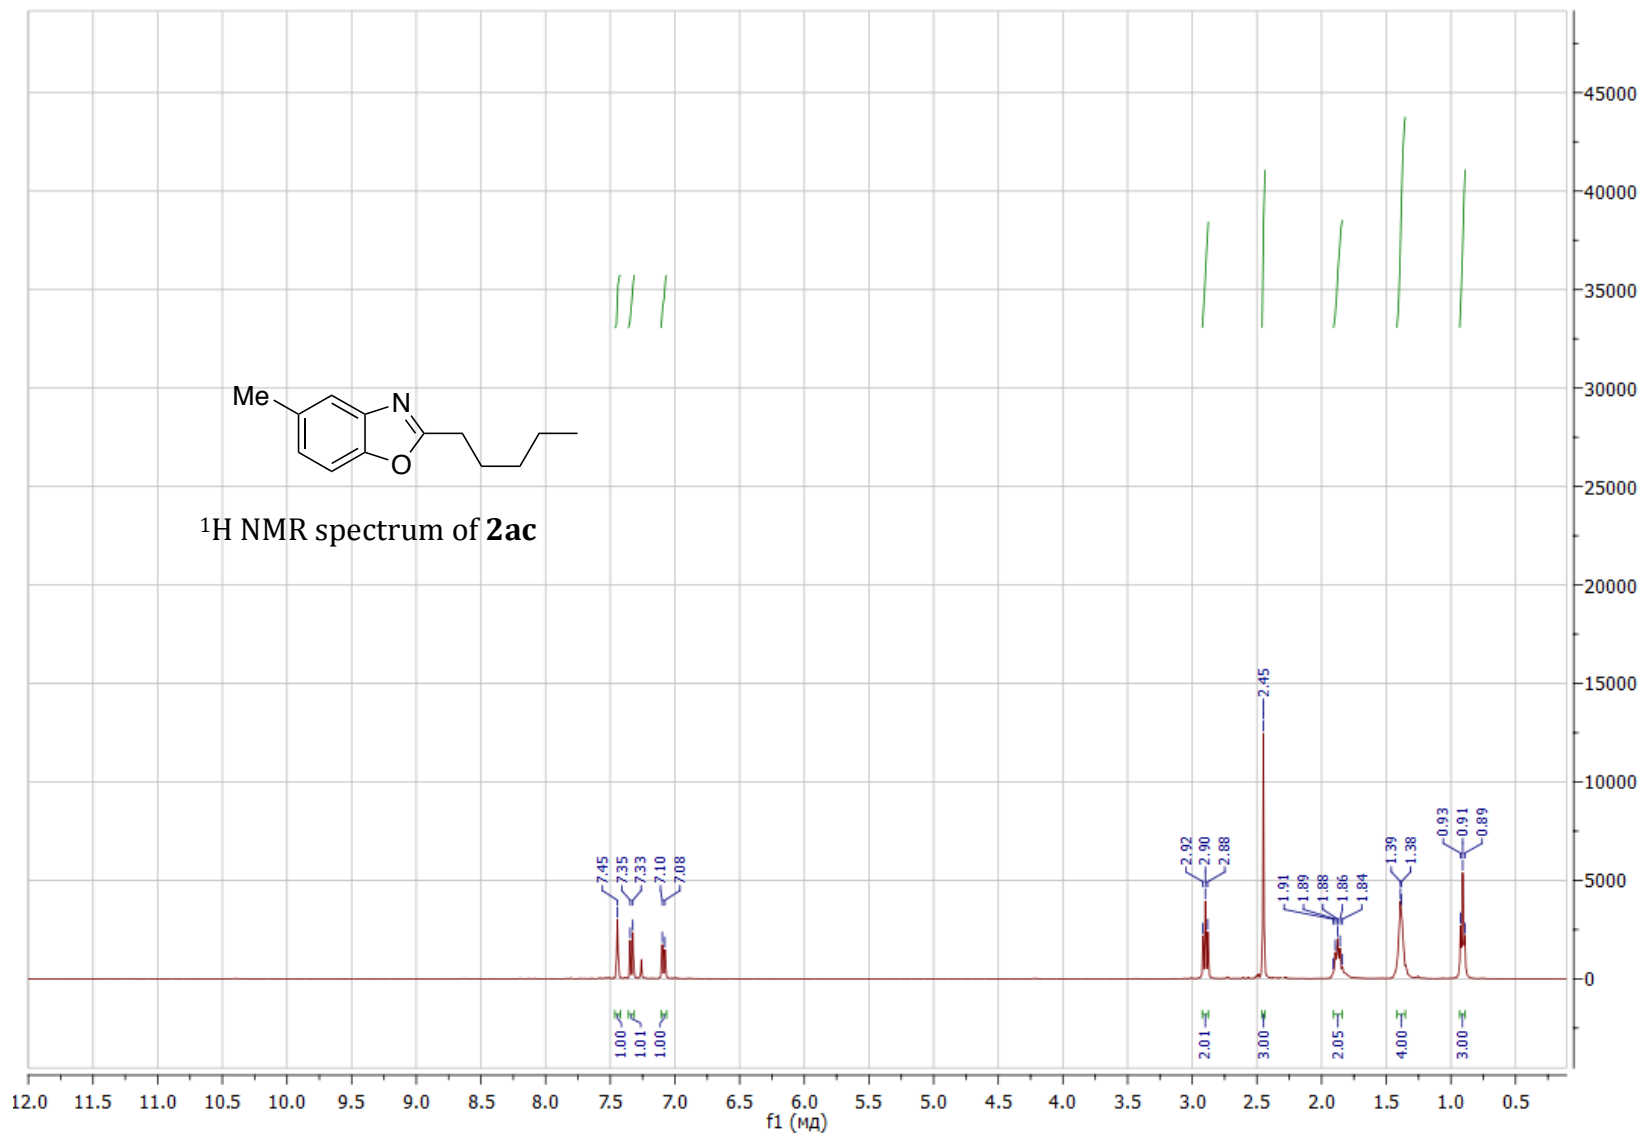

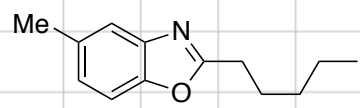

$^{13}\text{C}$  NMR spectrum of **2ac**

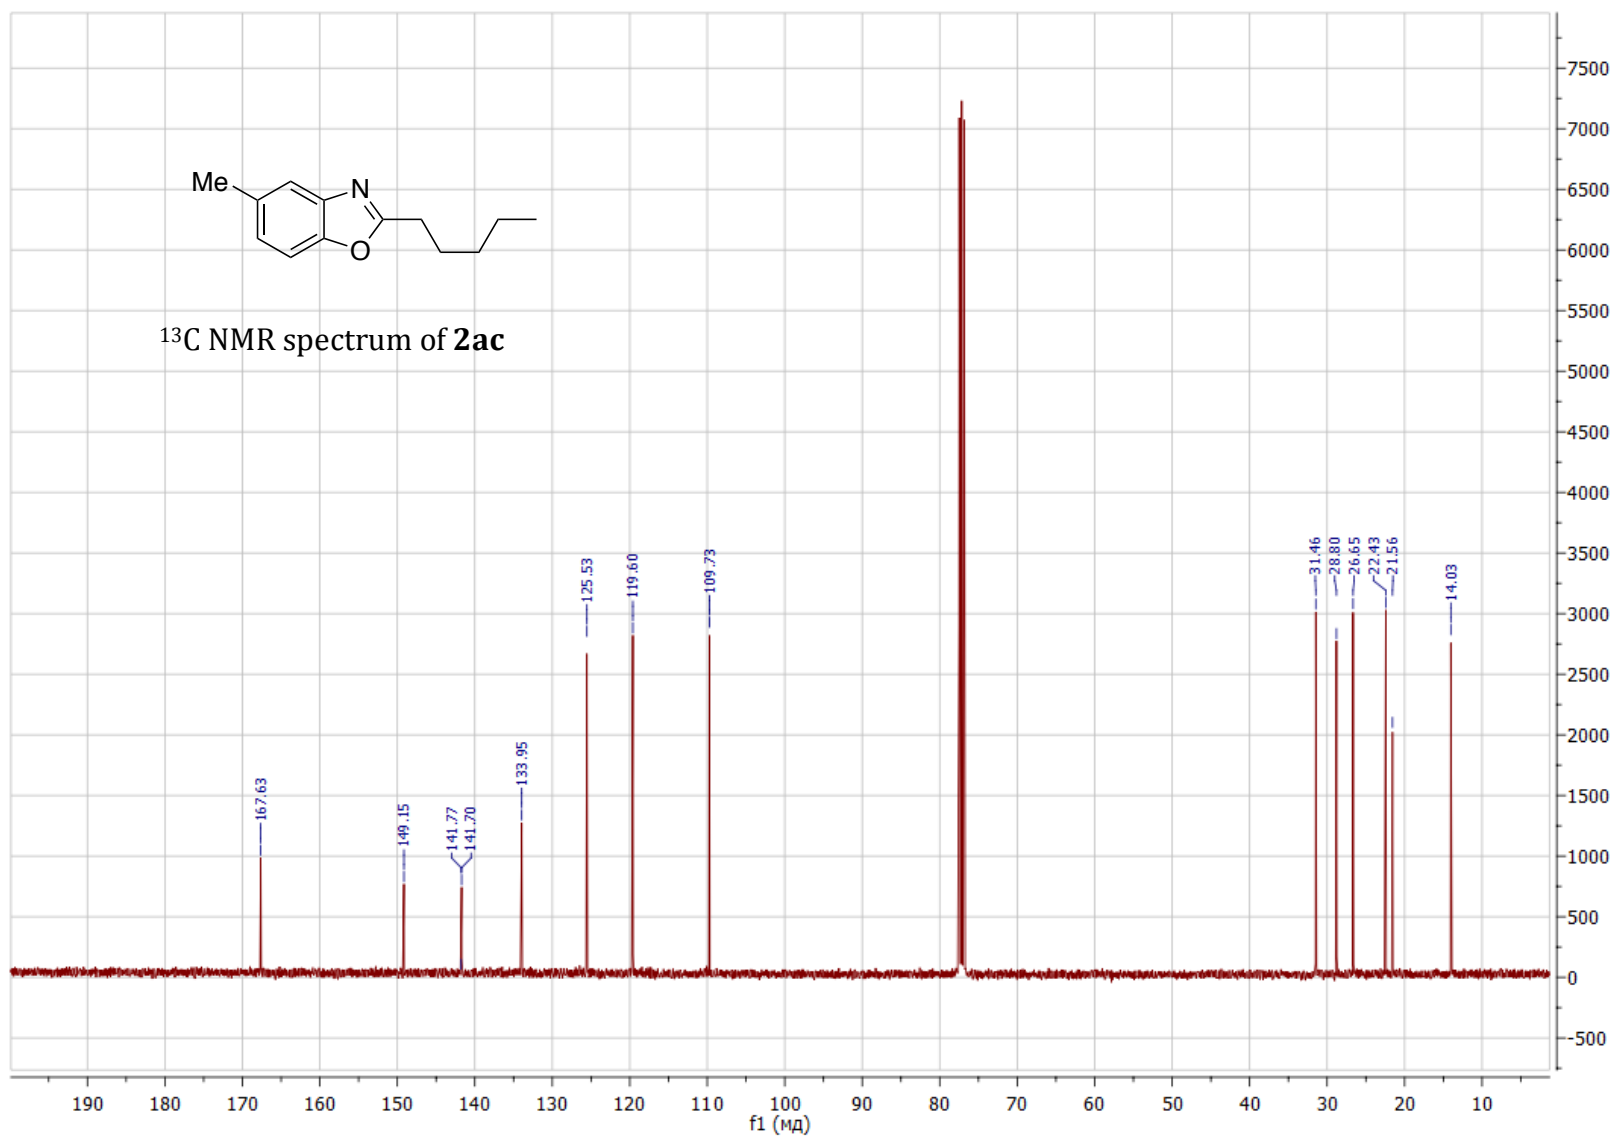

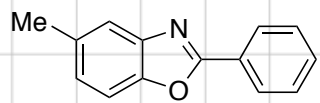

<sup>1</sup>H NMR spectrum of **2ad**

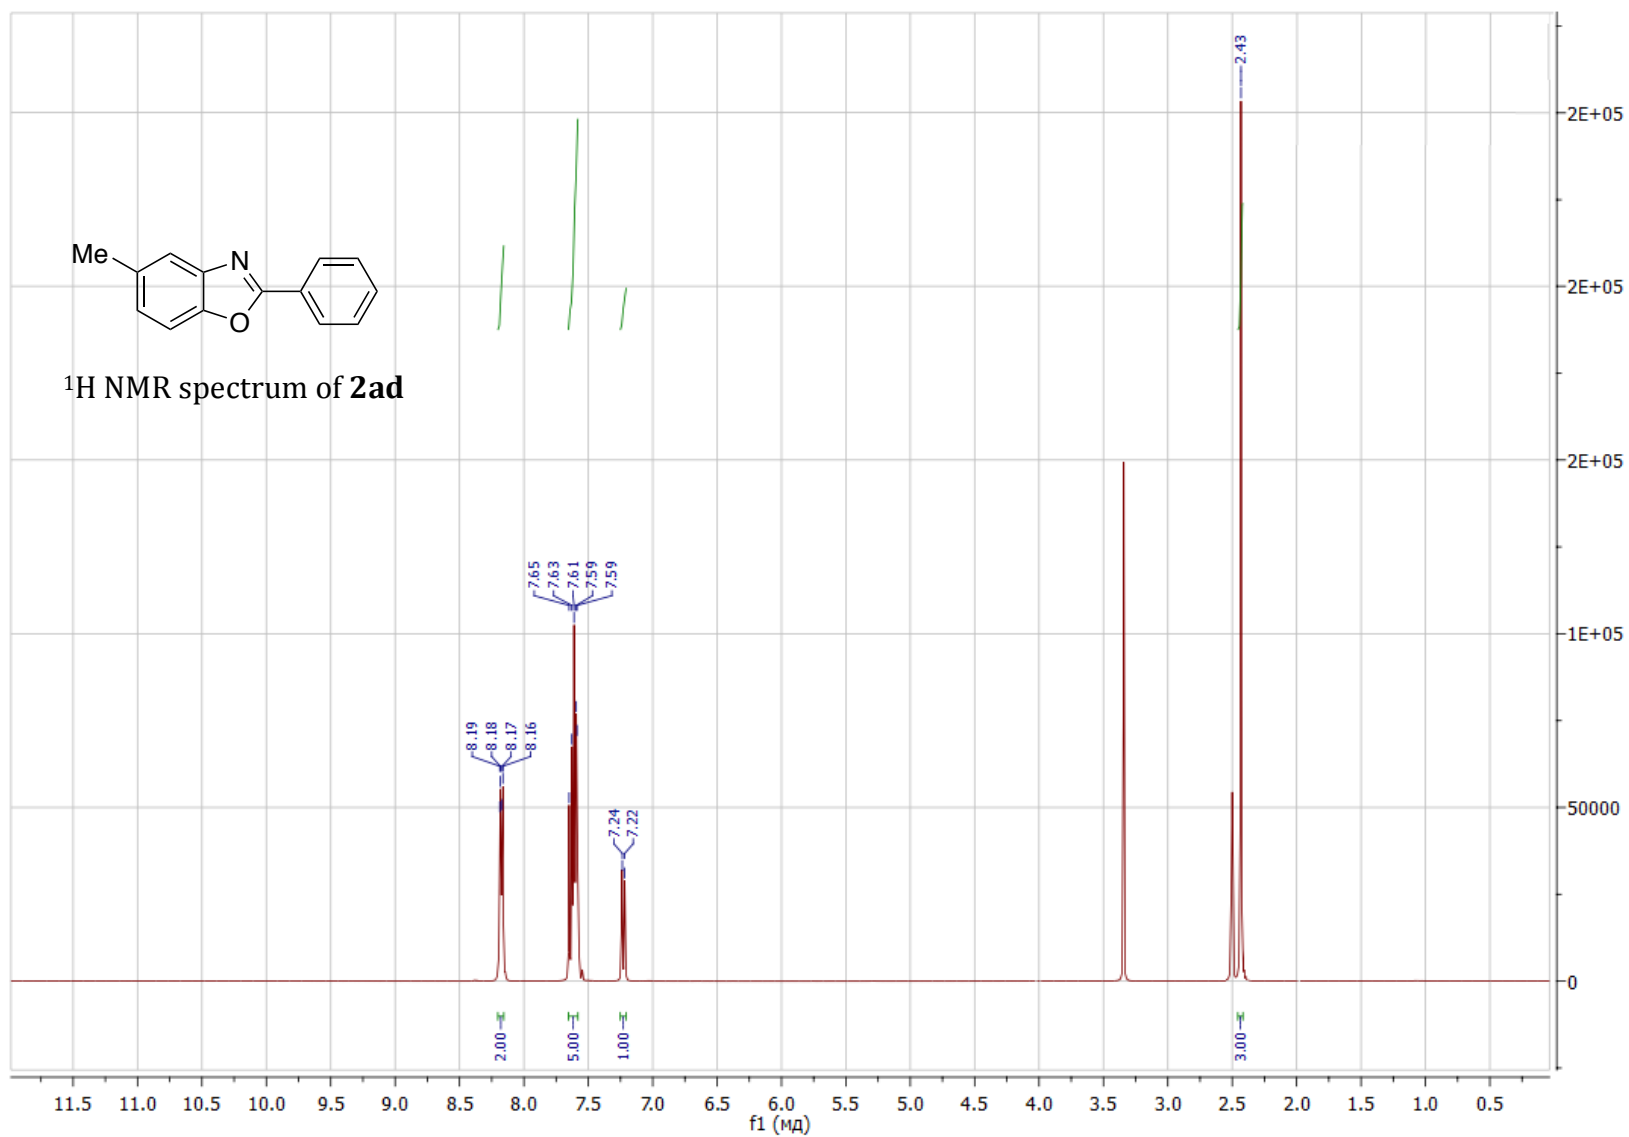



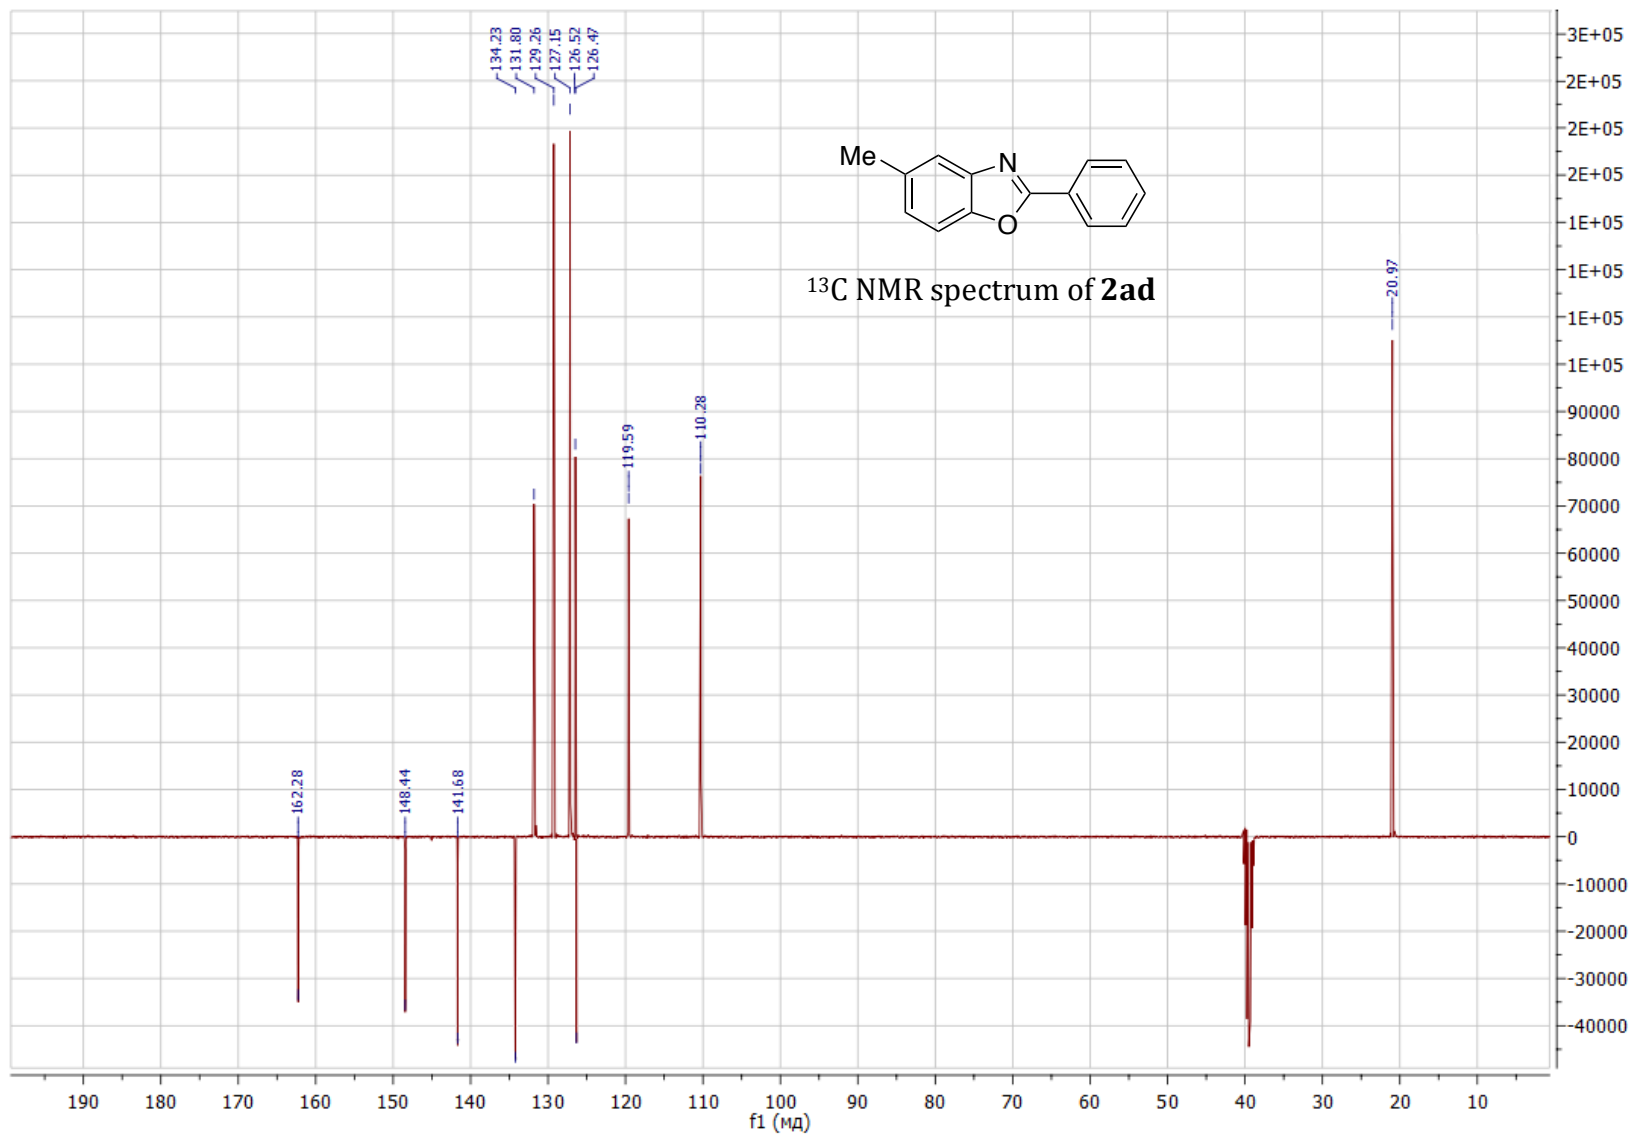

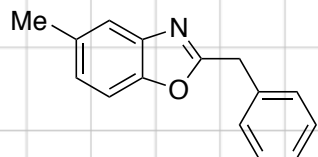

$^1\text{H}$  NMR spectrum of **2ae**

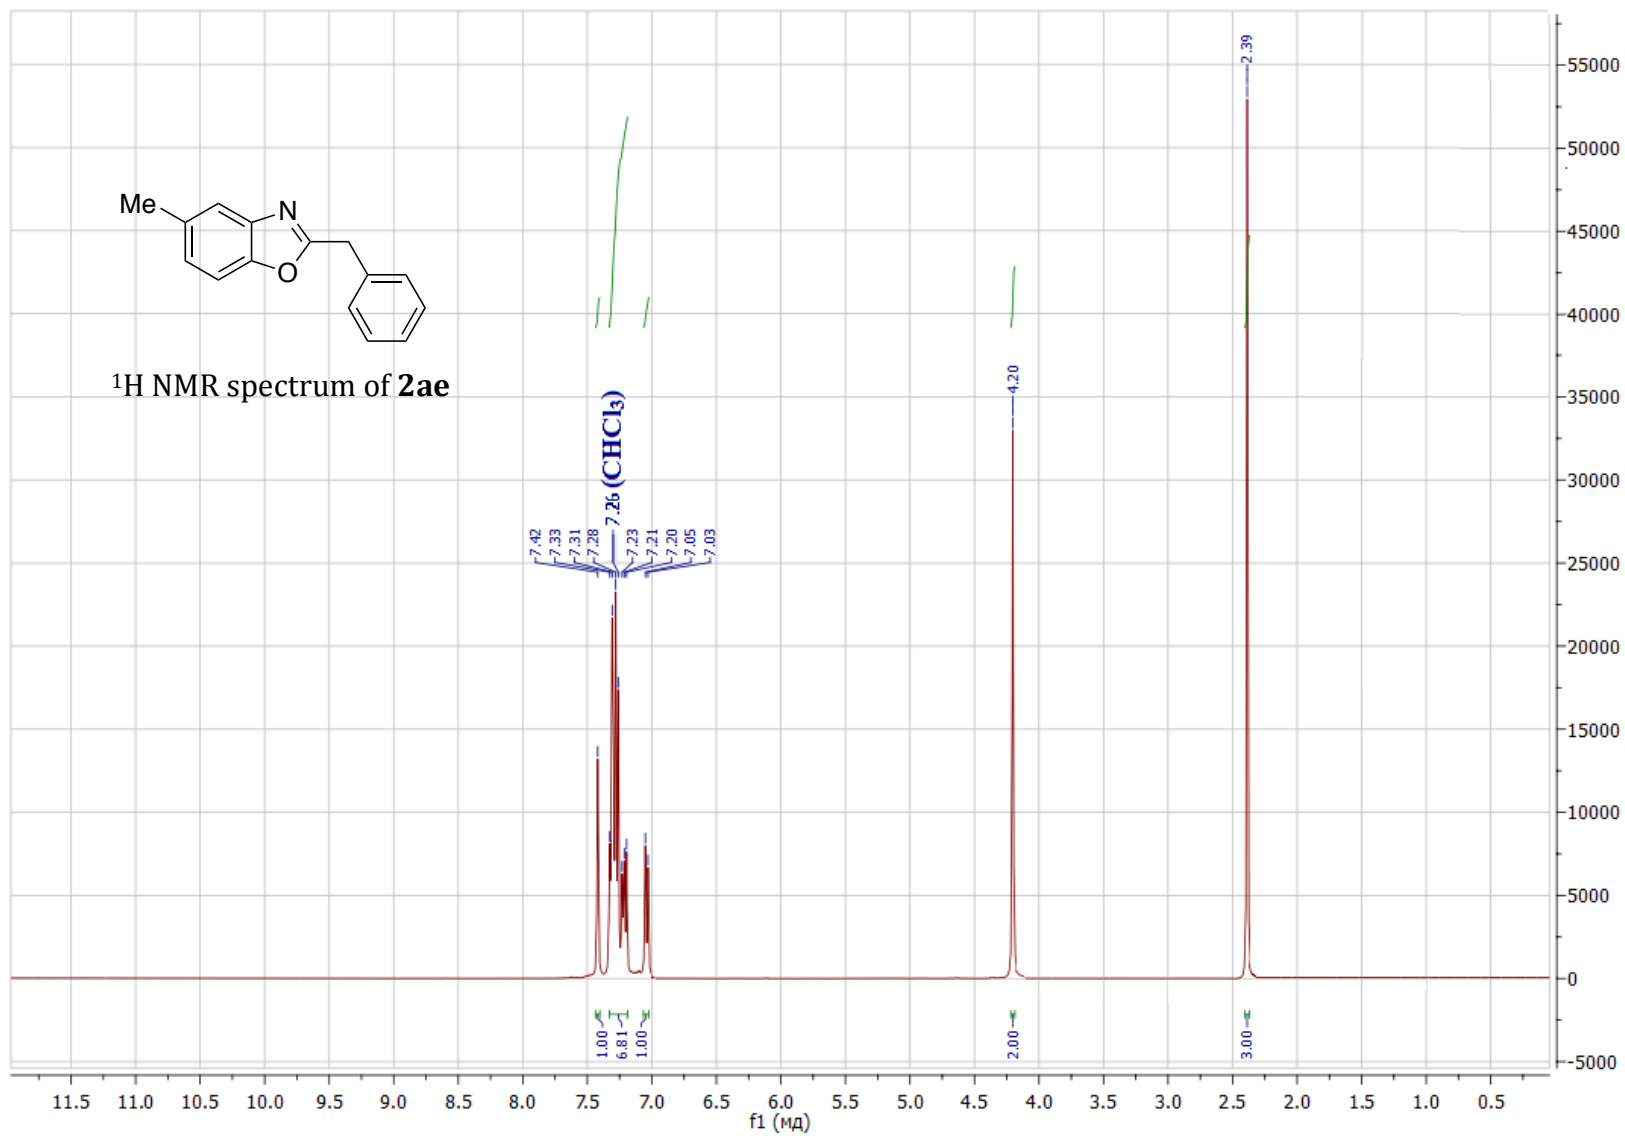

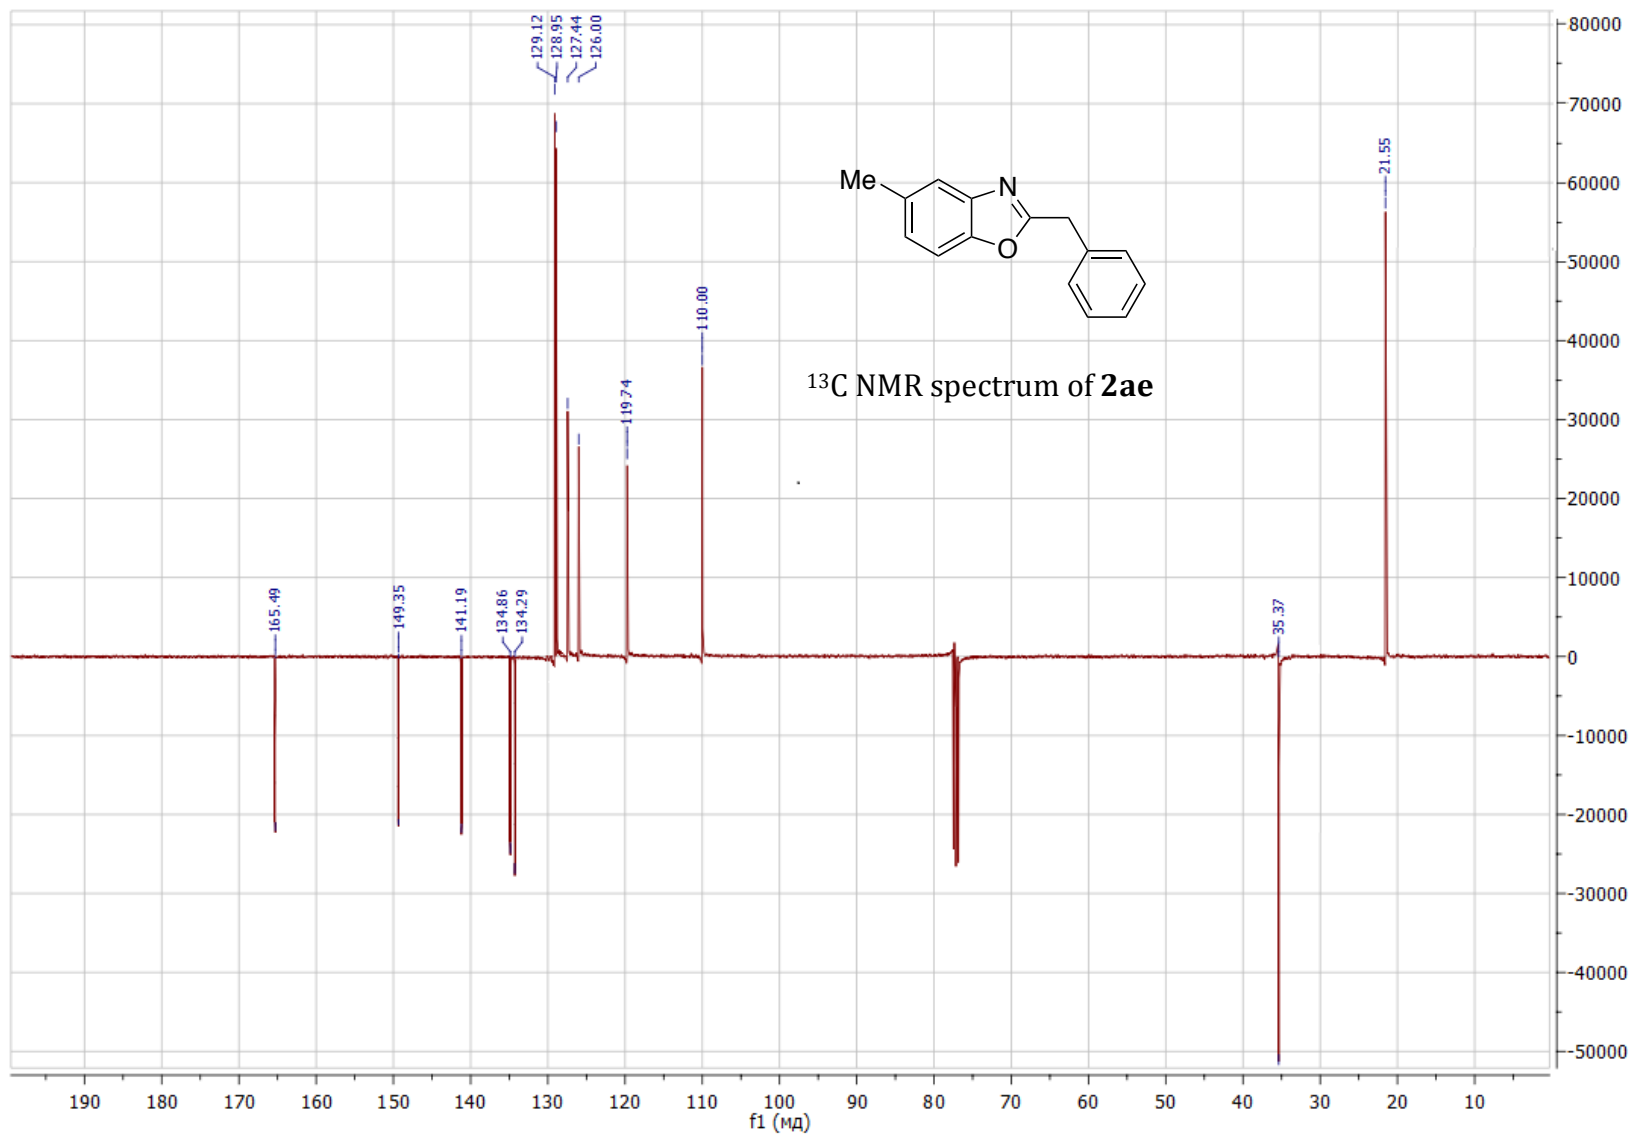

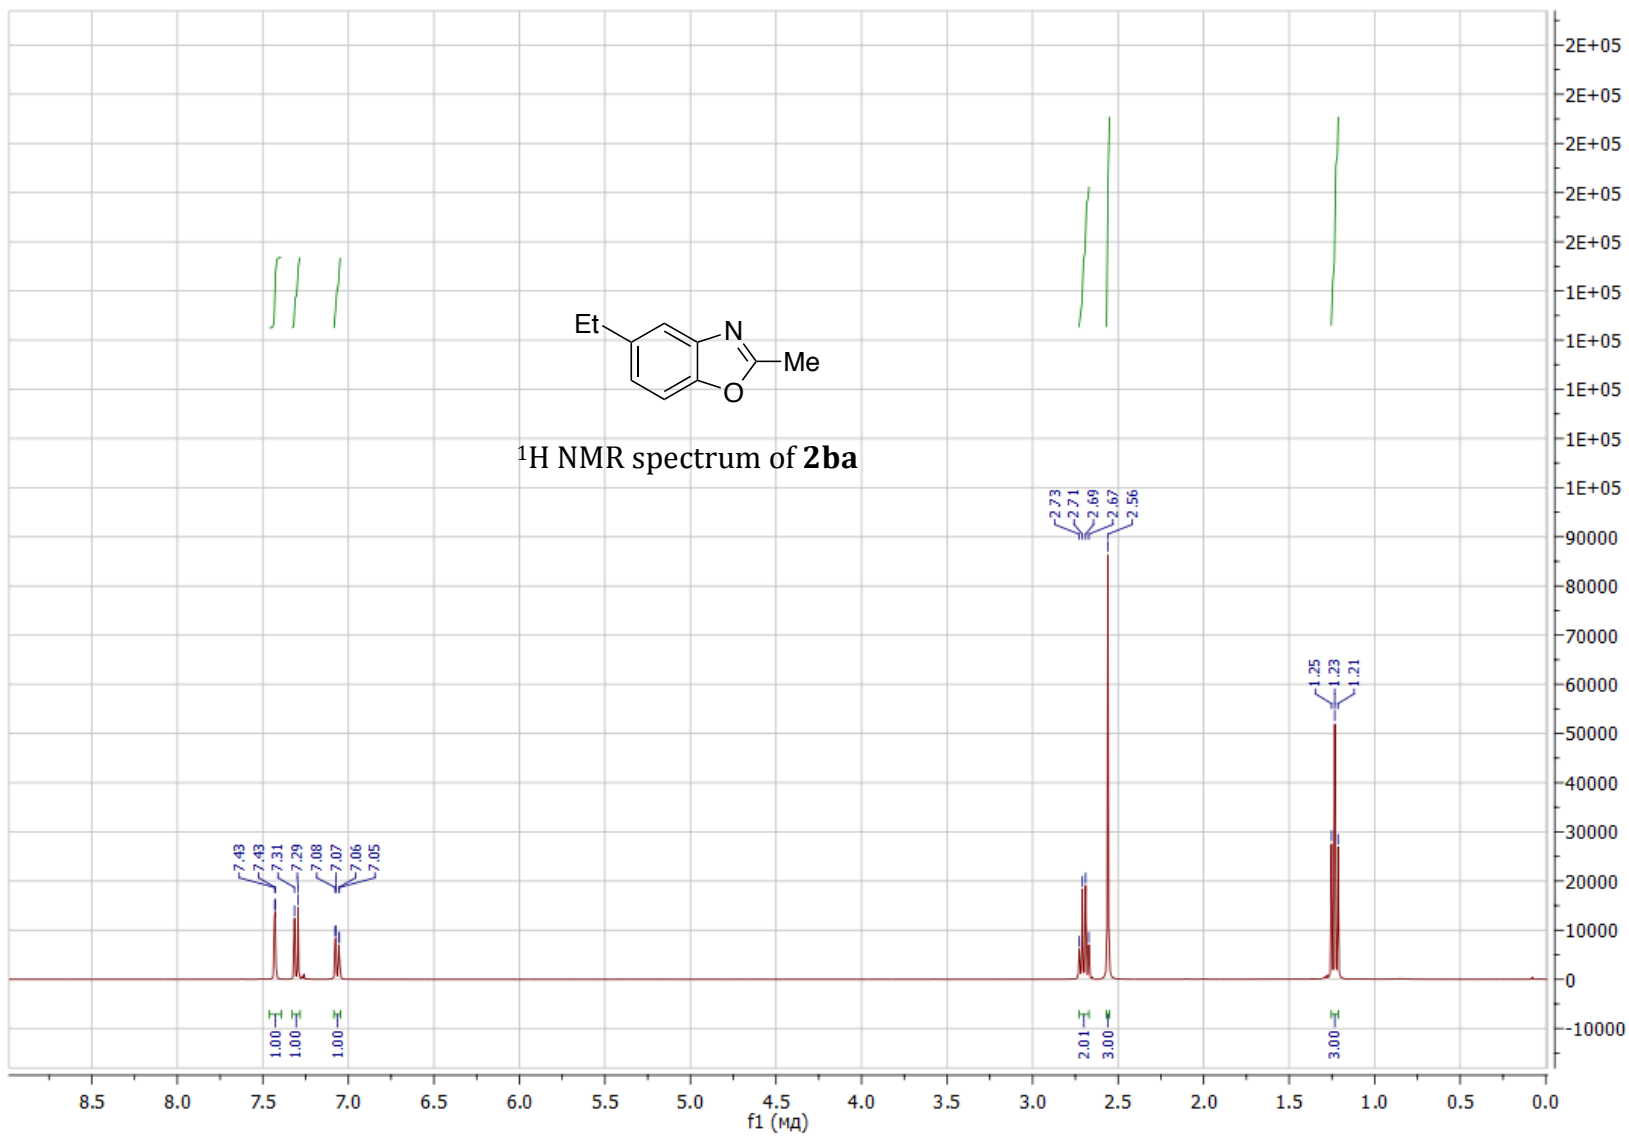

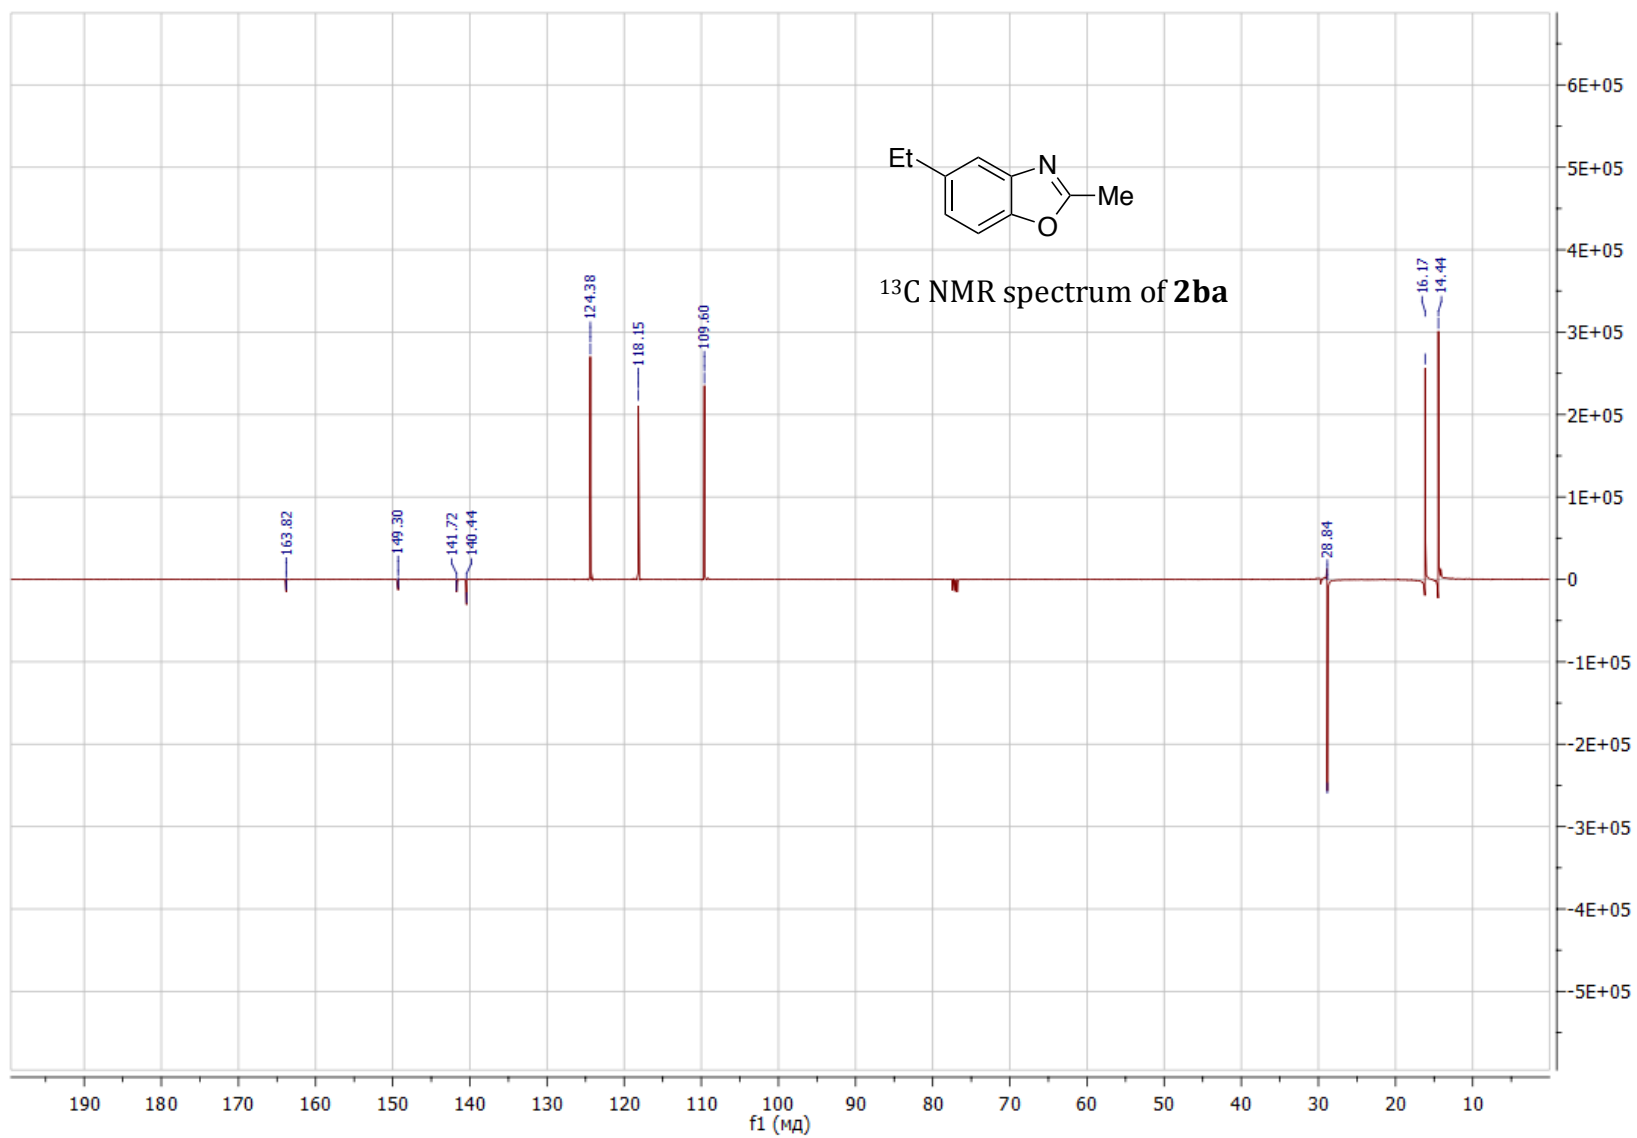

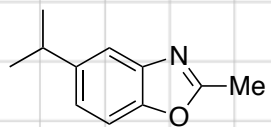

$^1\text{H}$  NMR spectrum of **2ca**

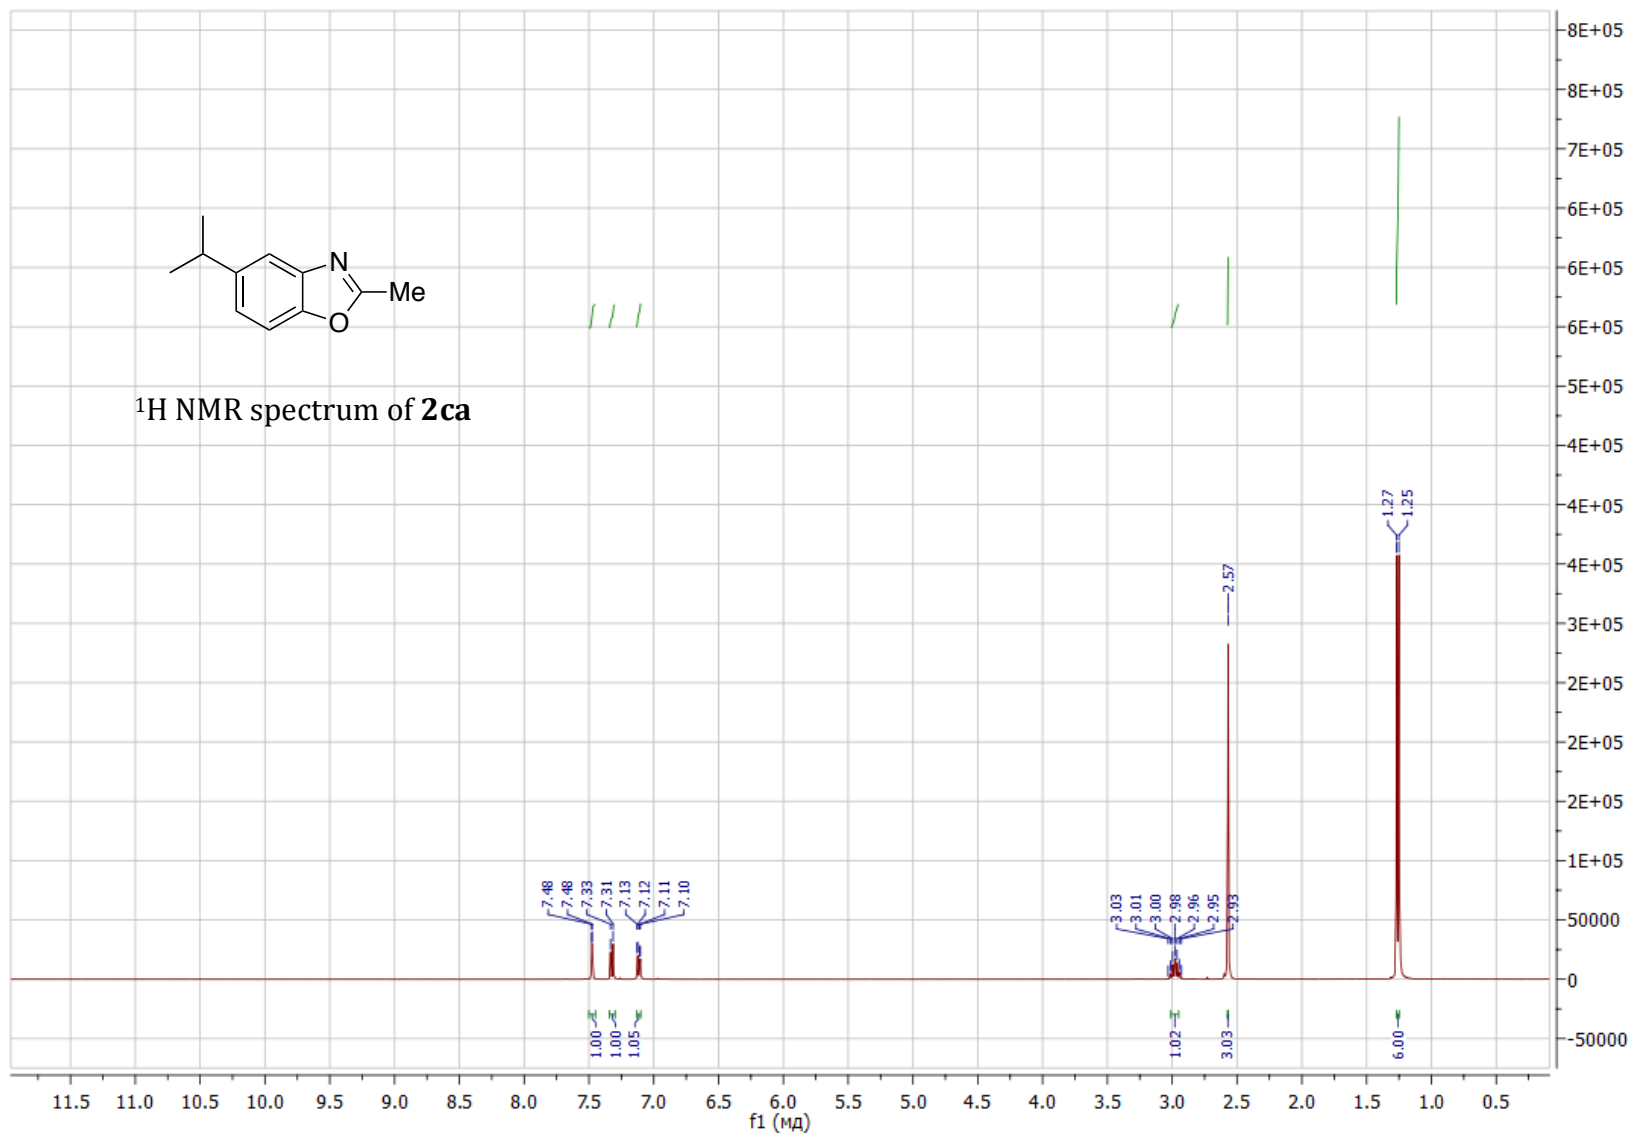

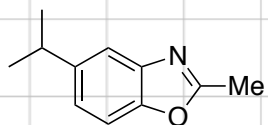

$^{13}\text{C}$  NMR spectrum of **2ca**

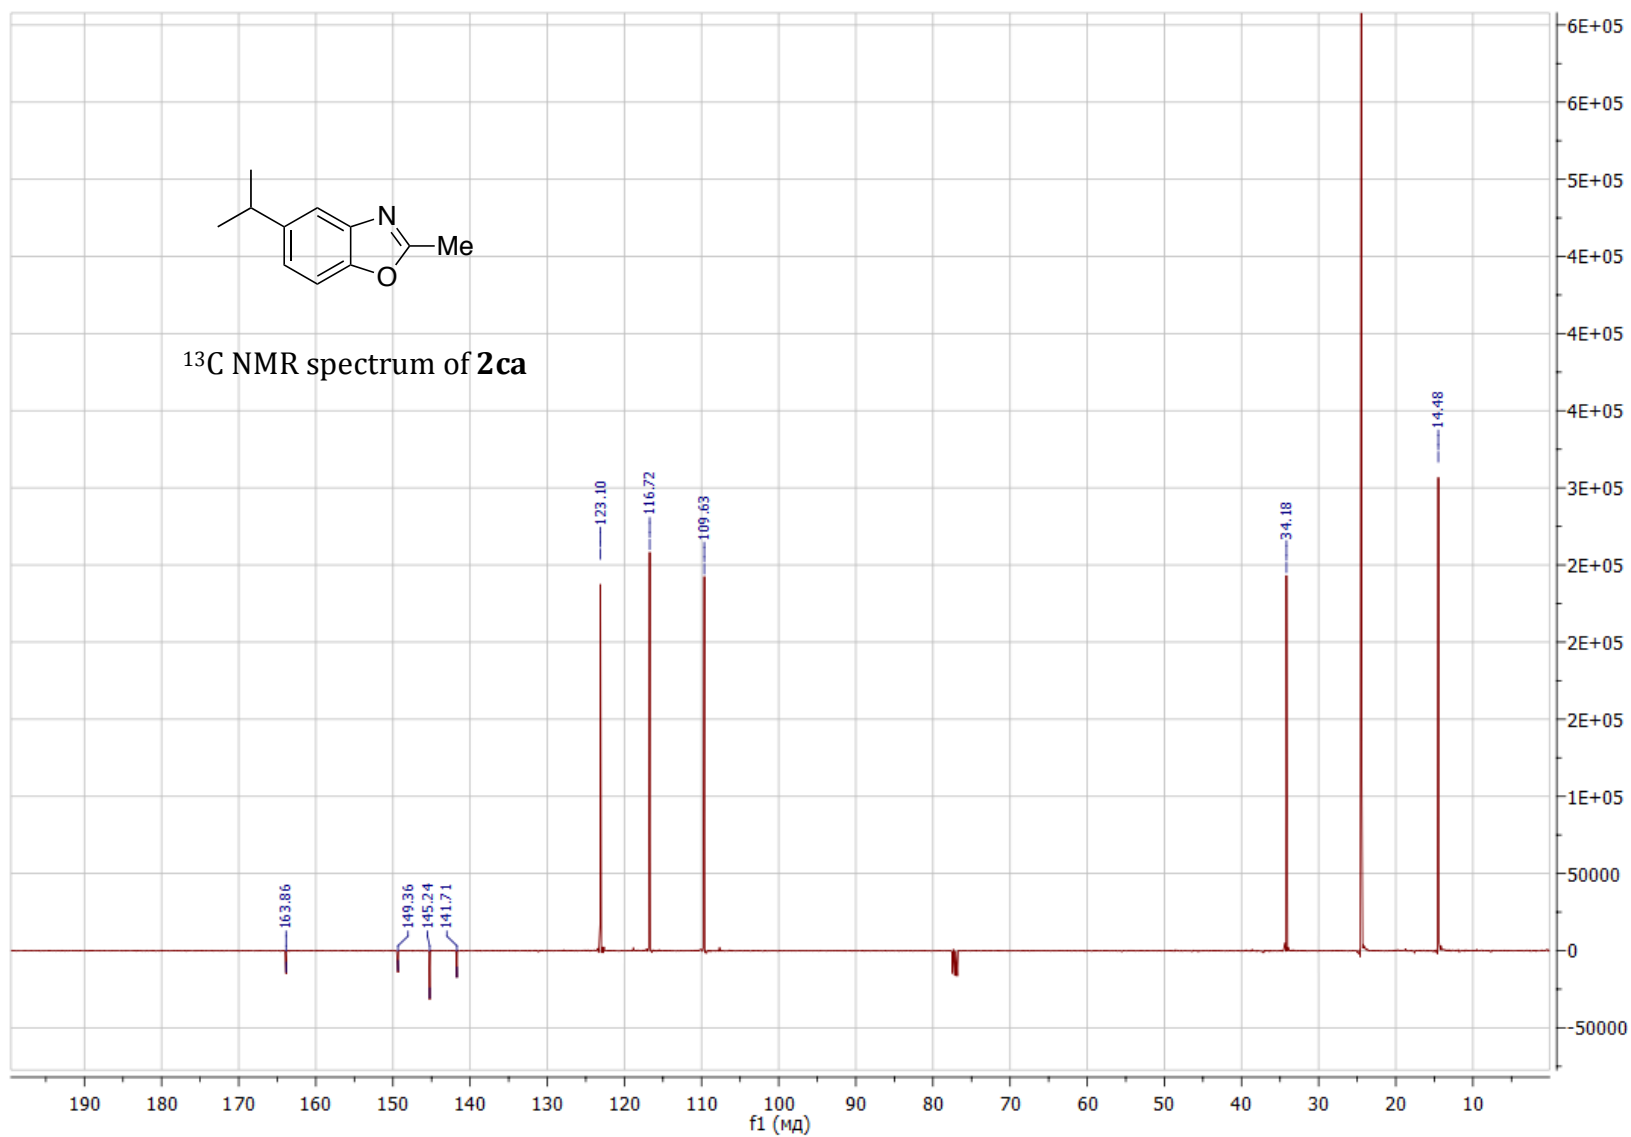

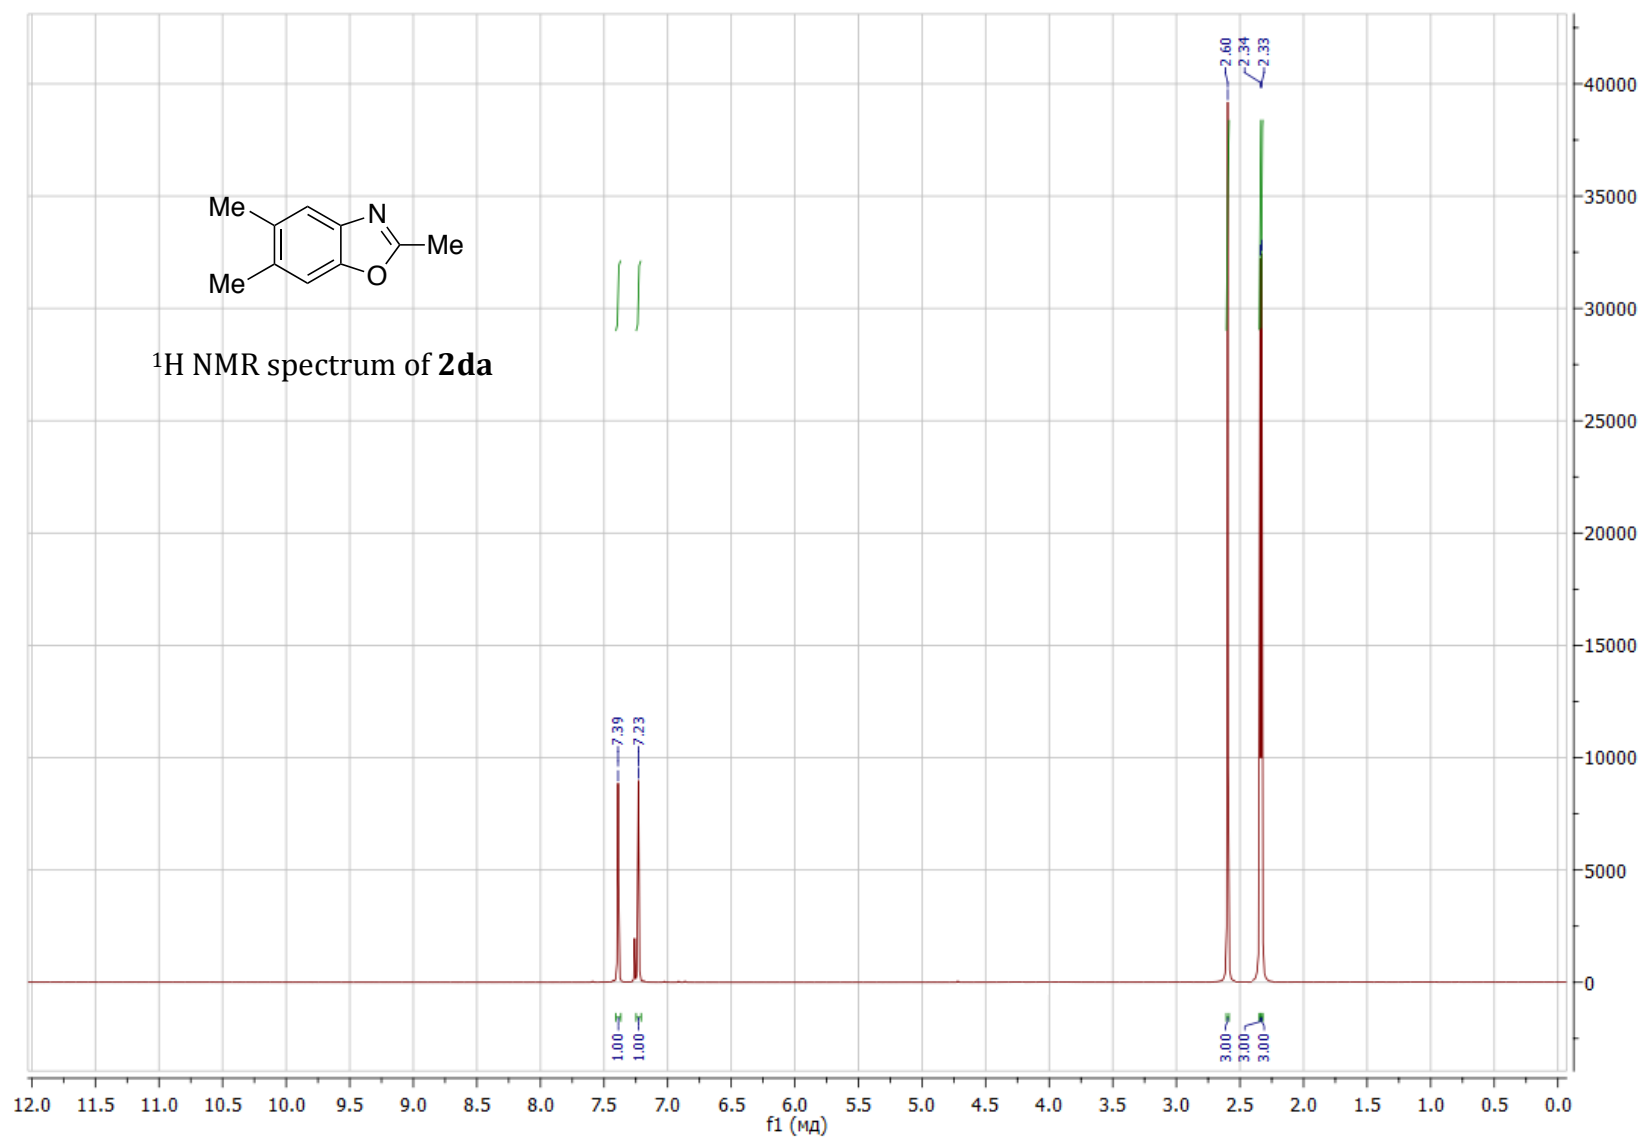



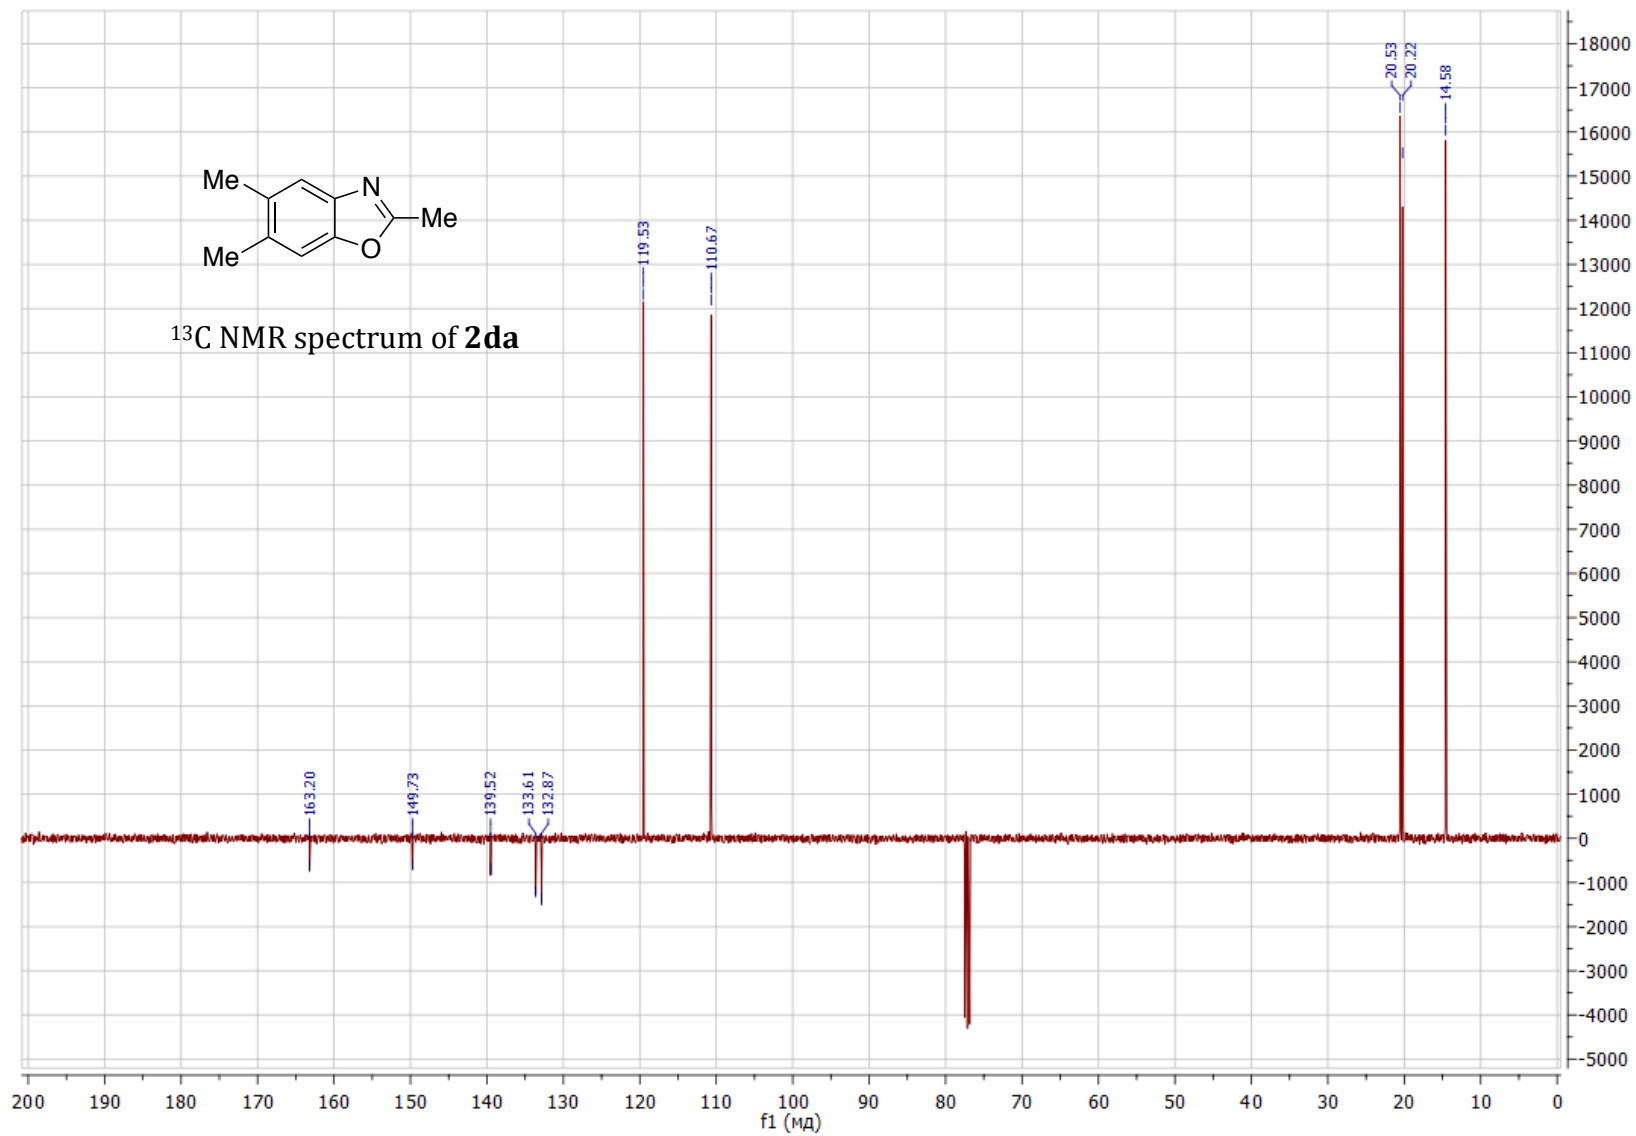

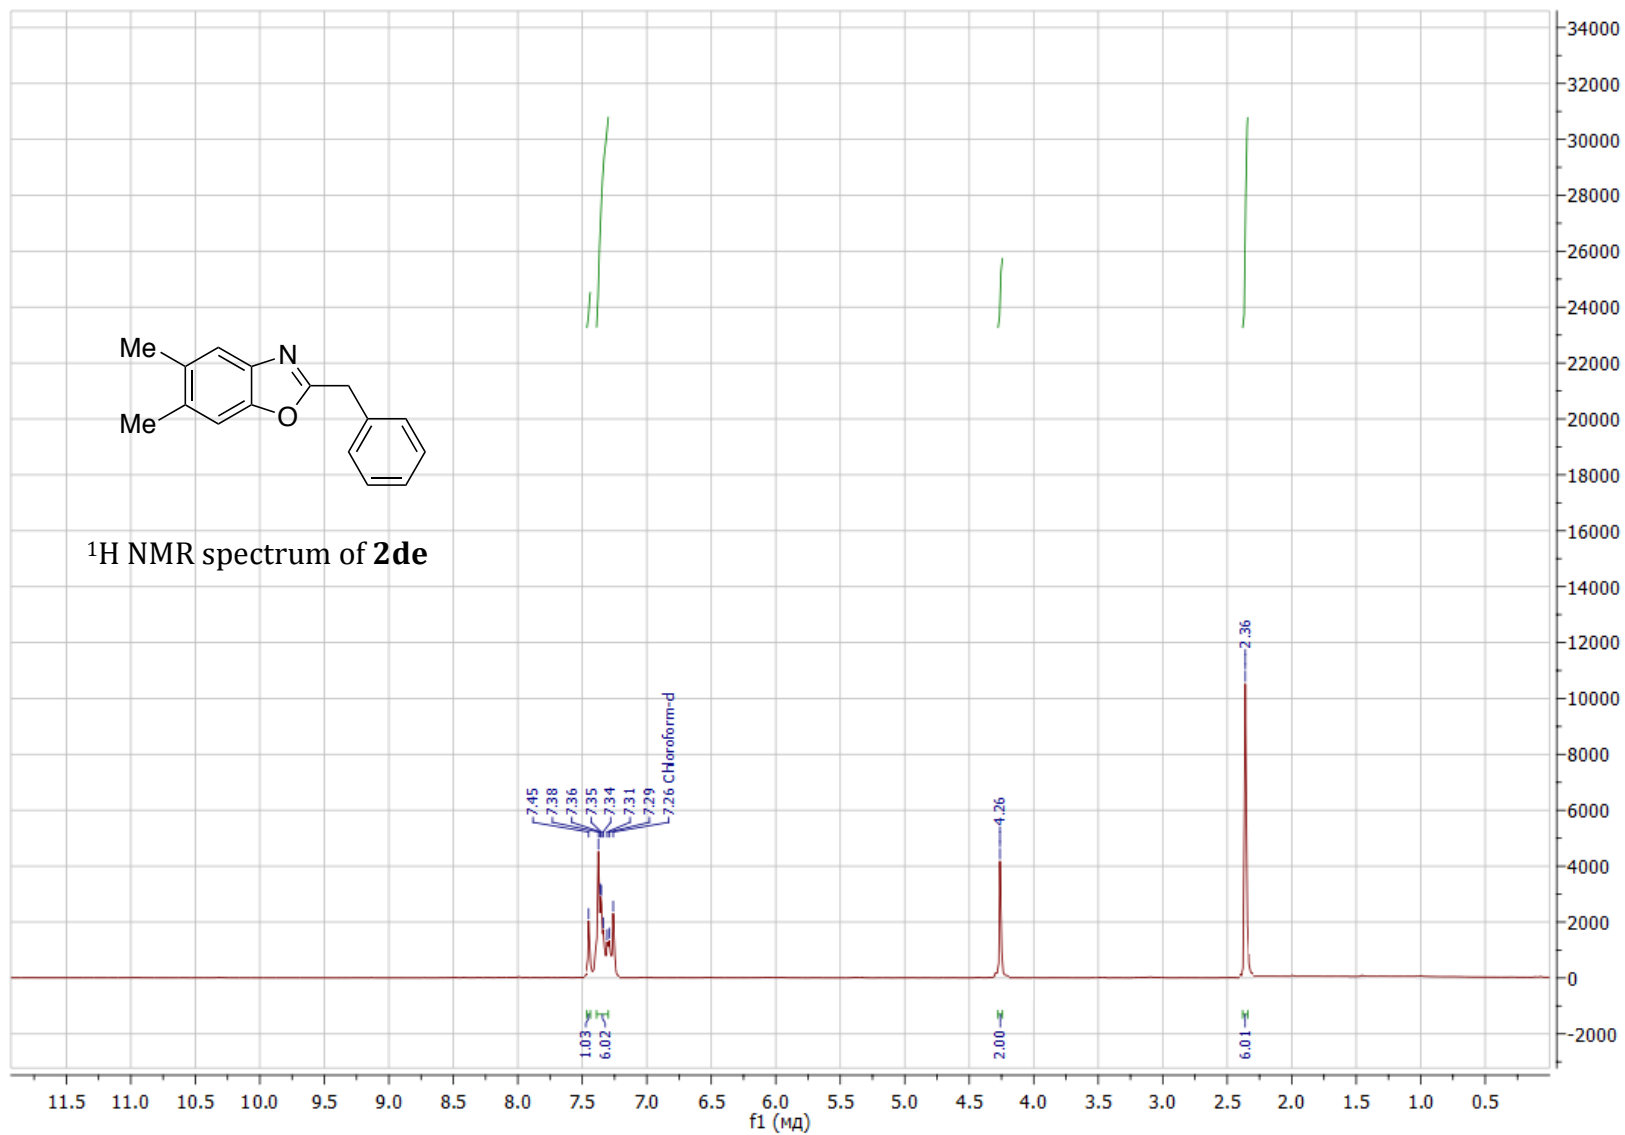

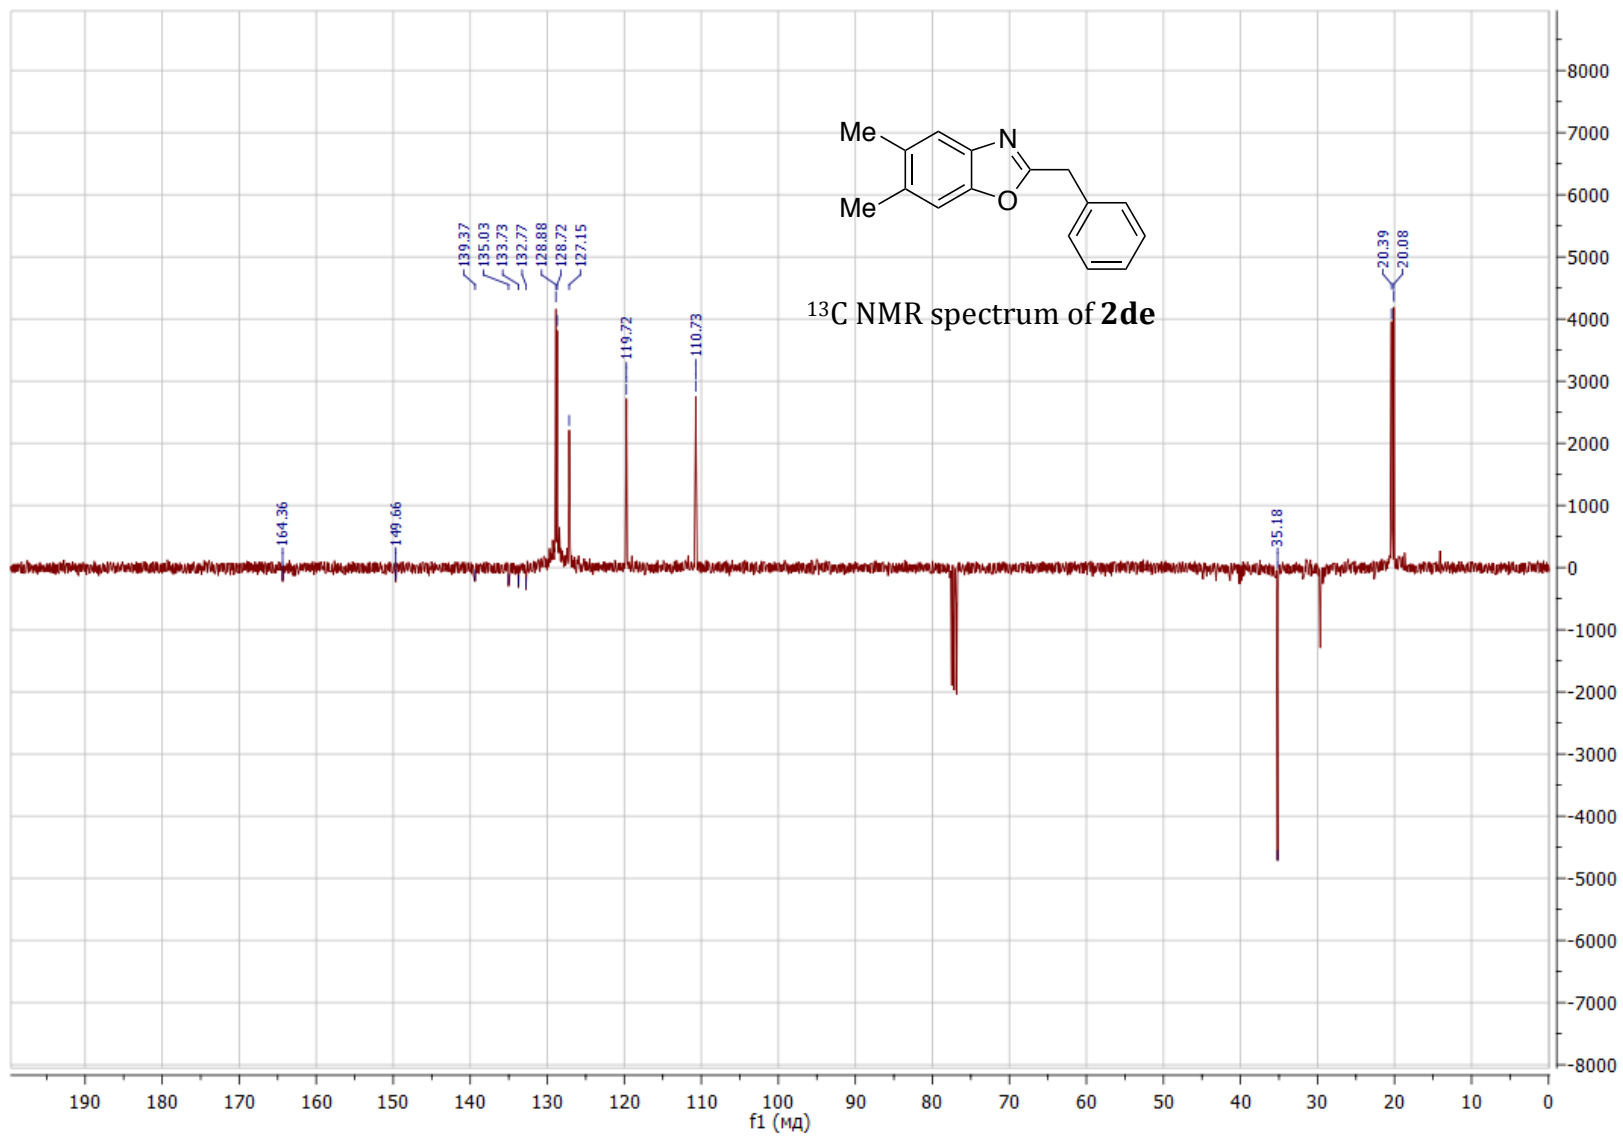

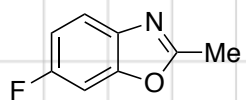

$^1\text{H}$  NMR spectrum of **2ea**

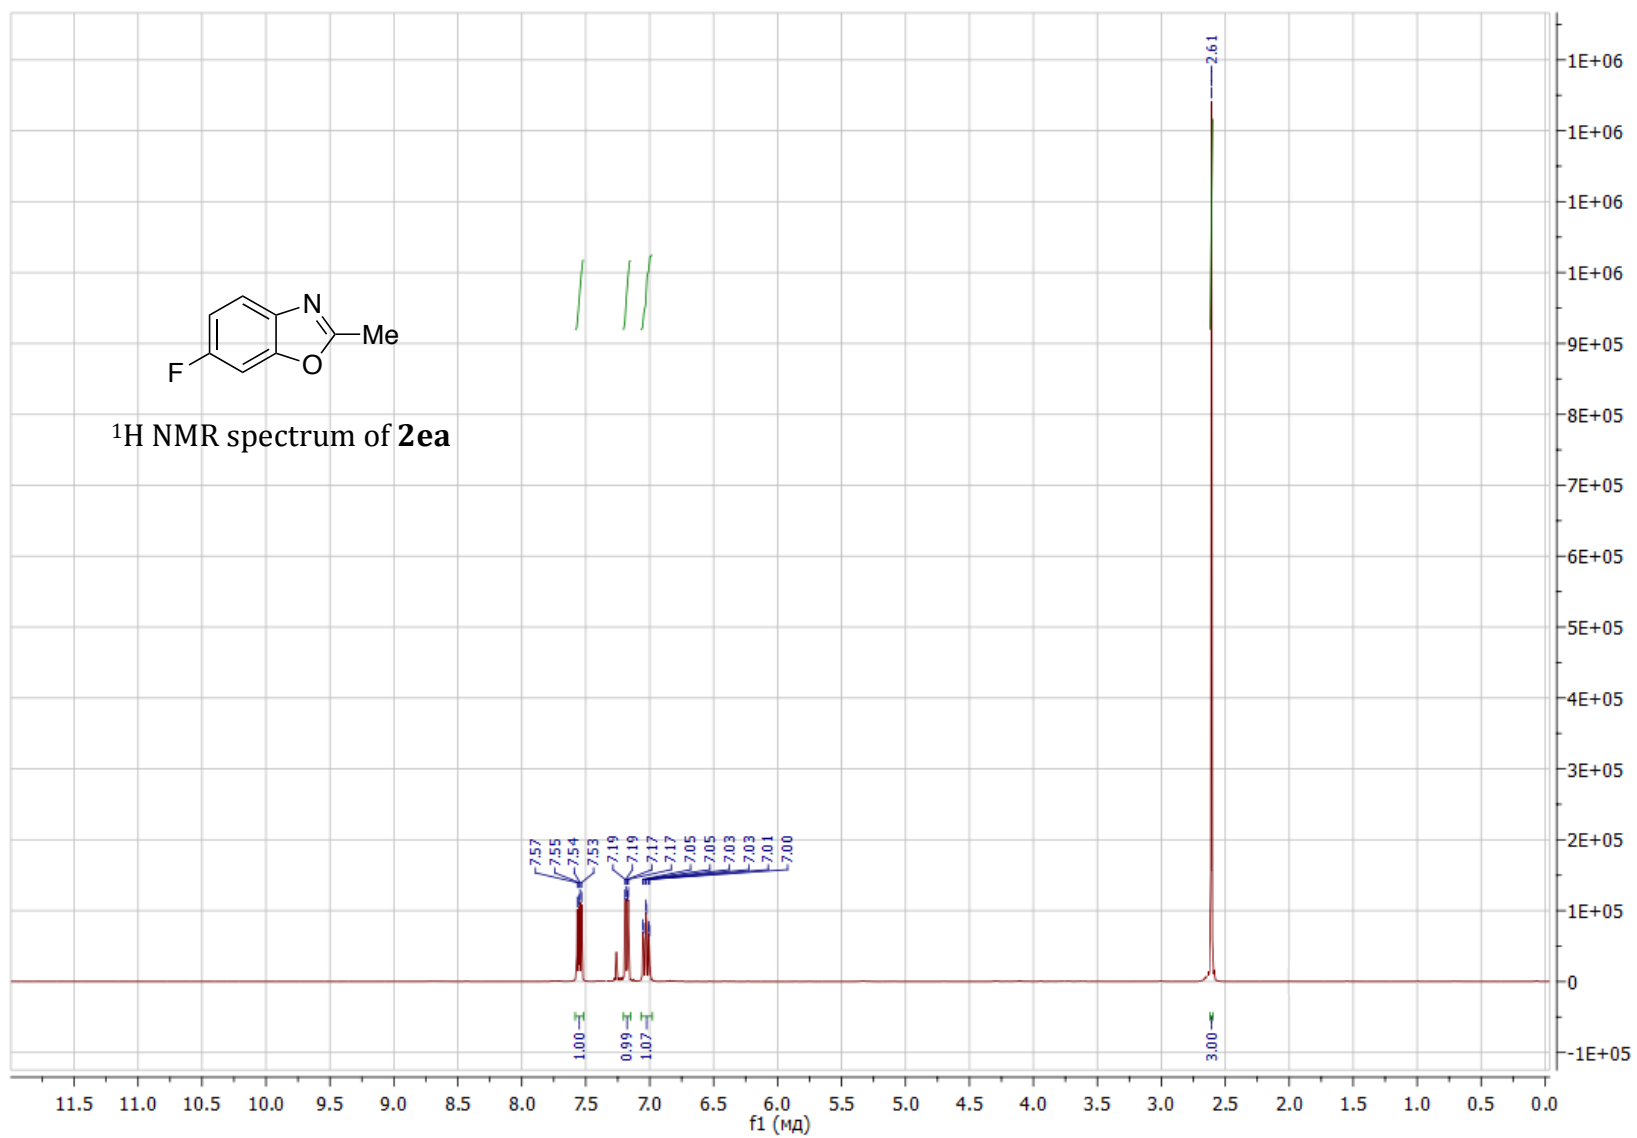

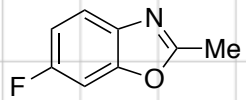

<sup>13</sup>C NMR spectrum of **2ea**

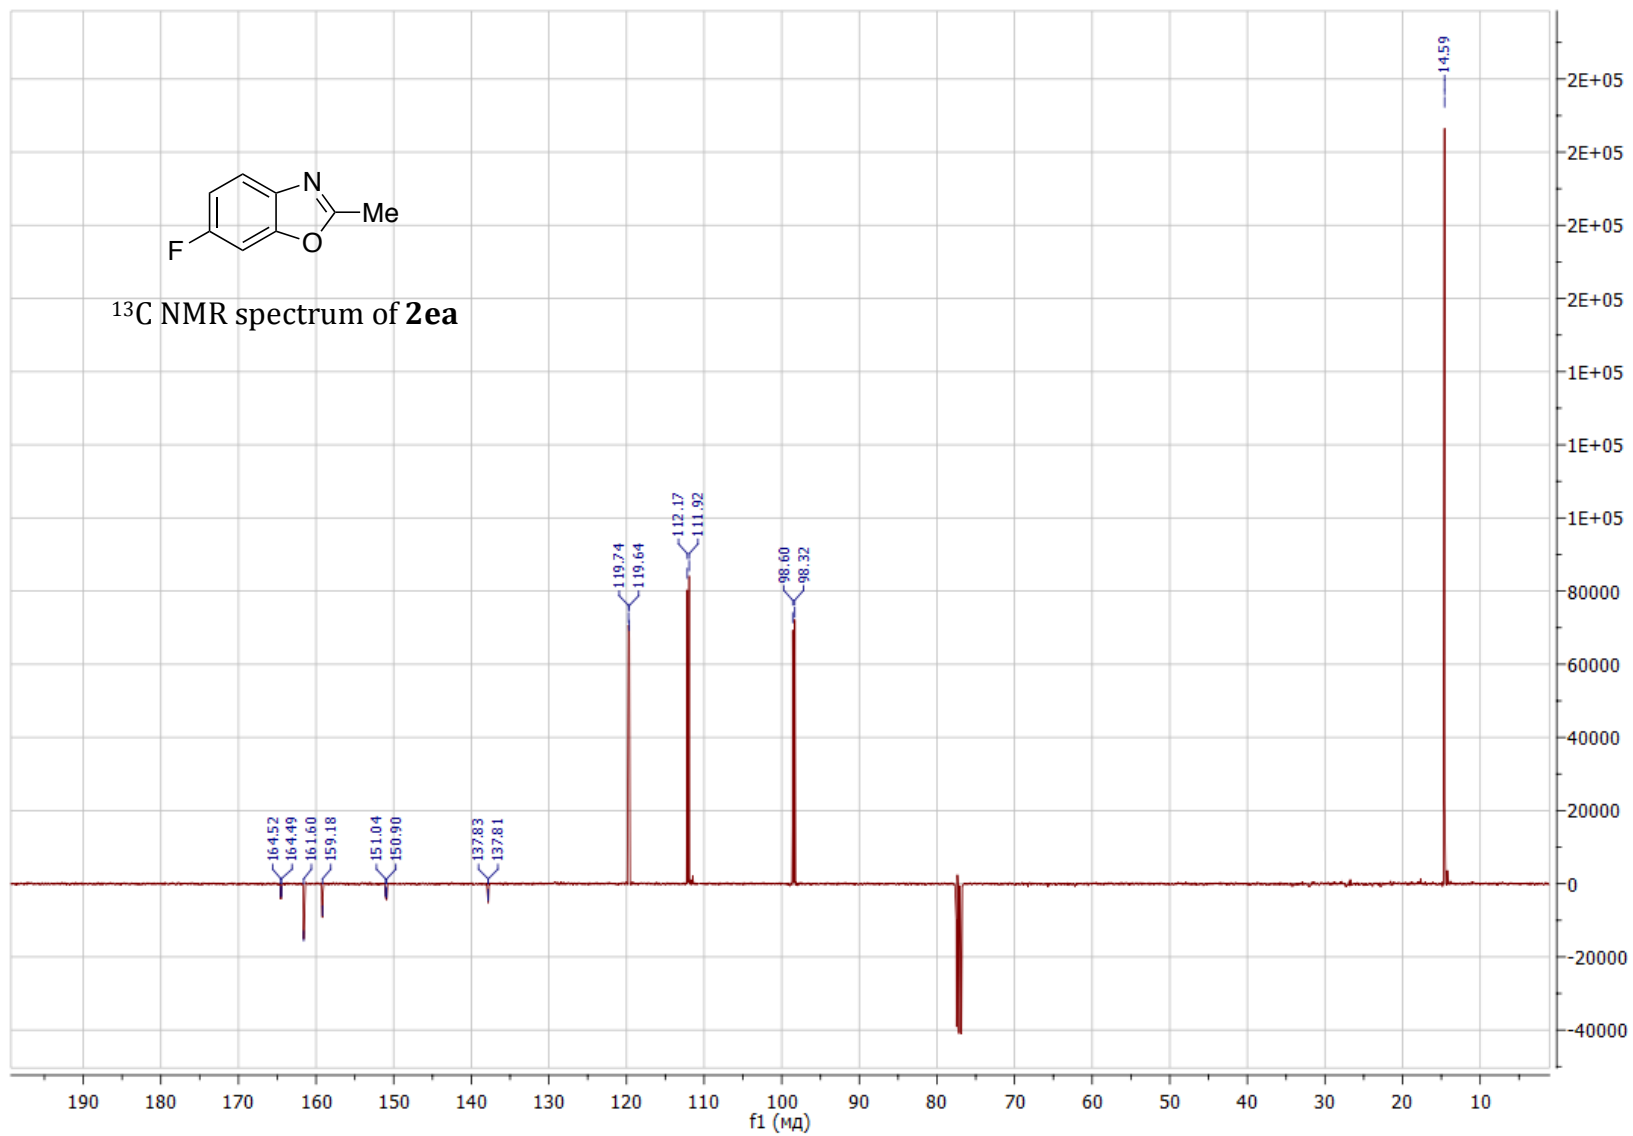

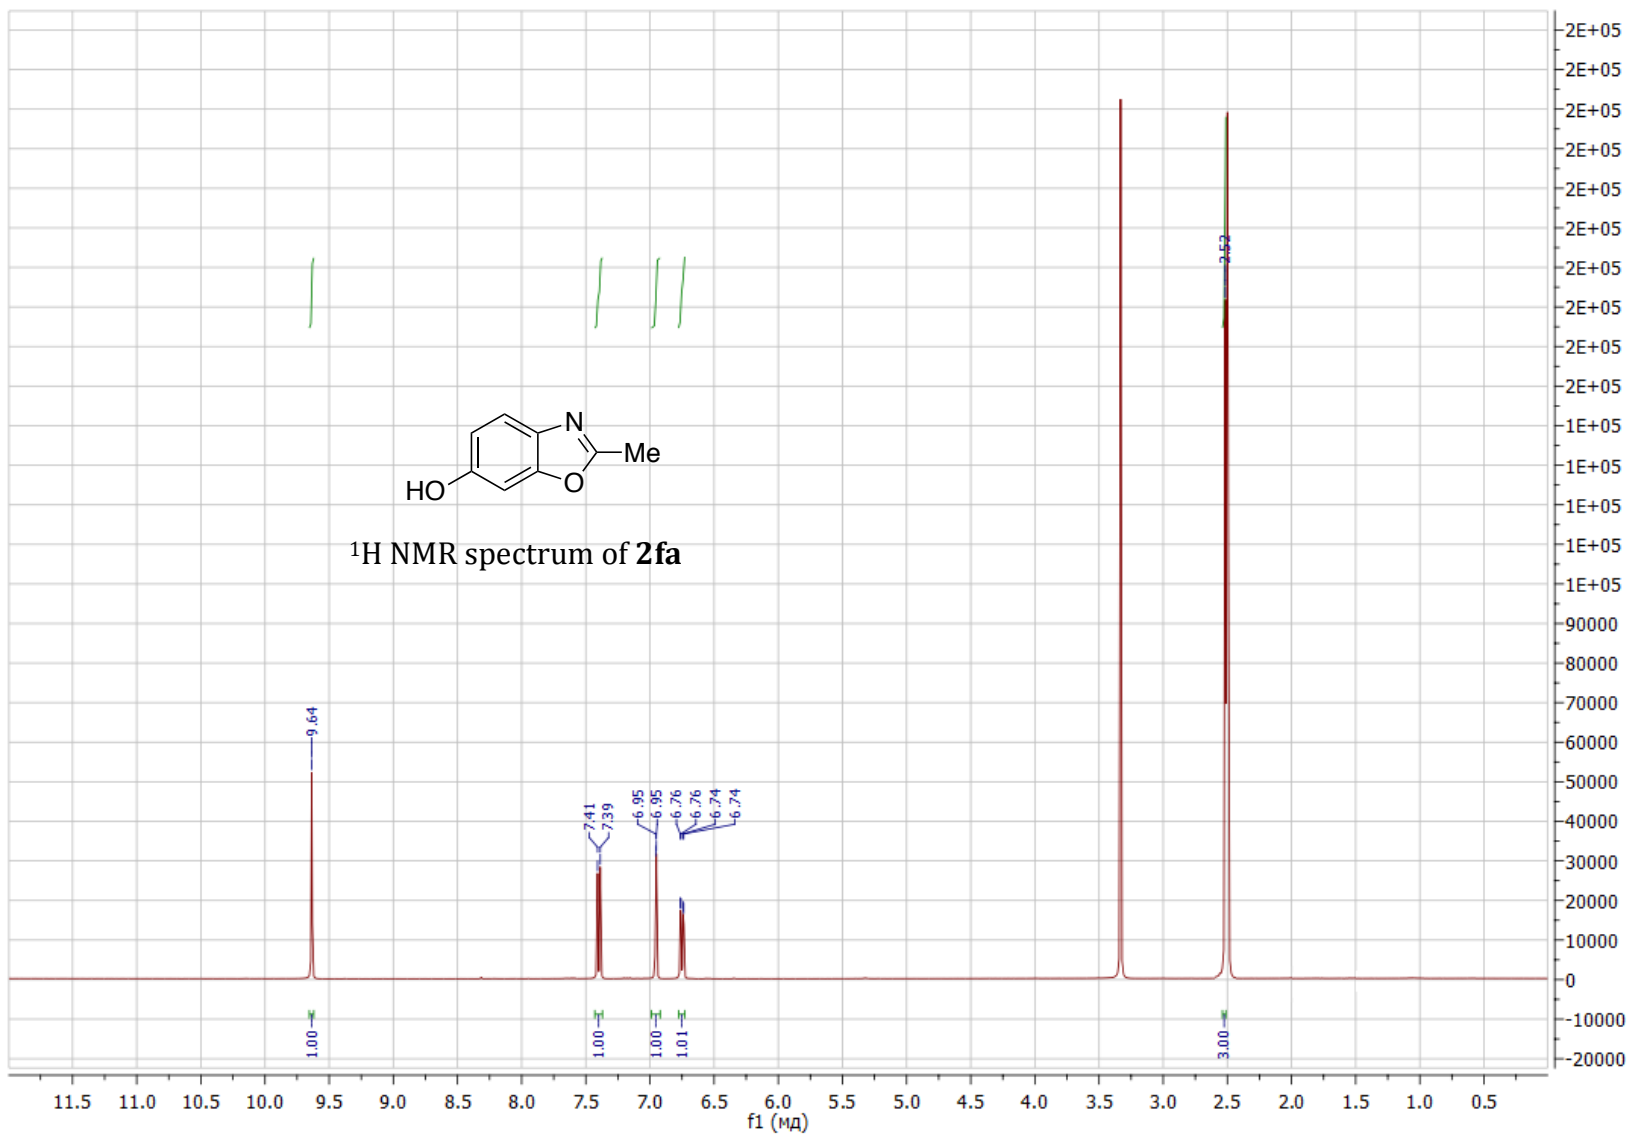

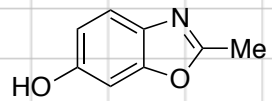

$^{13}\text{C}$  NMR spectrum of **2fa**

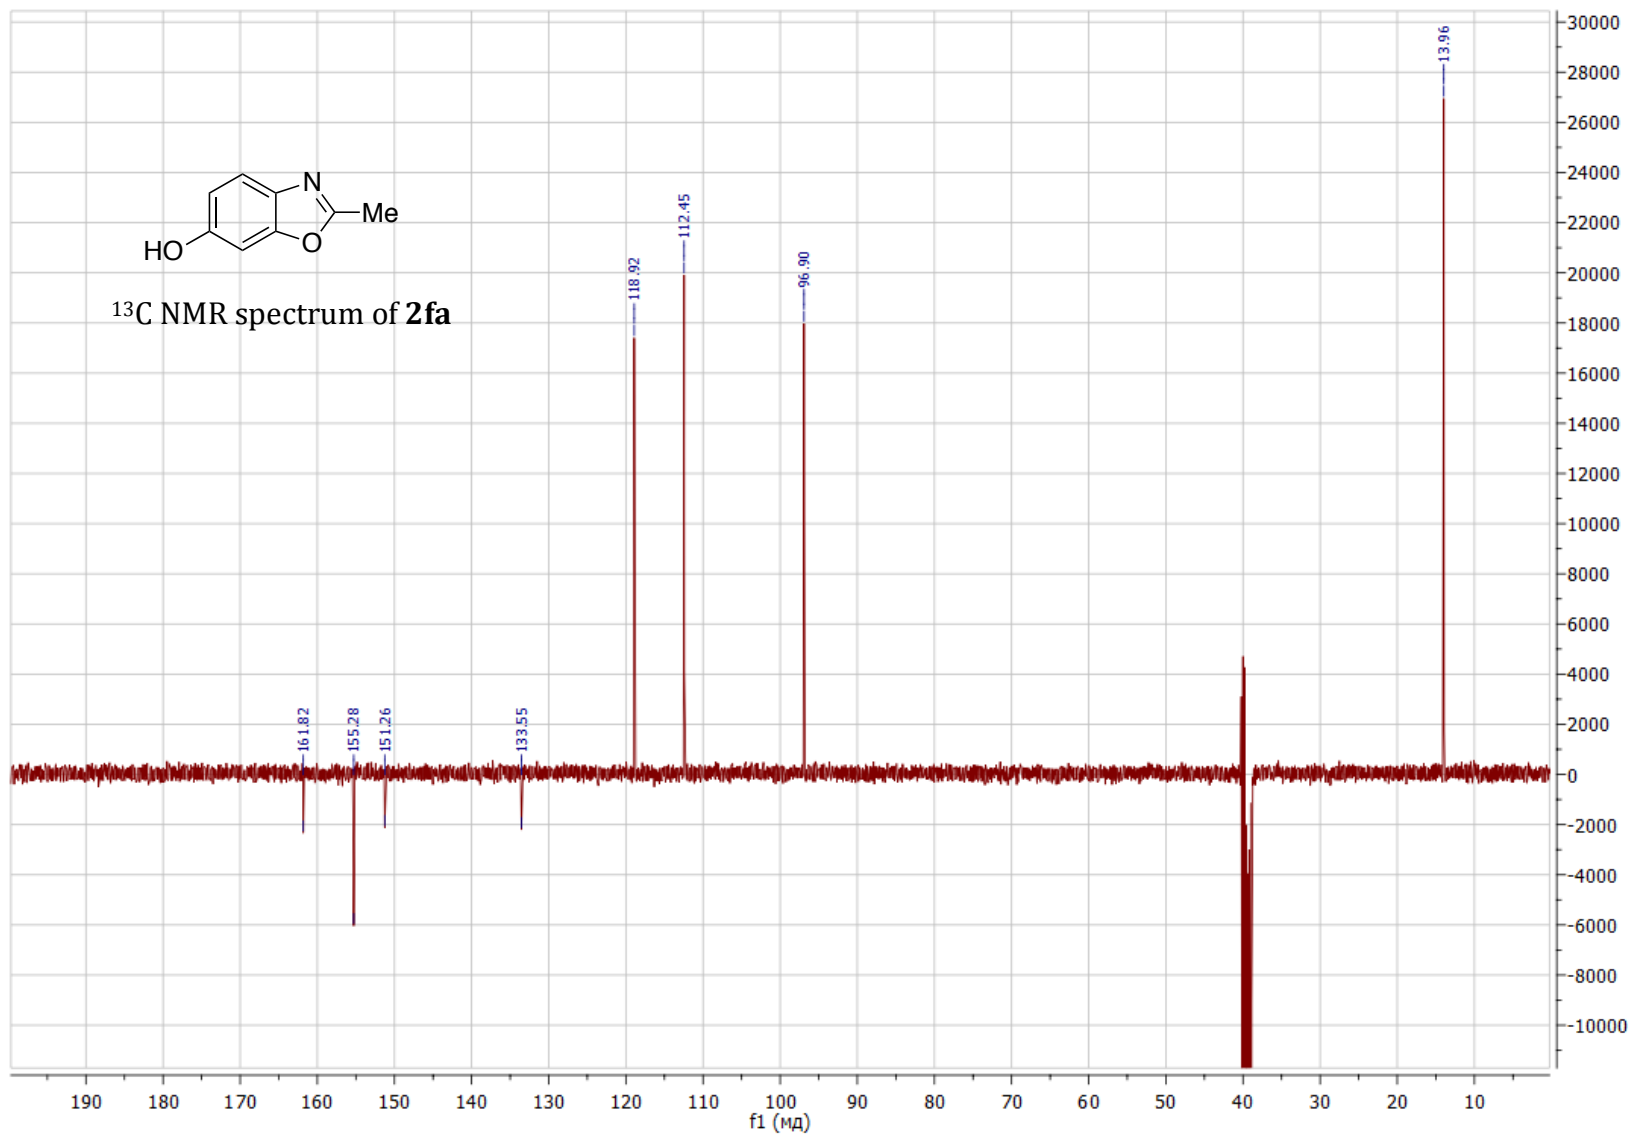

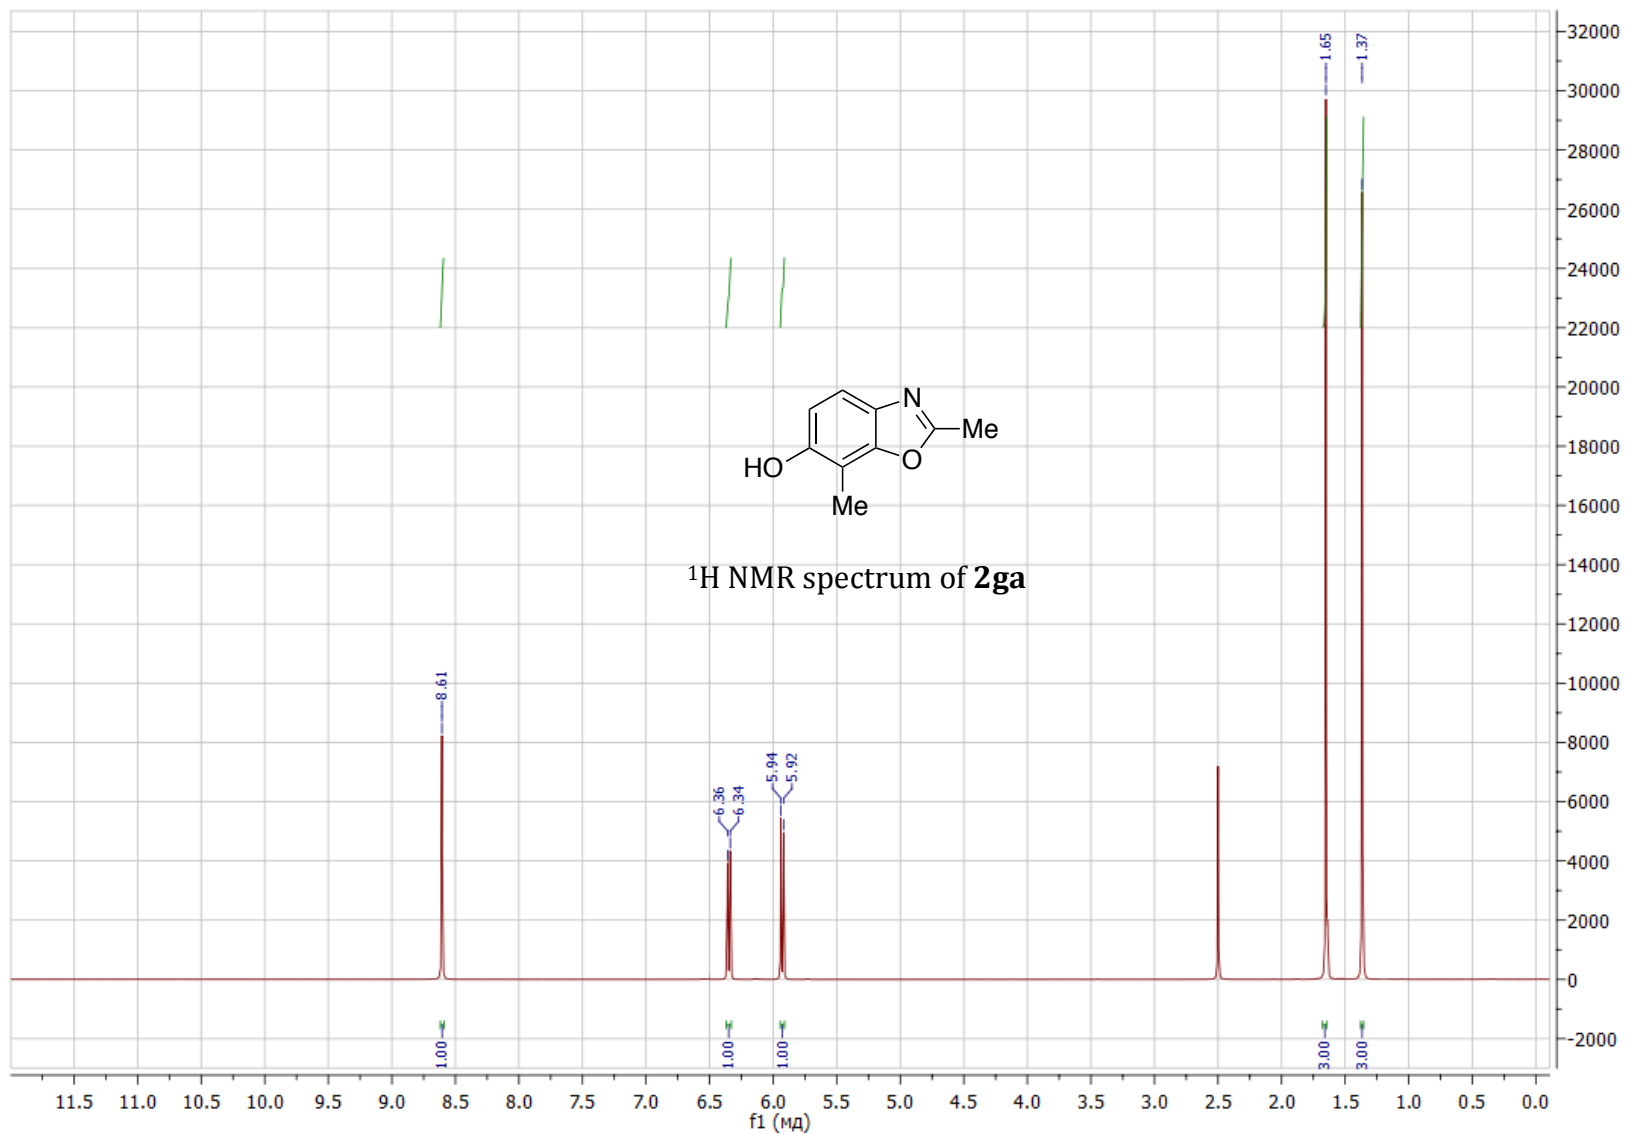



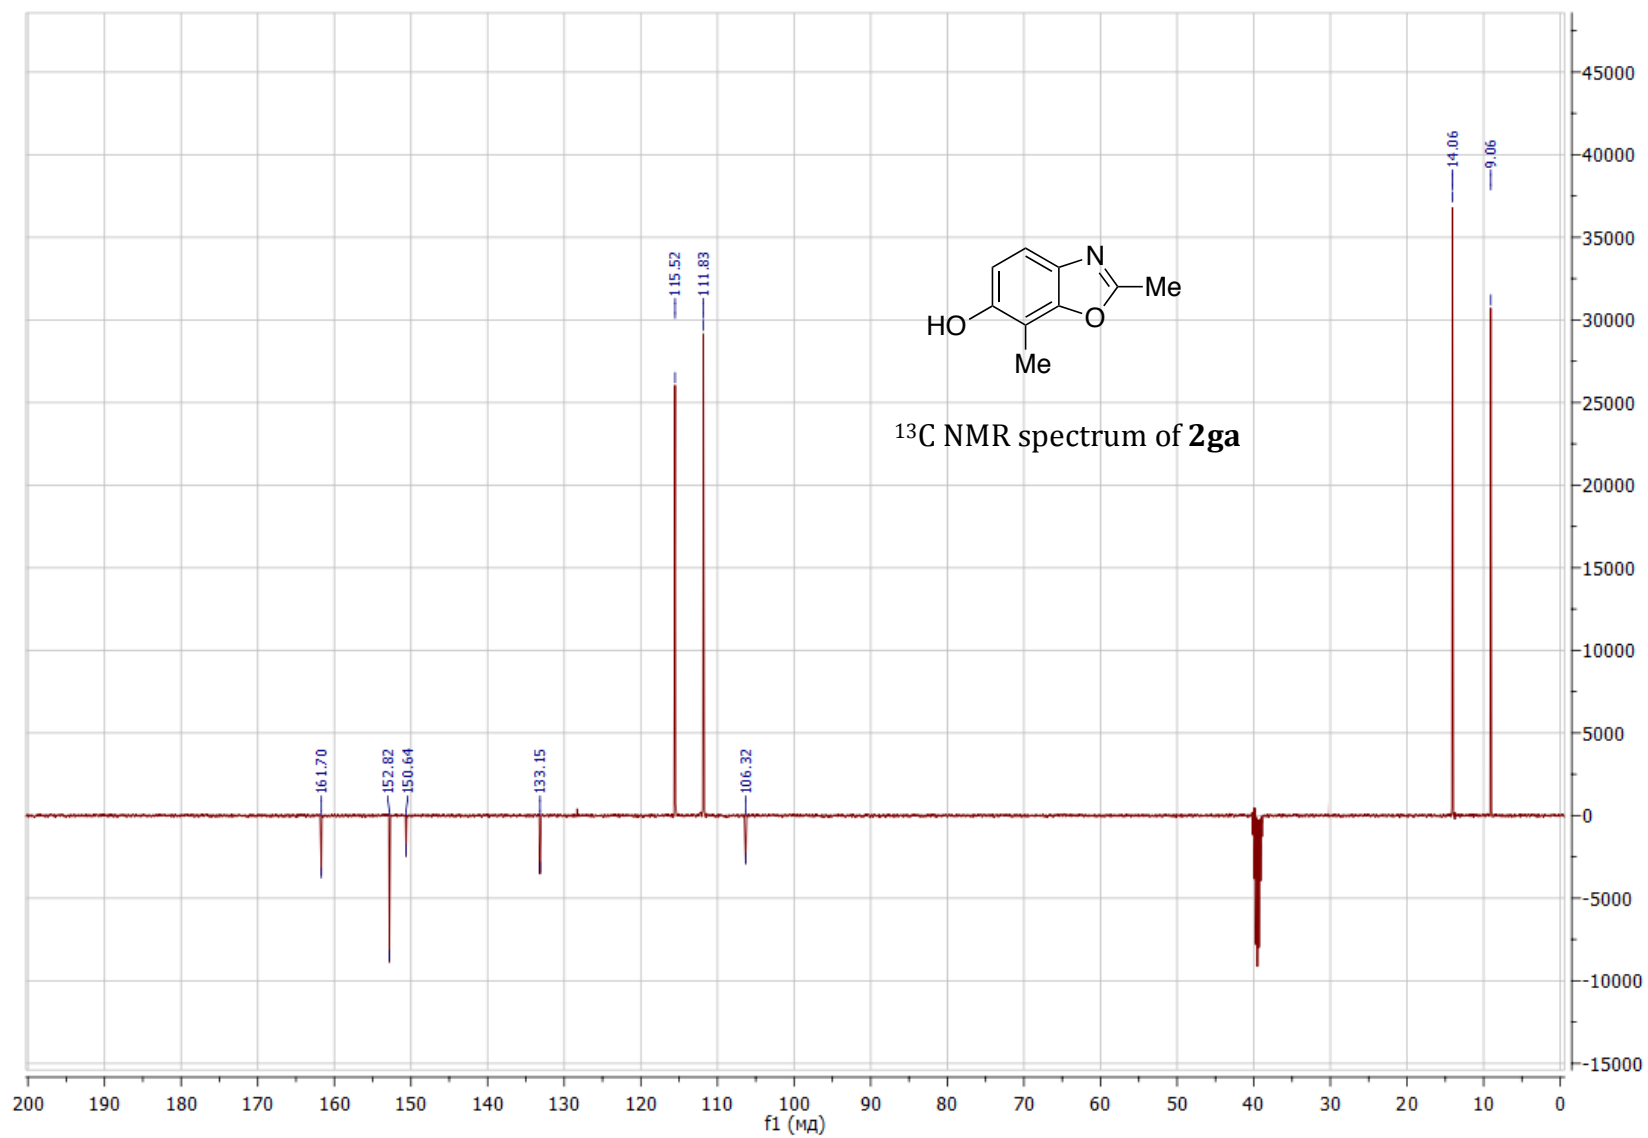

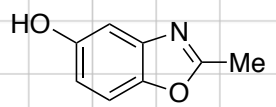

<sup>1</sup>H NMR spectrum of **2ha**

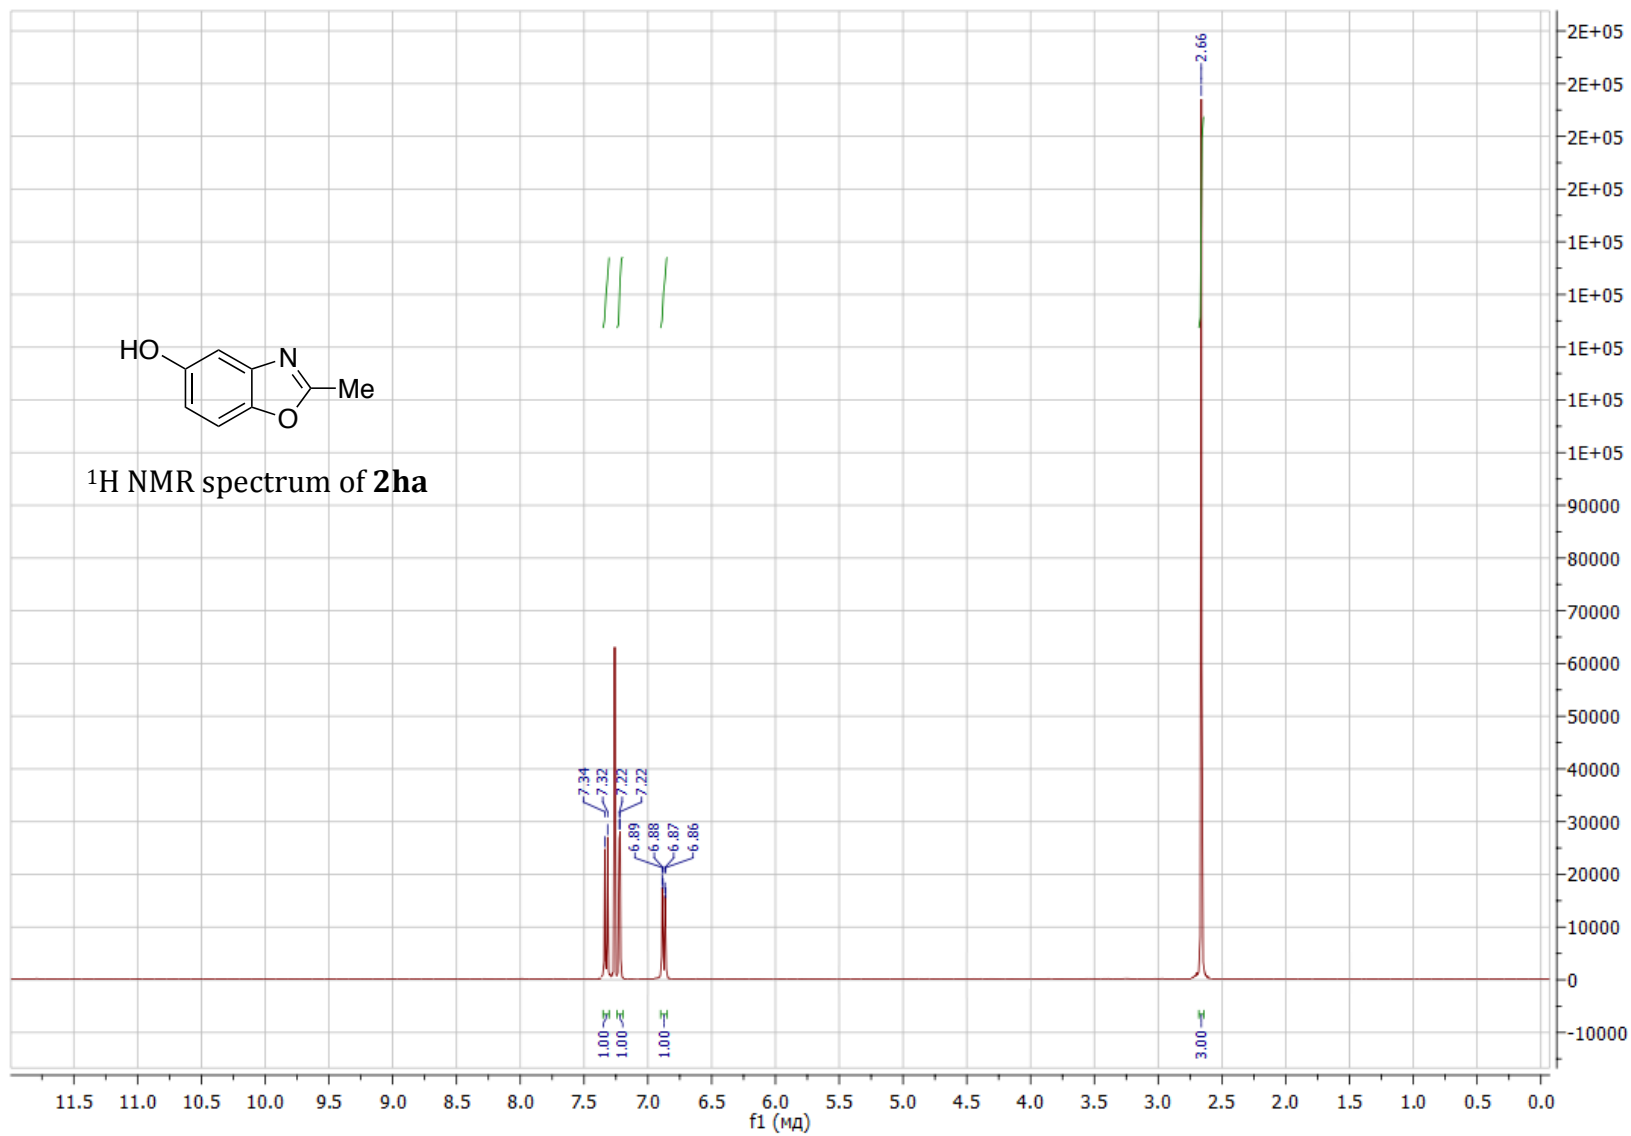

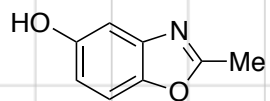

<sup>13</sup>C NMR spectrum of **2ha**

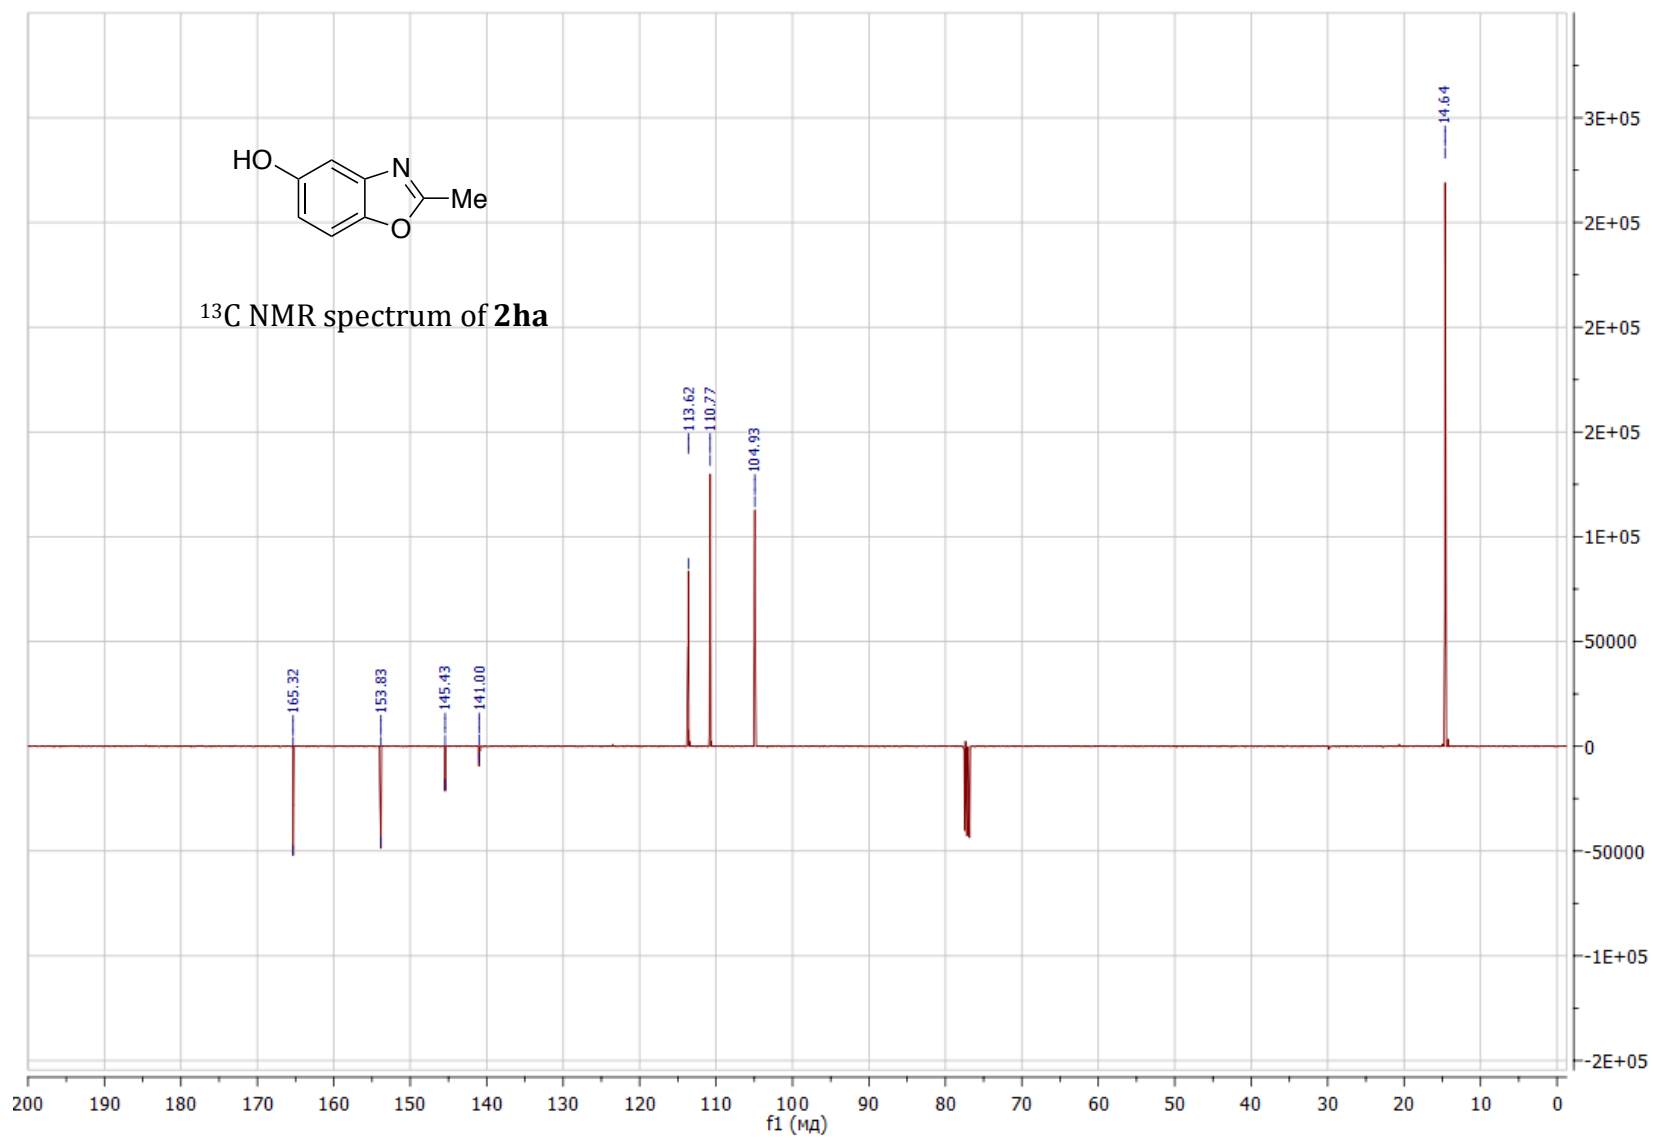

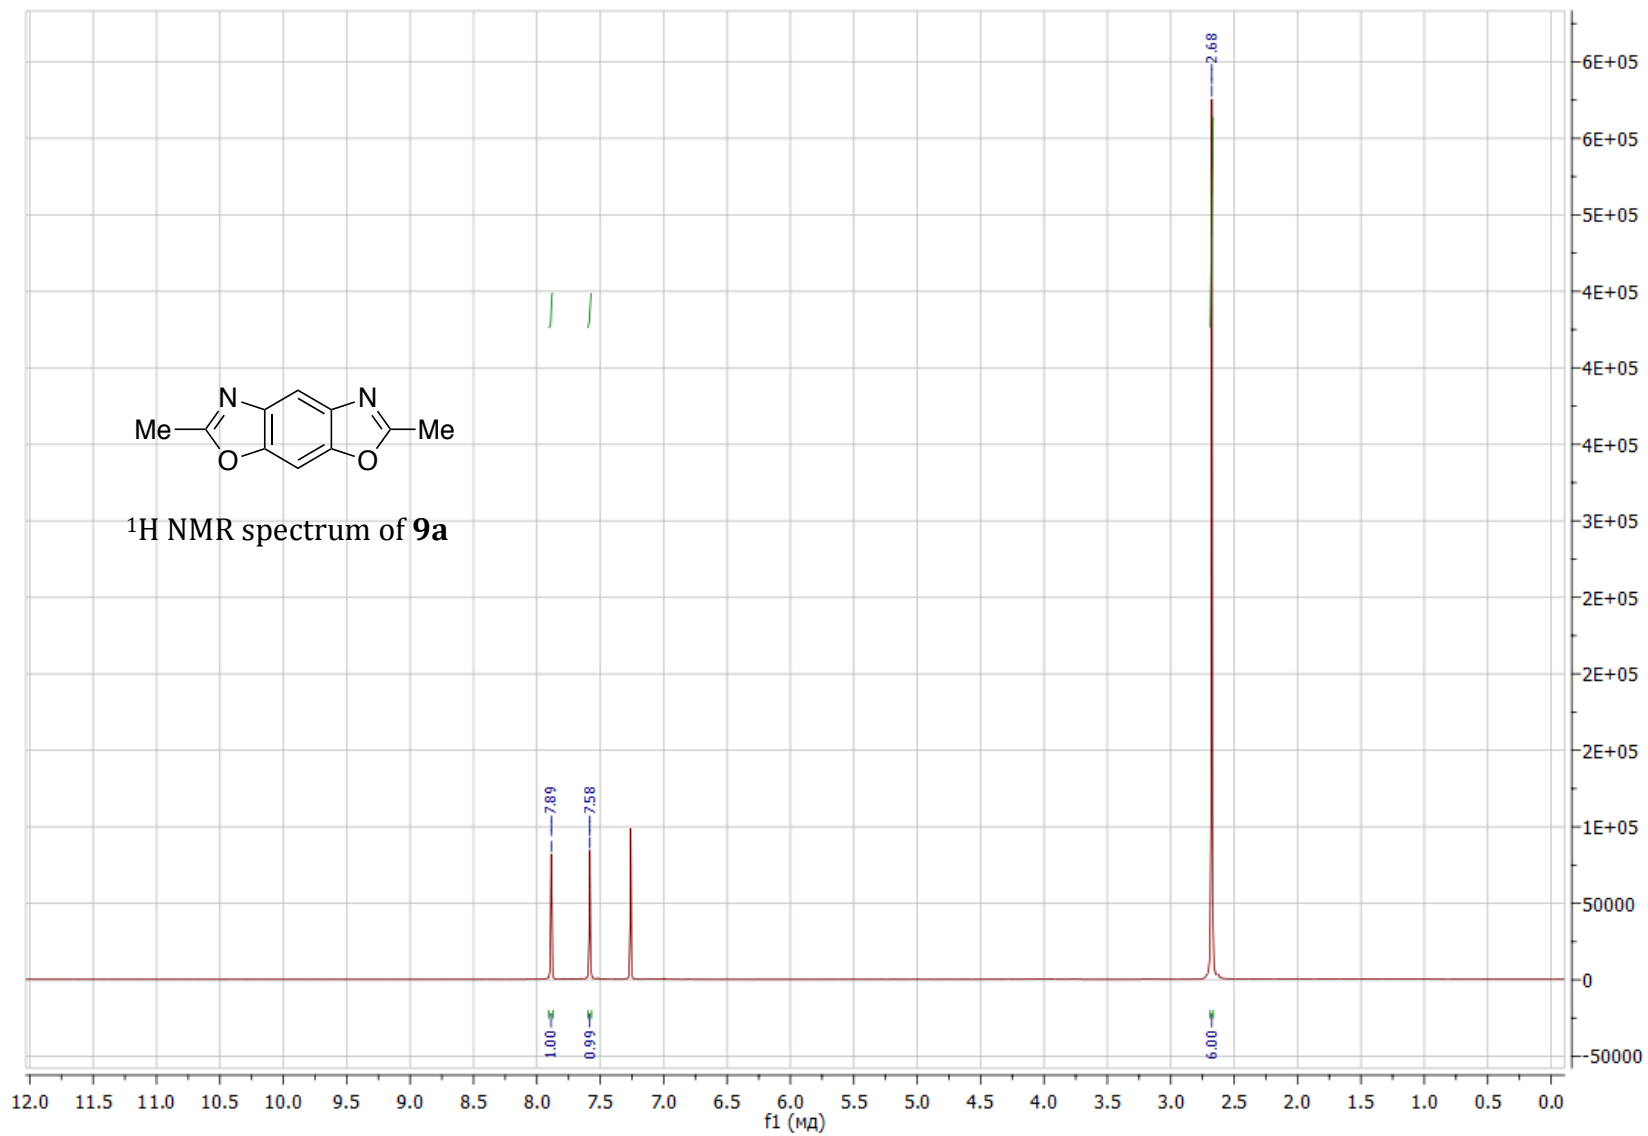

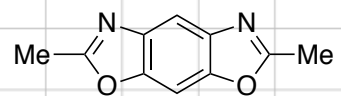

$^{13}\text{C}$  NMR spectrum of **9a**

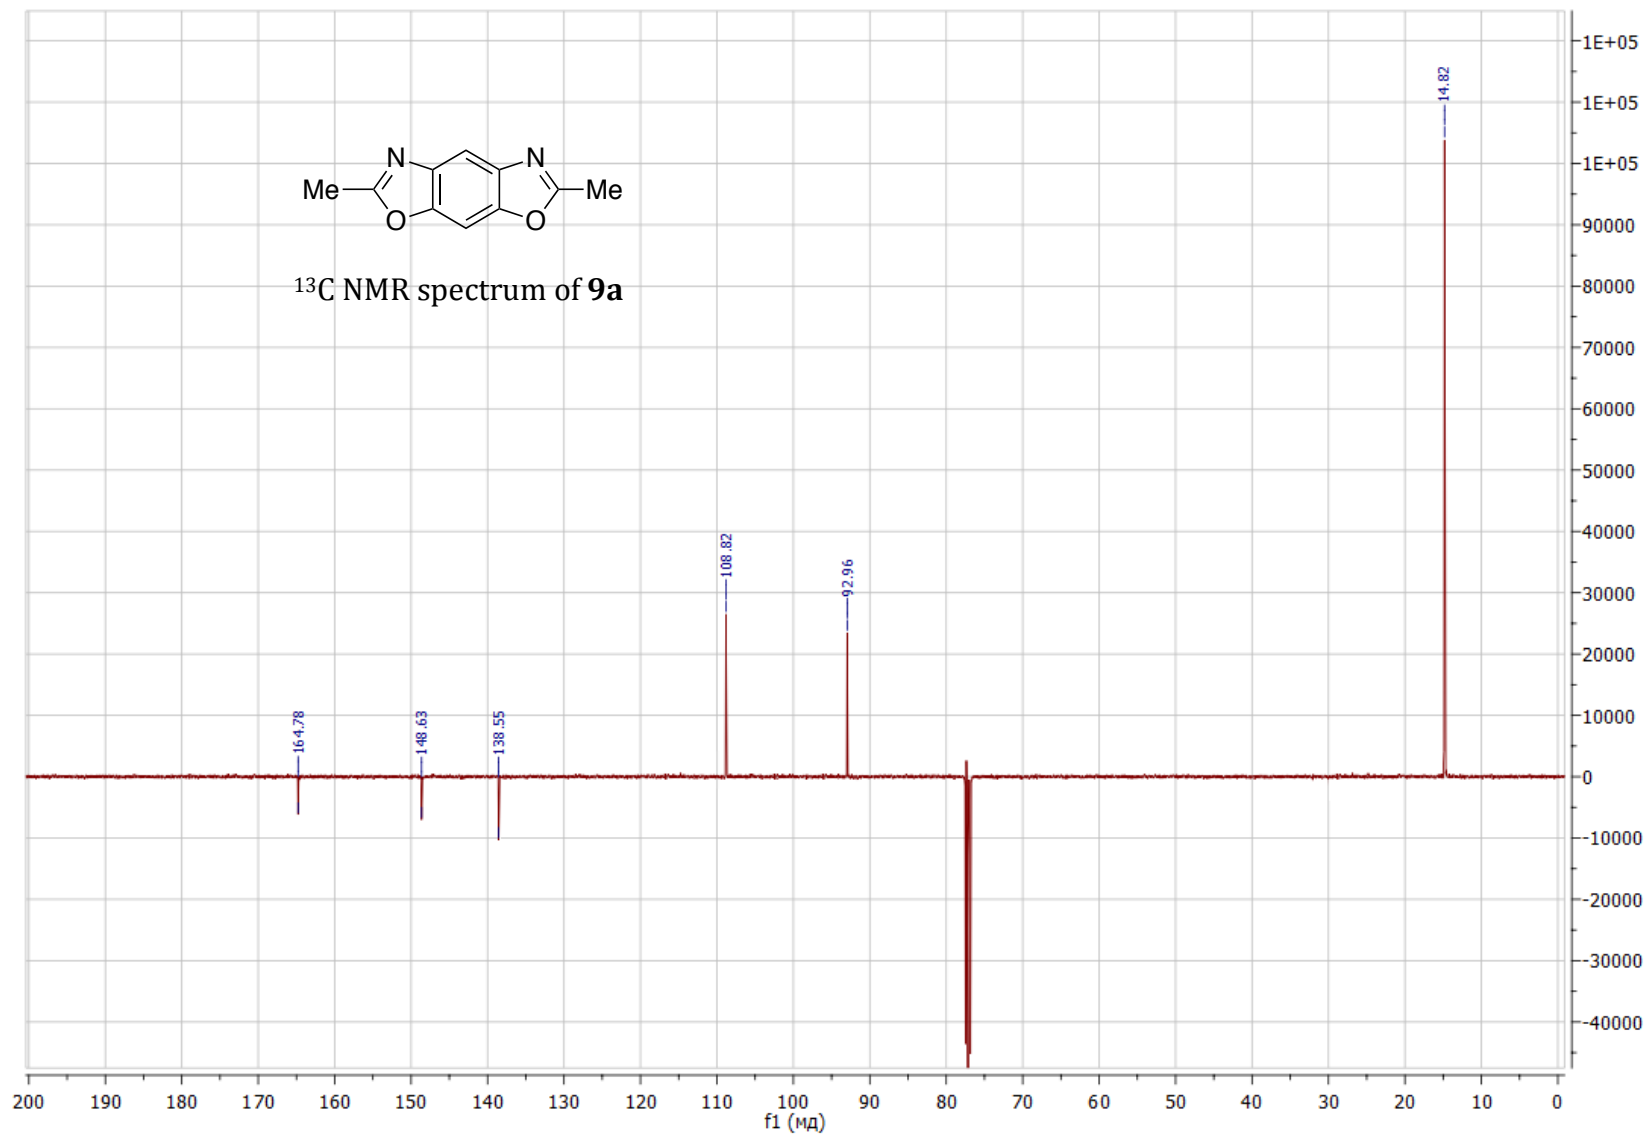

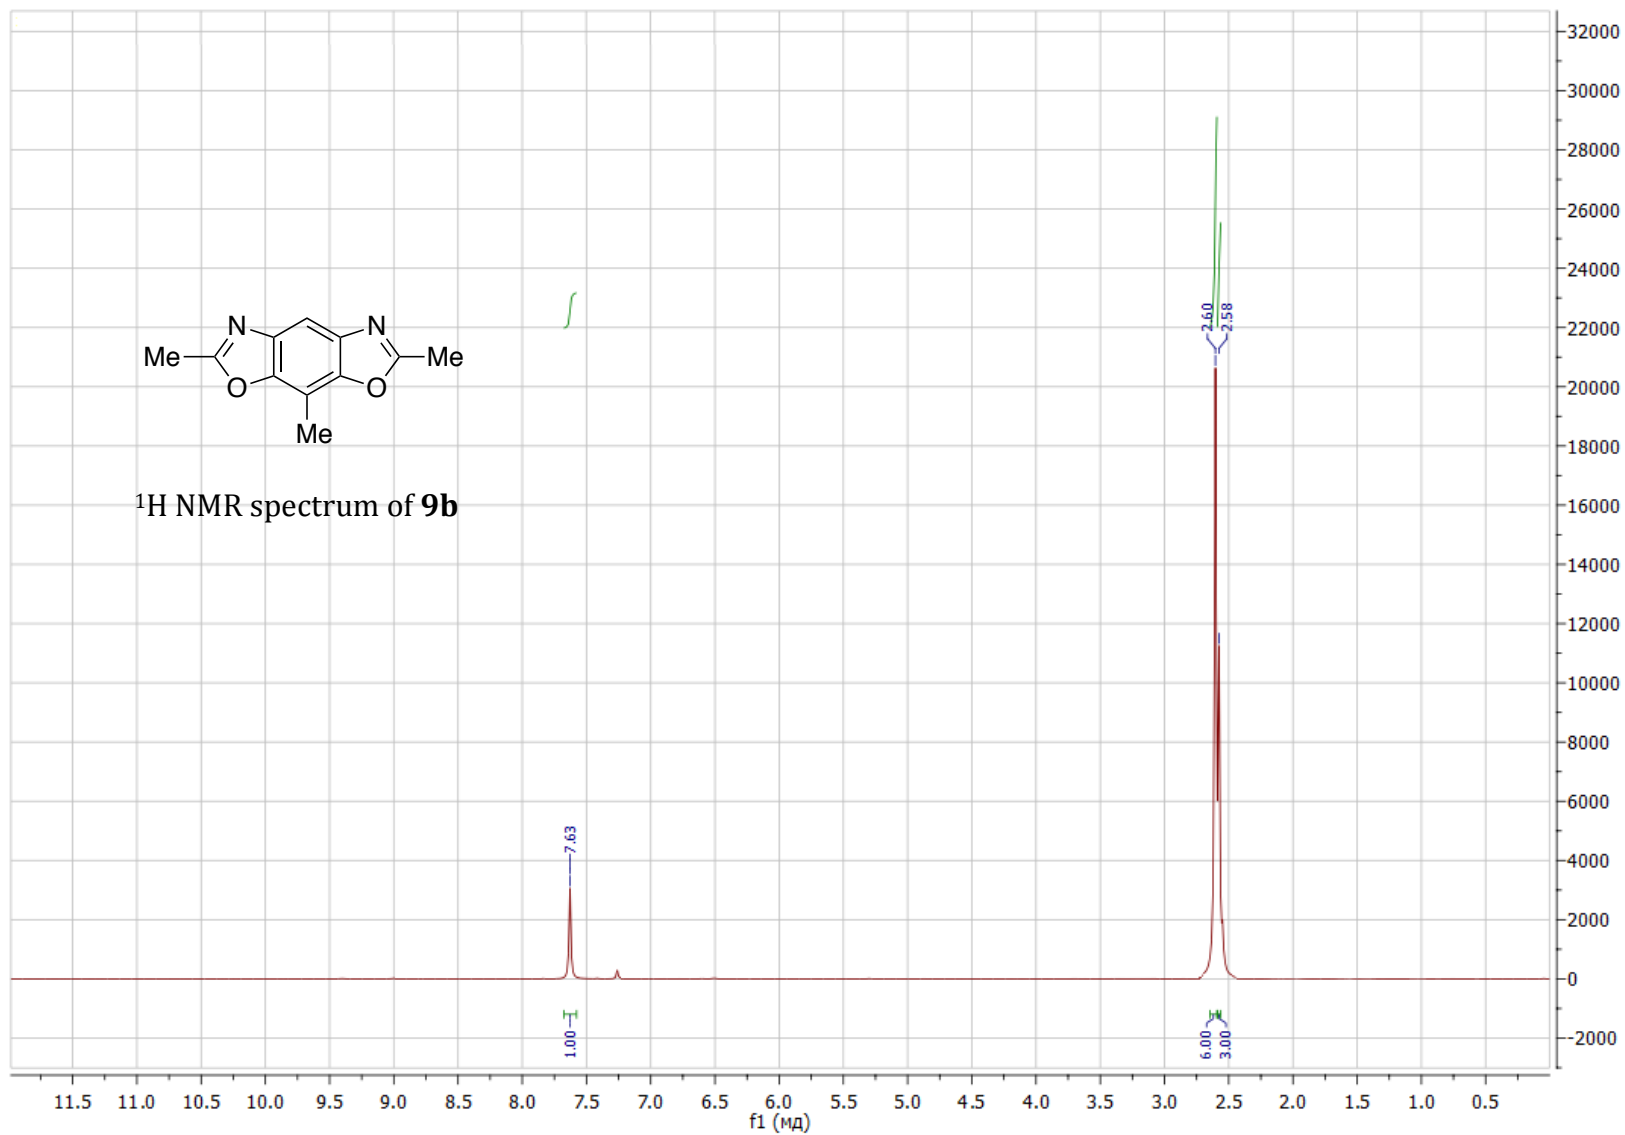

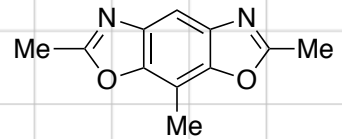

$^{13}\text{C}$  NMR spectrum of **9b**

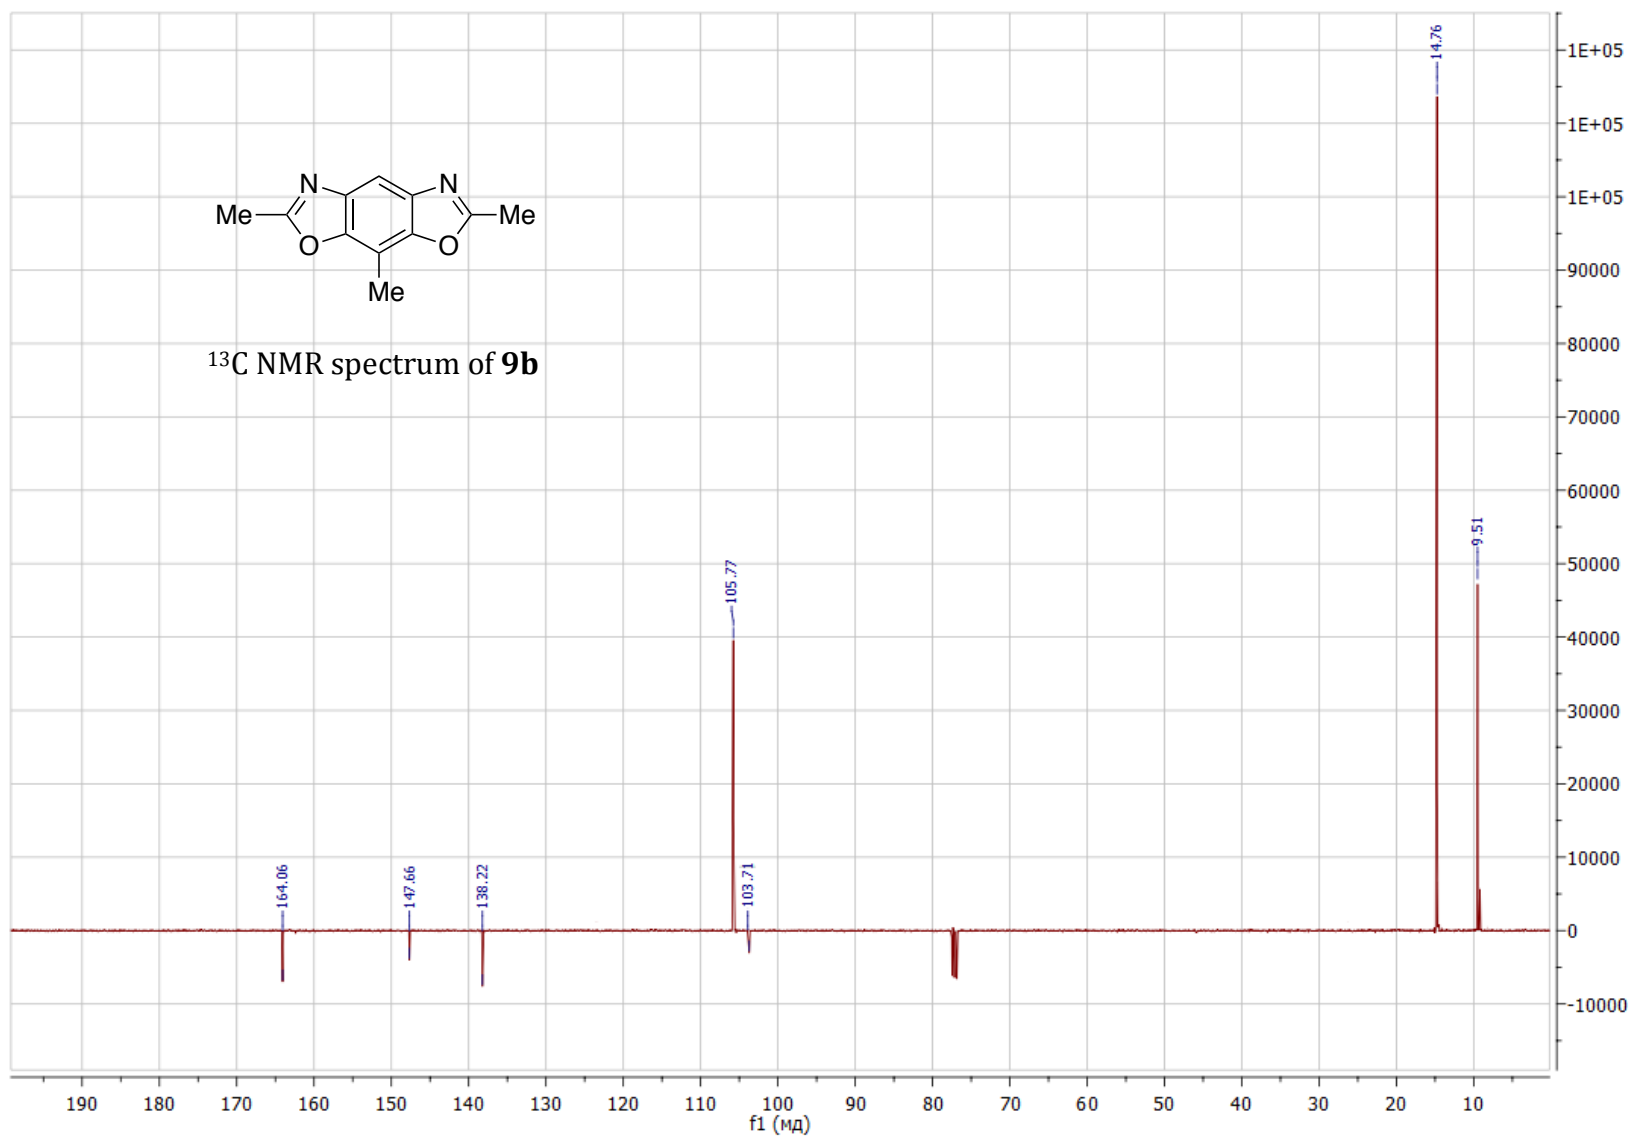

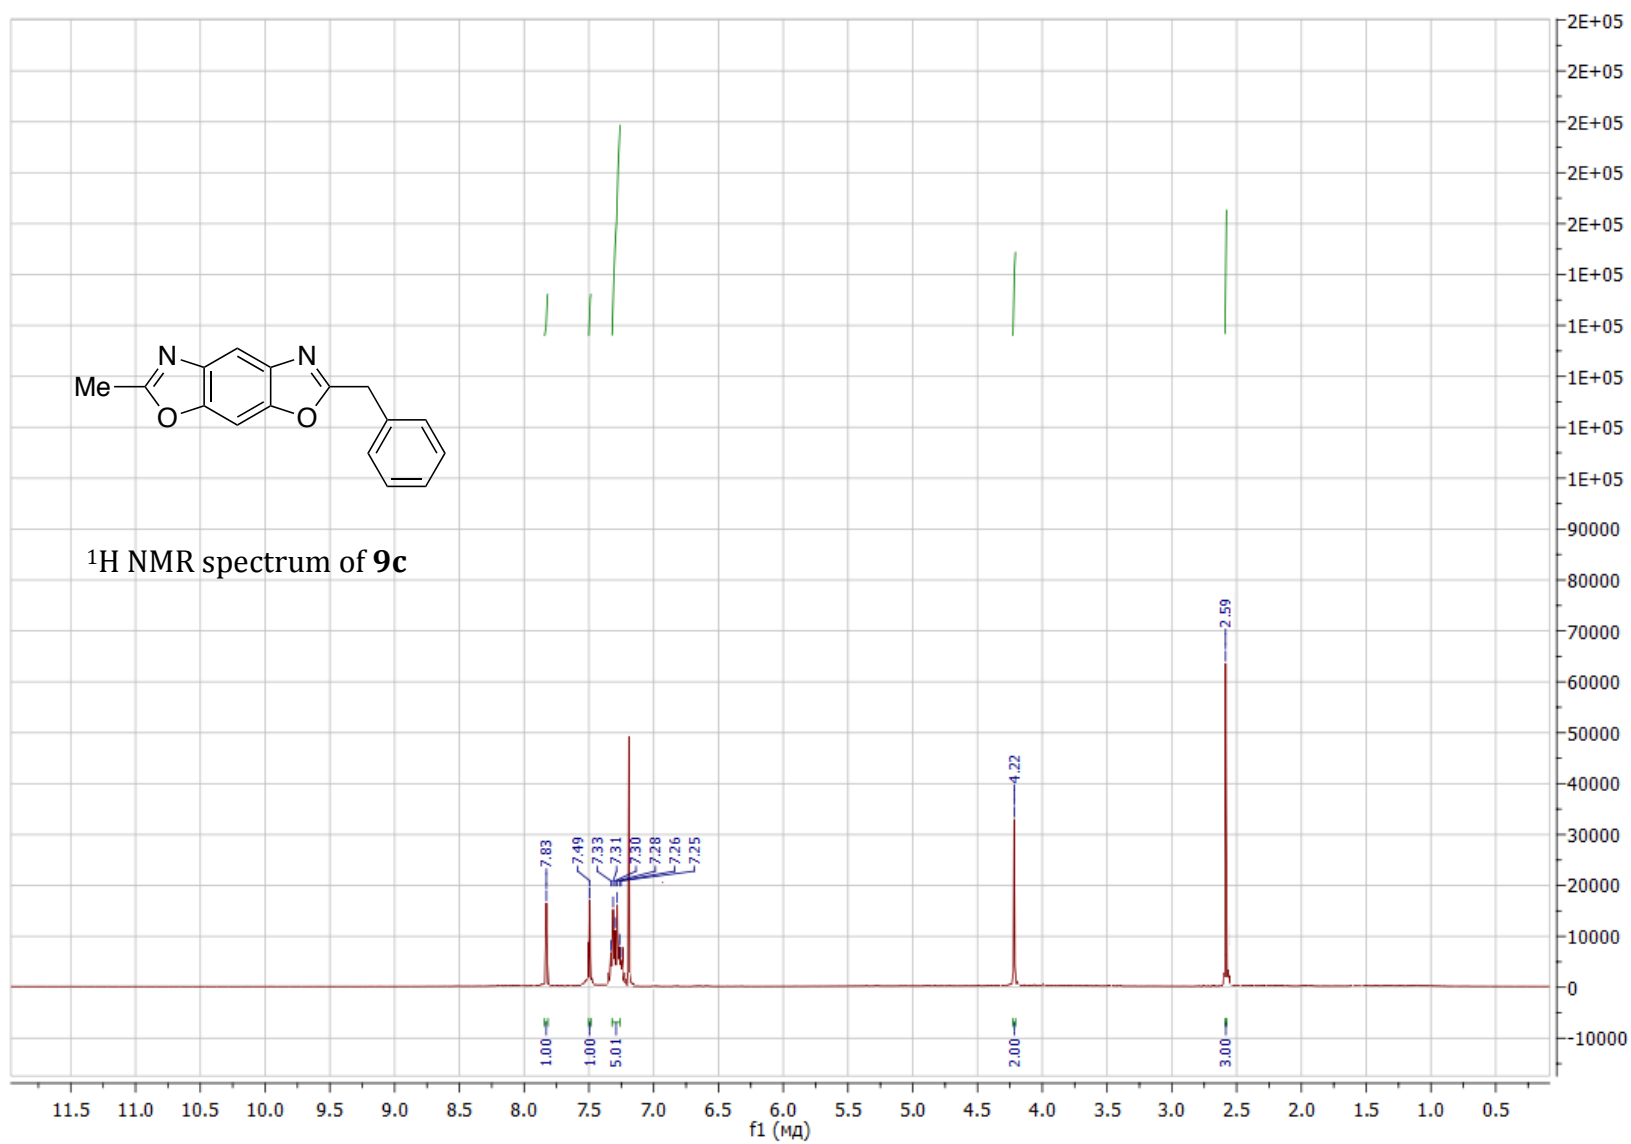



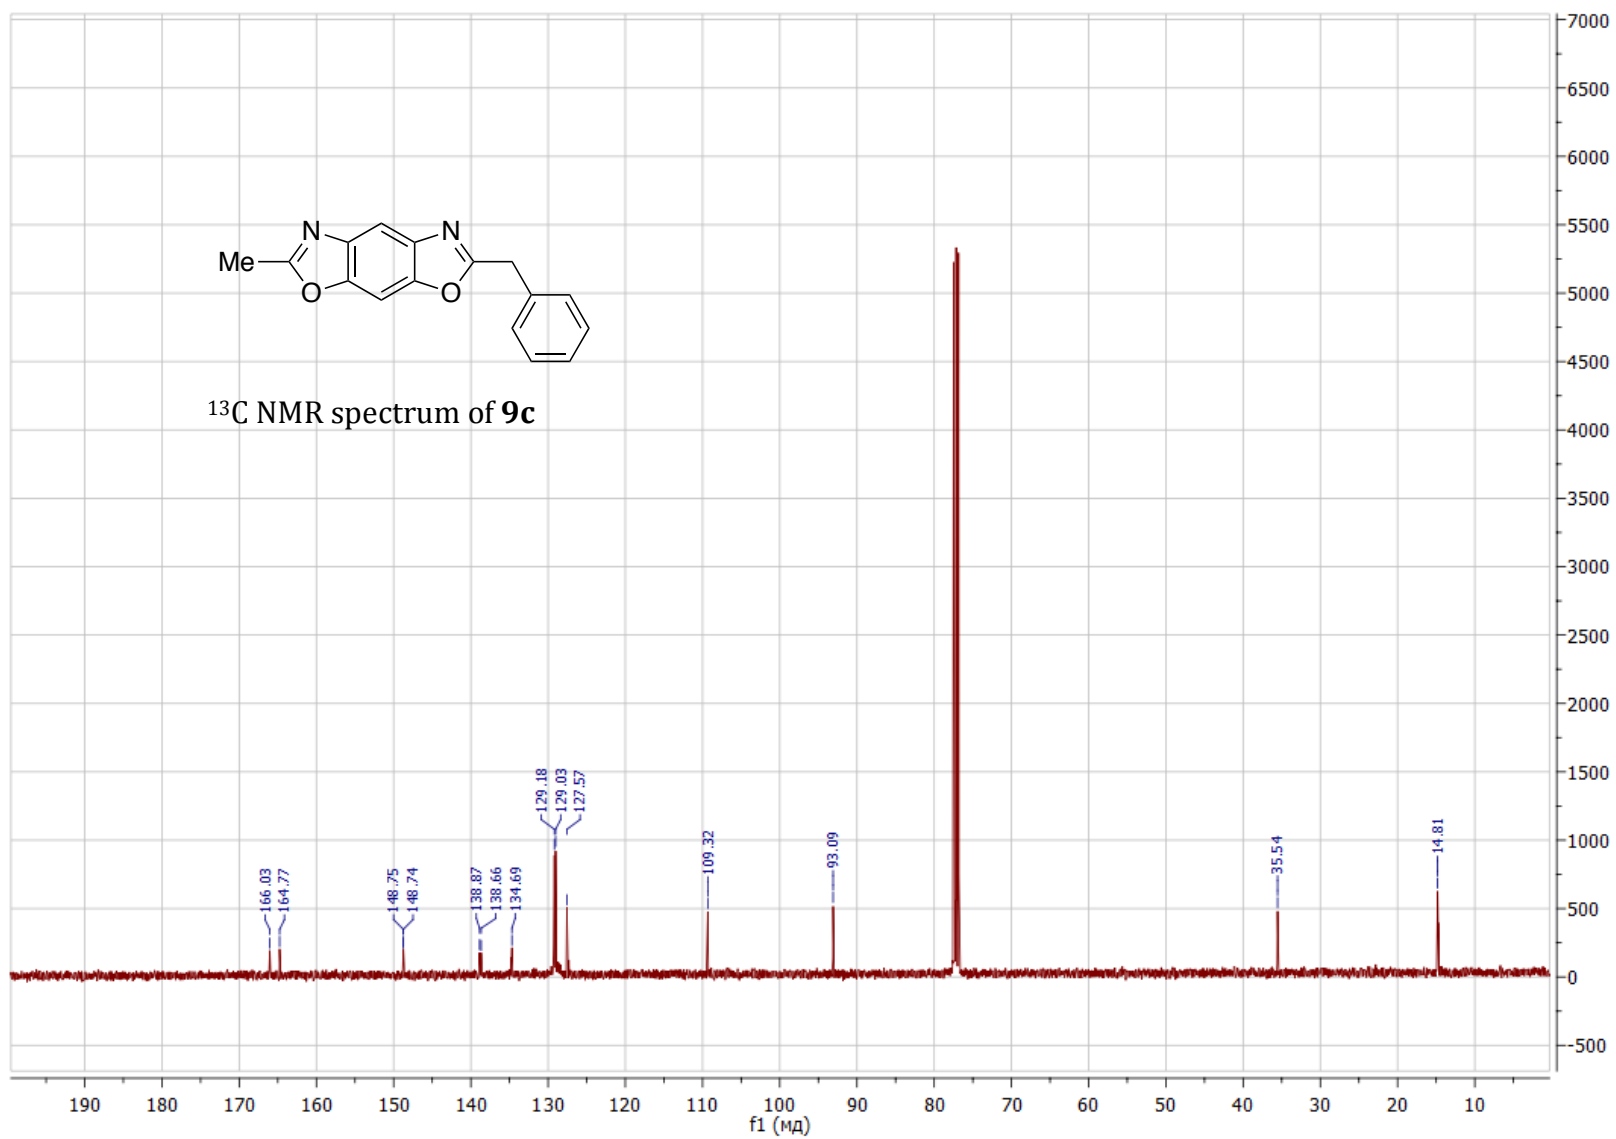

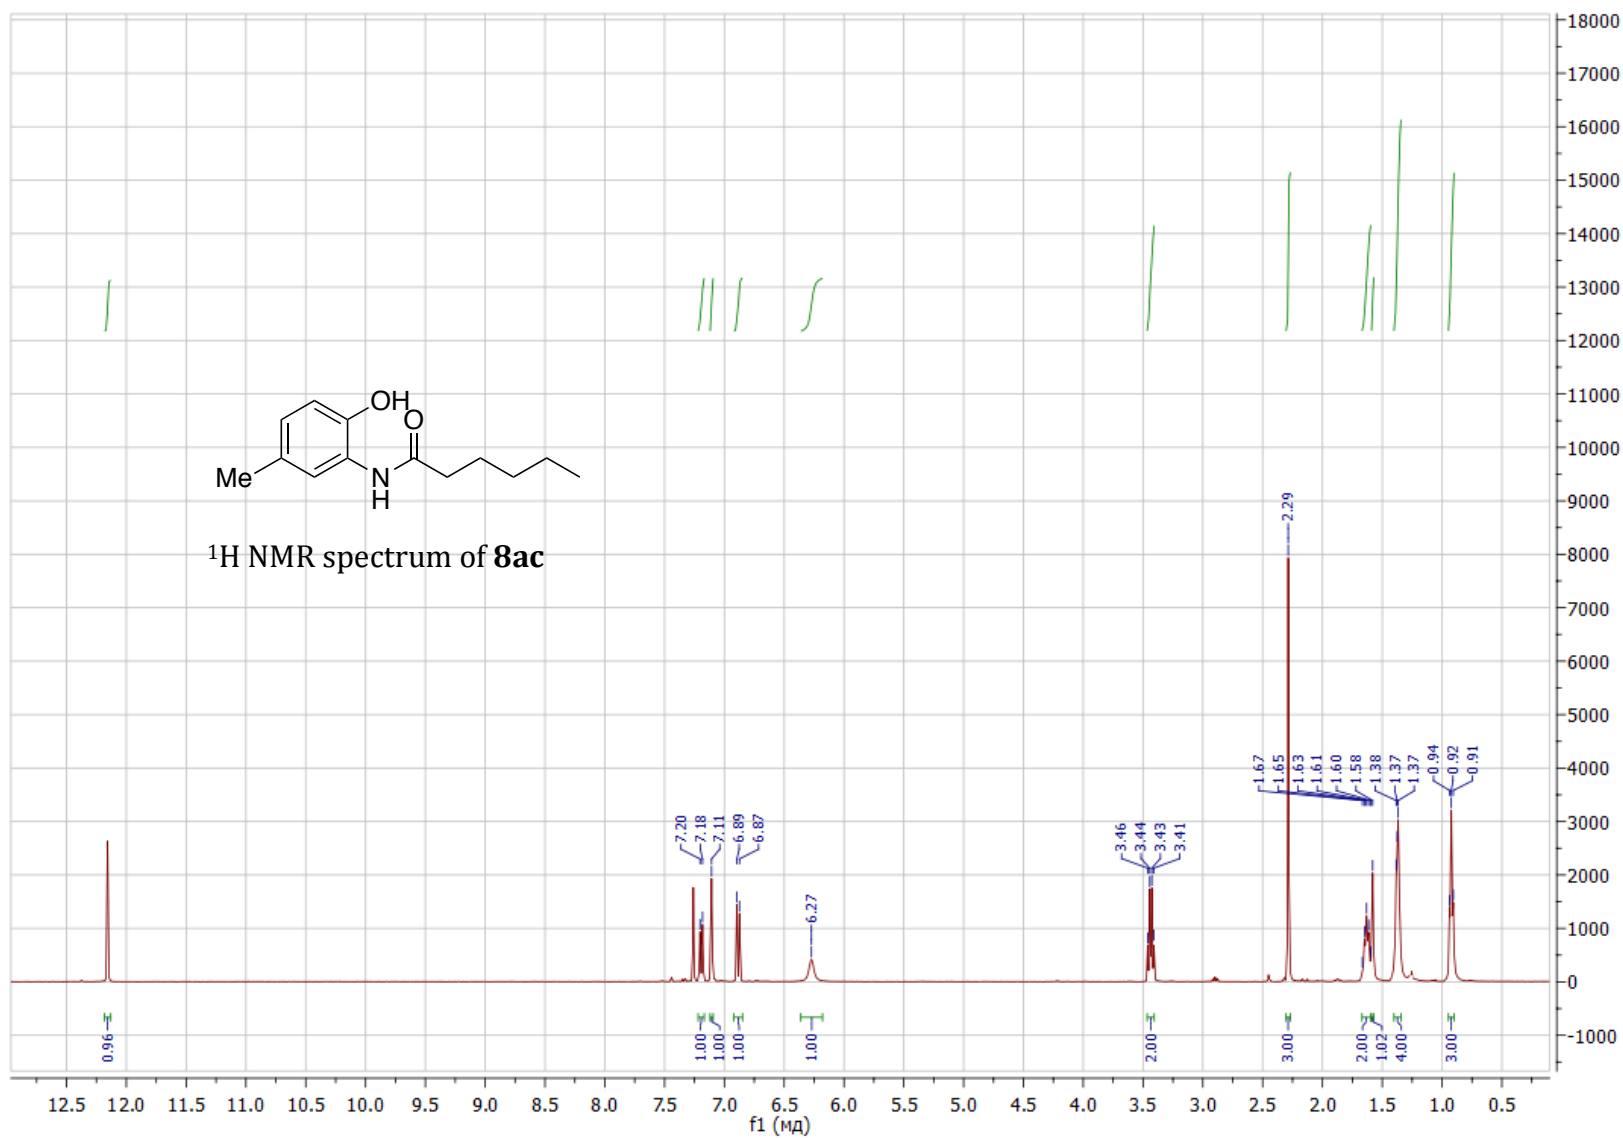

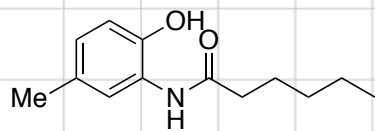

$^{13}\text{C}$  NMR spectrum of **8ac**

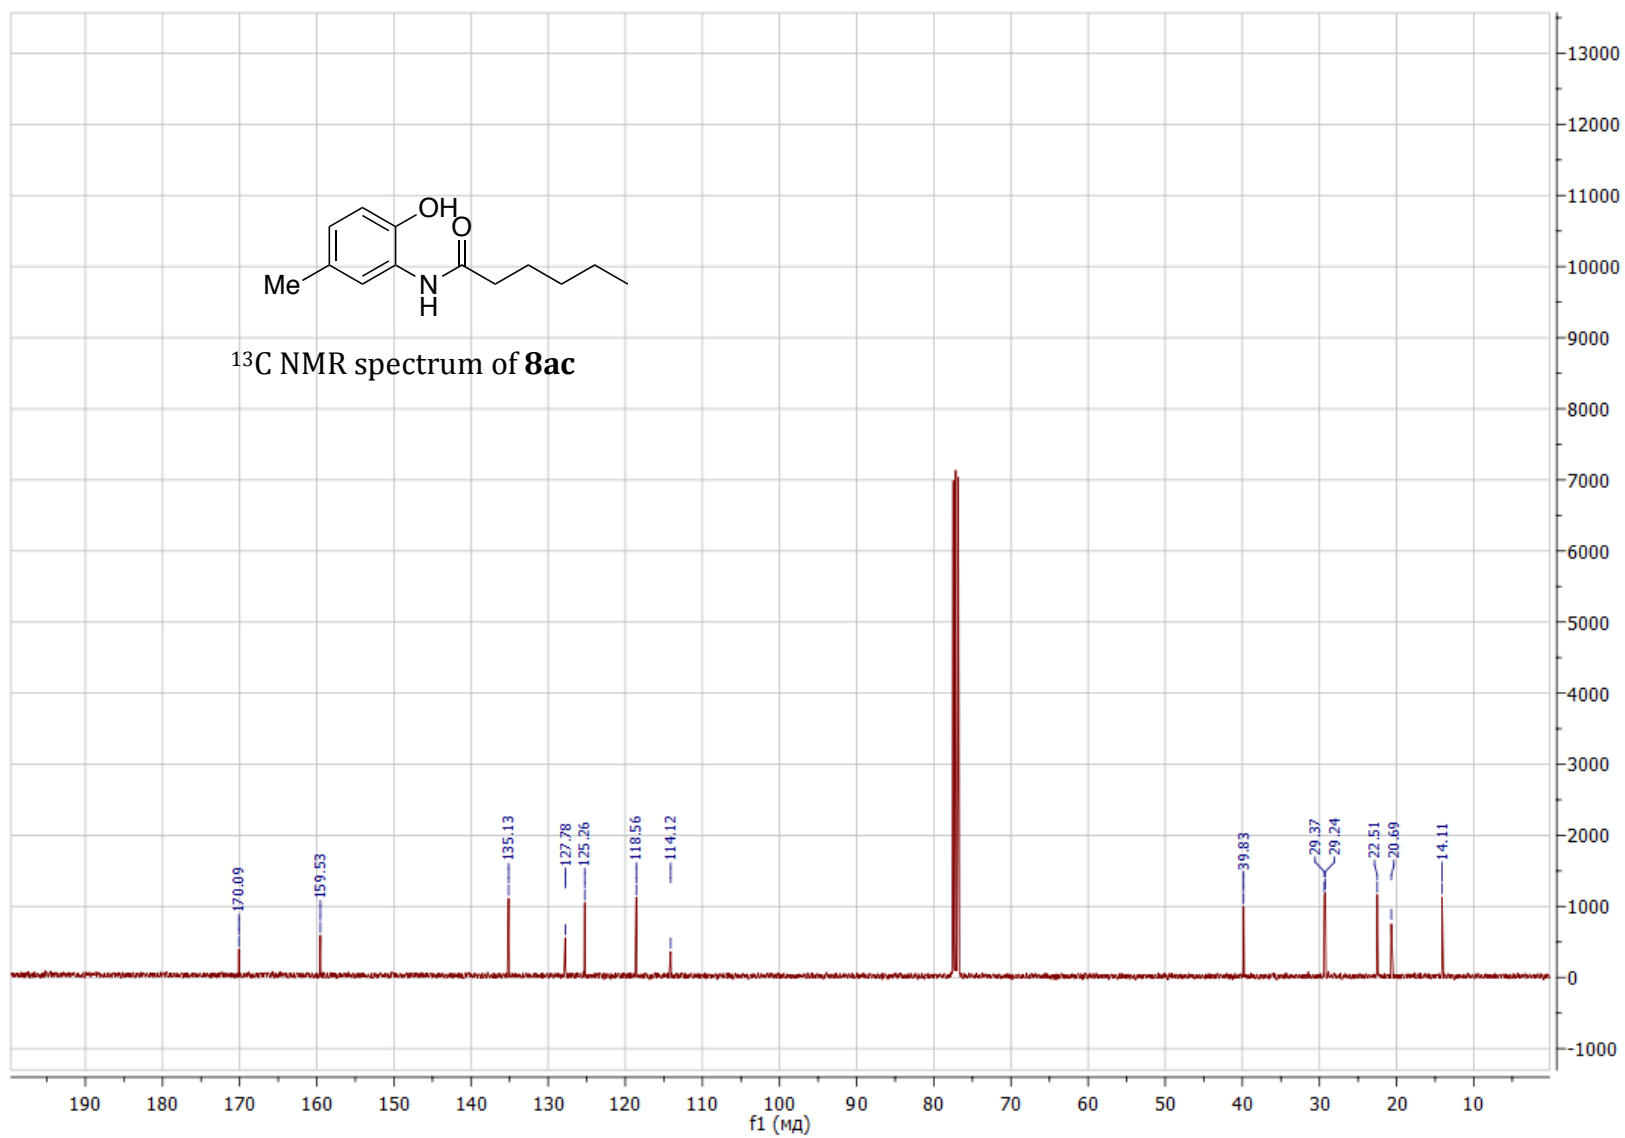

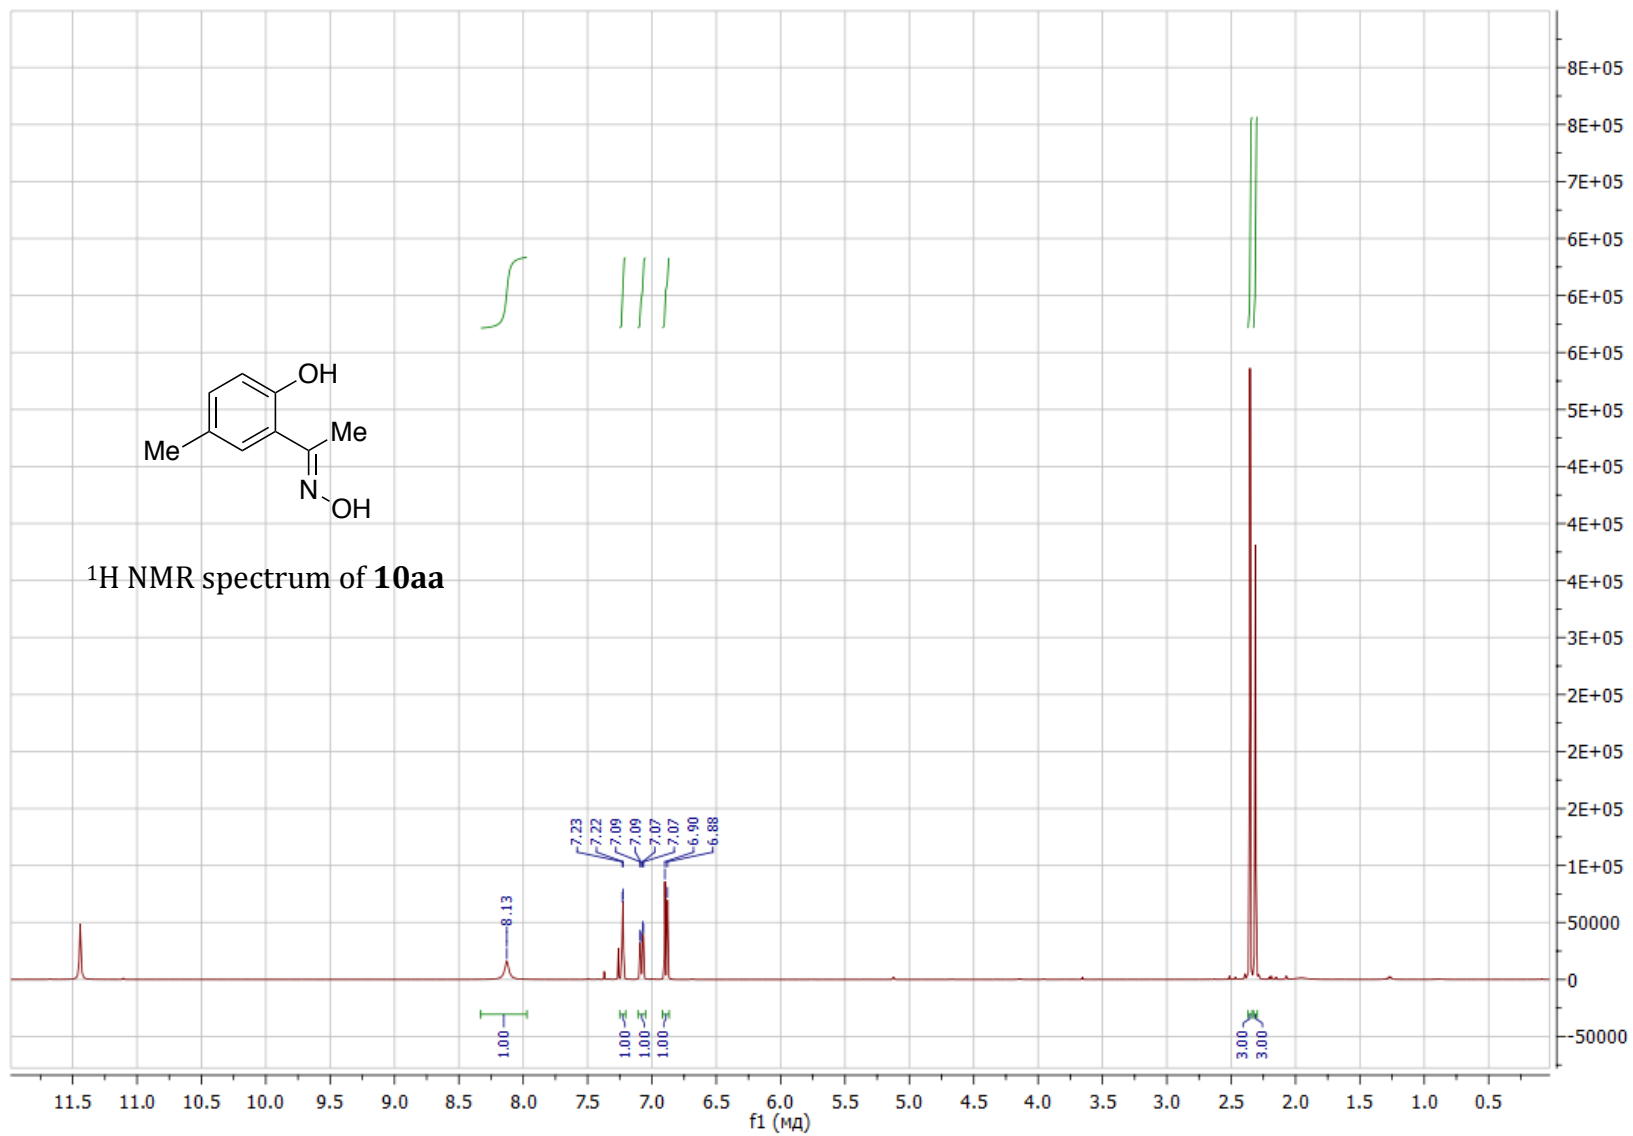

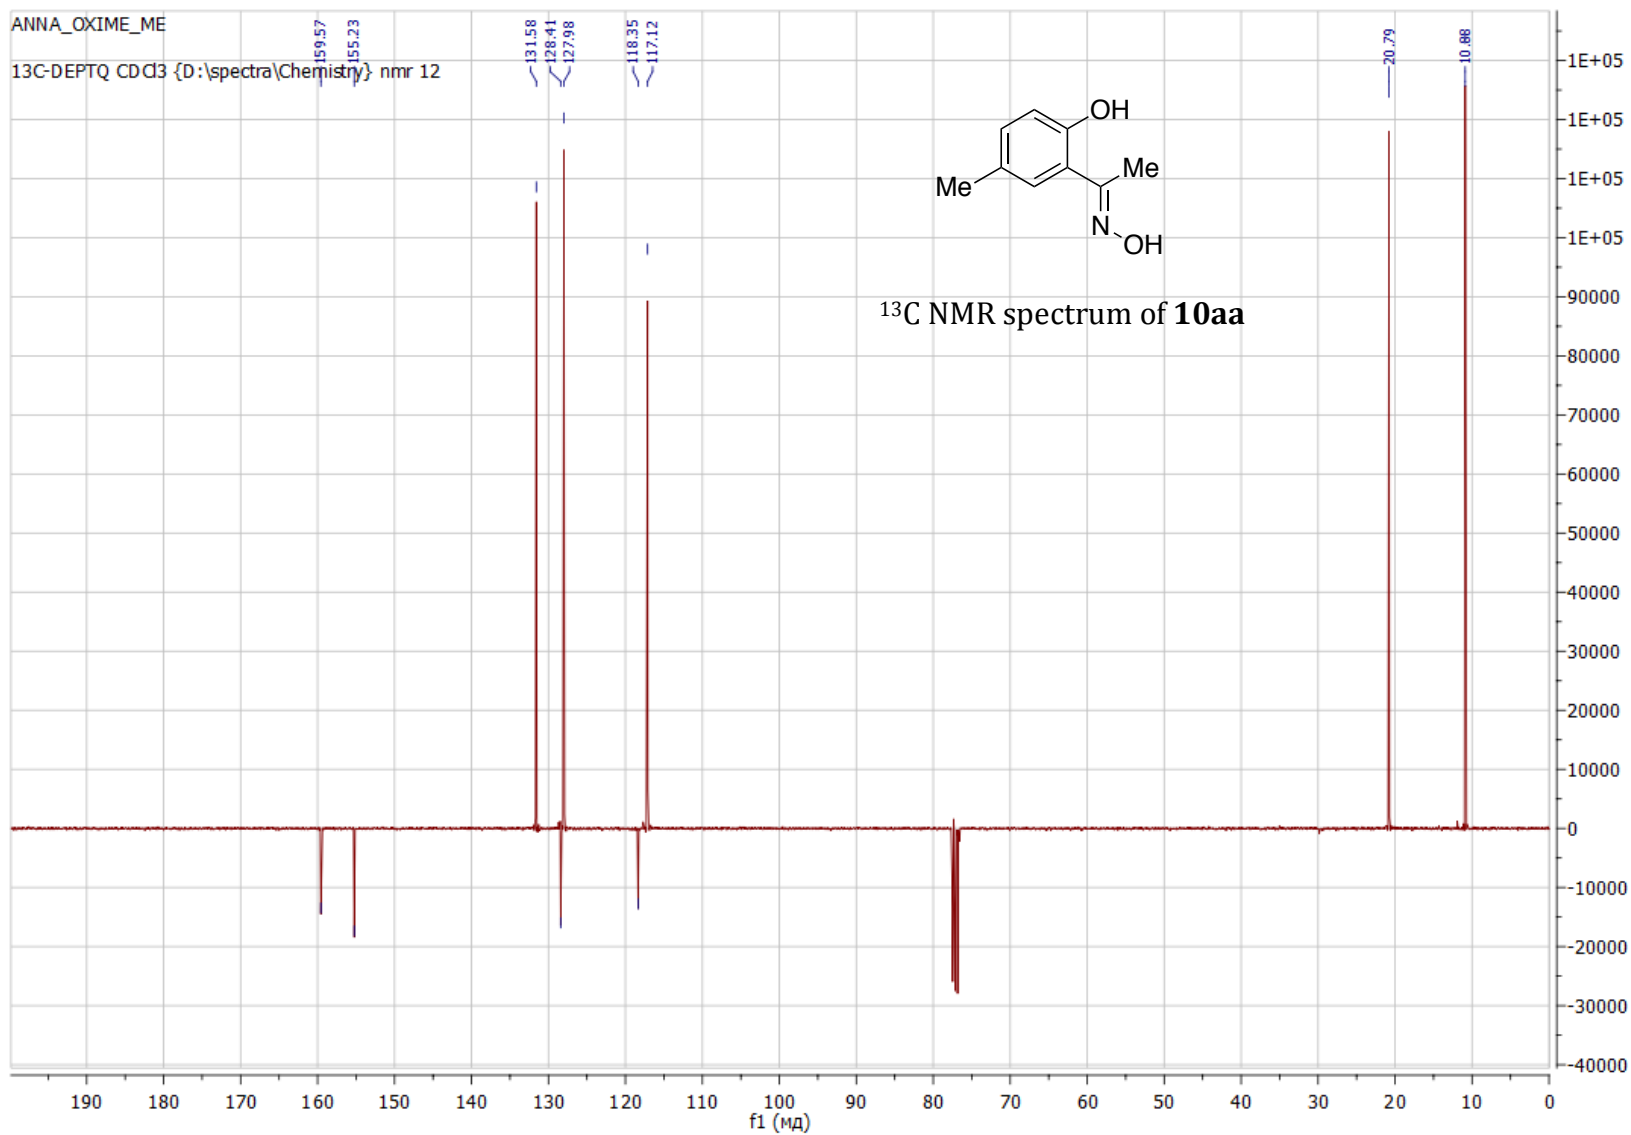

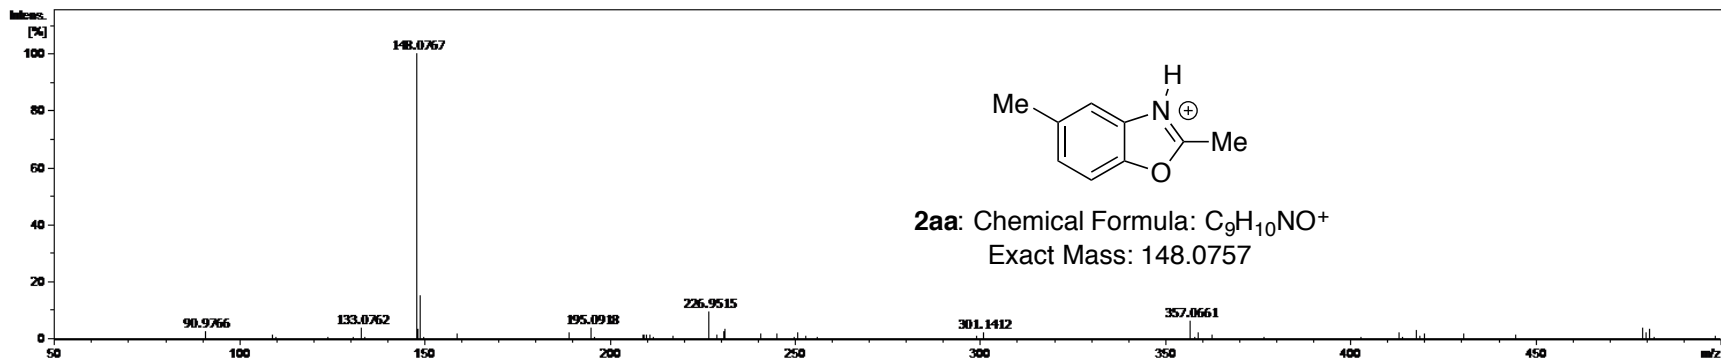

### HRMS (ES TOF) Spectral Charts

**NA034**

L052945 25 (2.582)

1: TOF MS ES+  
22.3

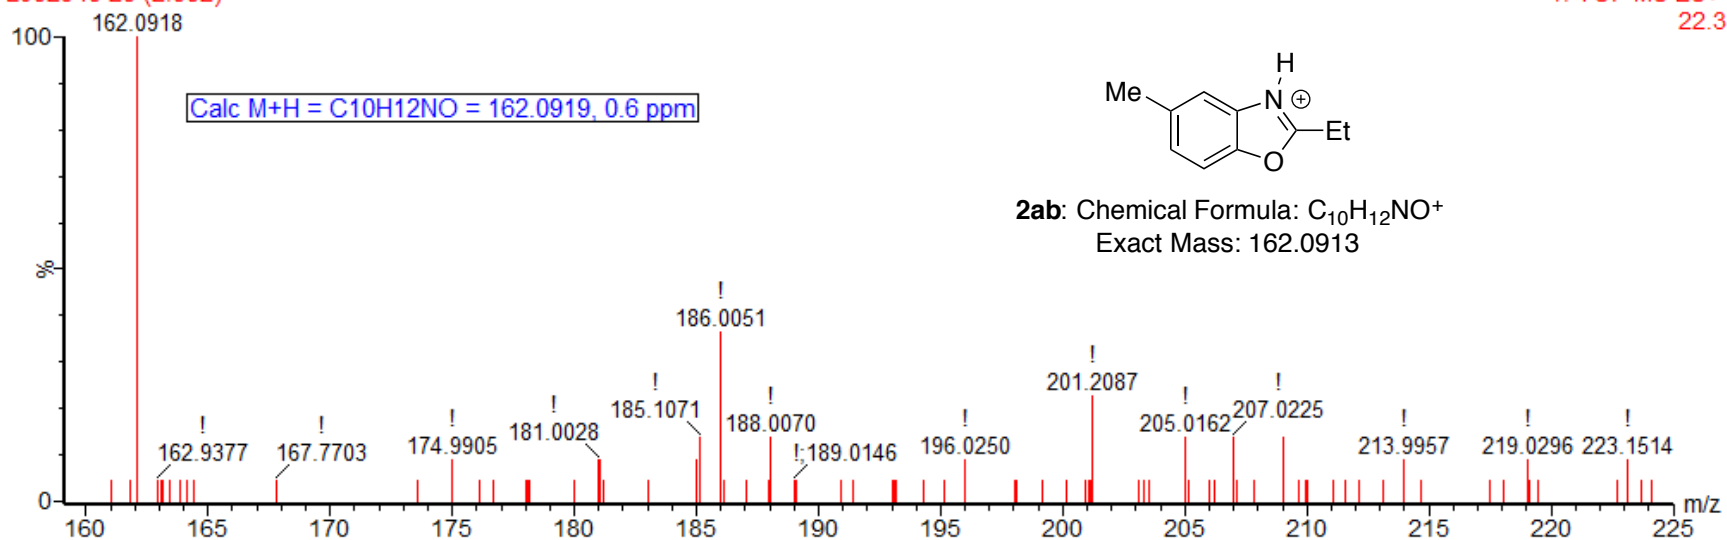

NA064

L052949 22 (2.236)

1: TOF MS ES+  
44.0

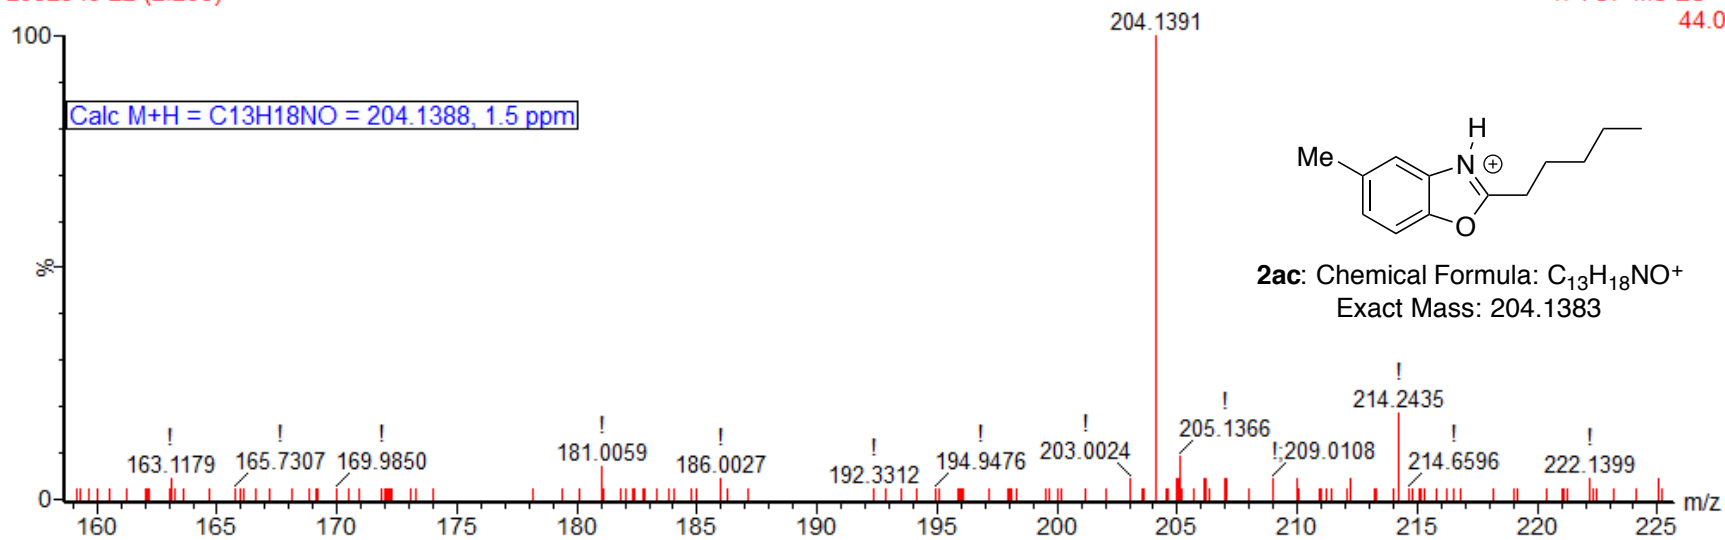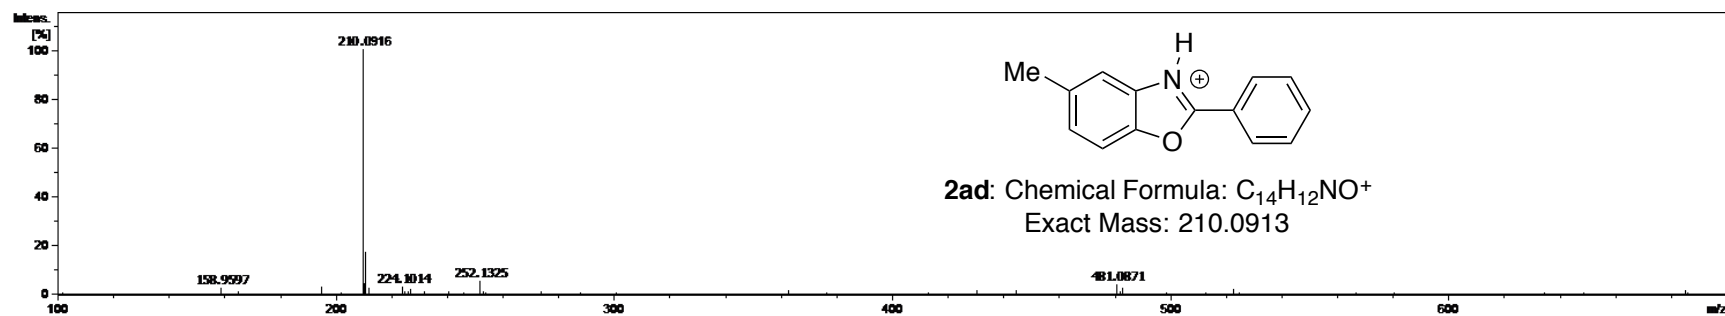

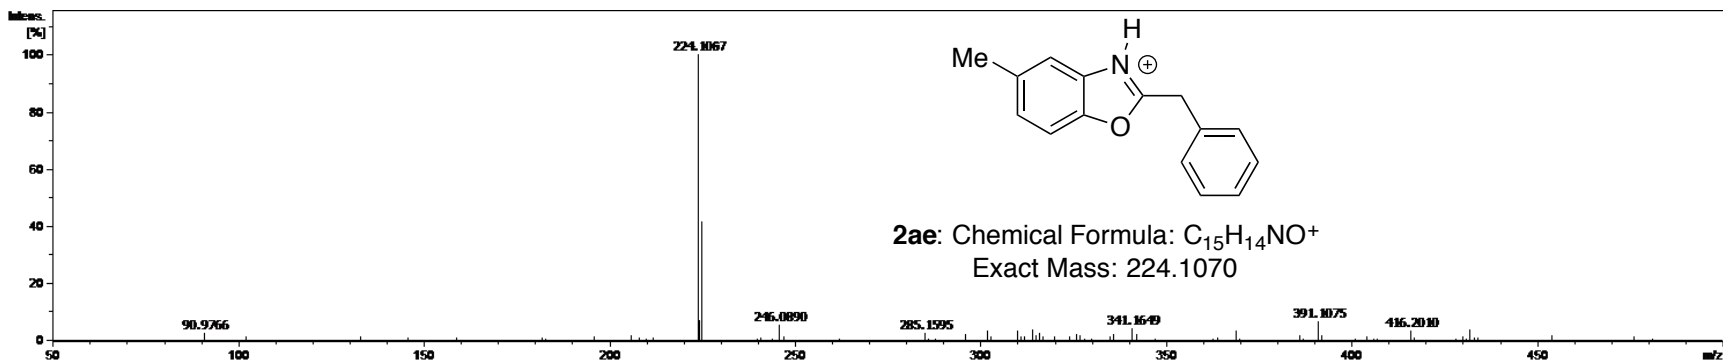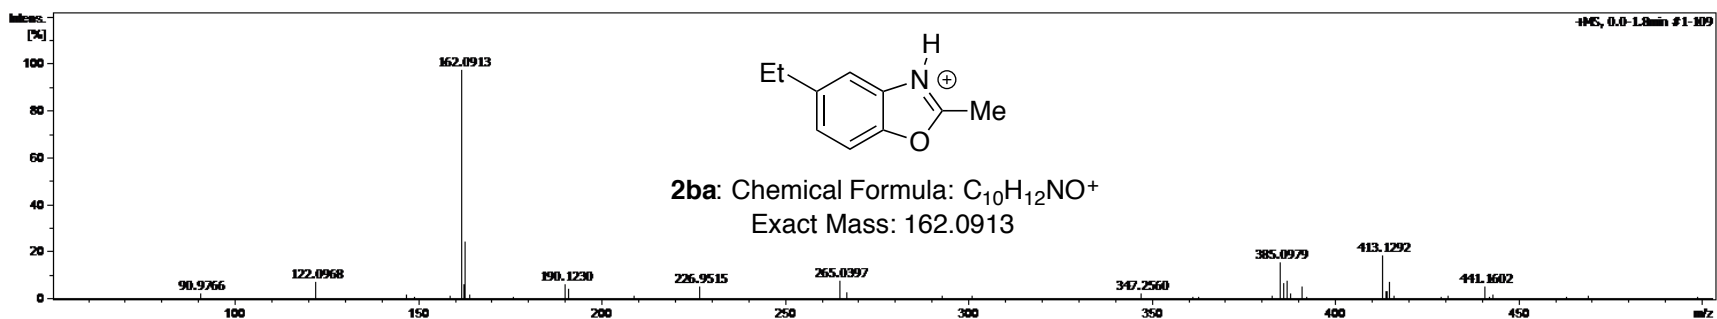

Compound Spectra

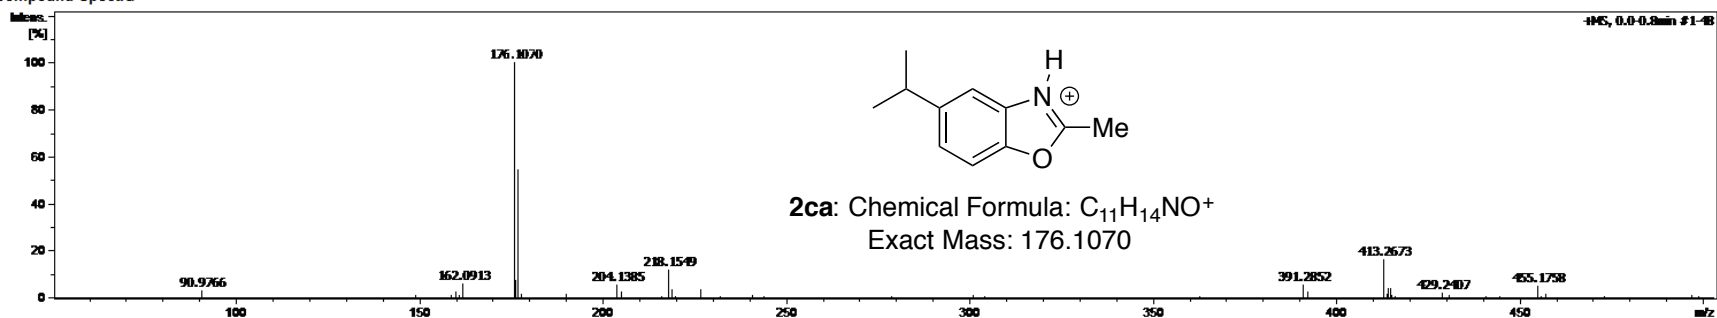



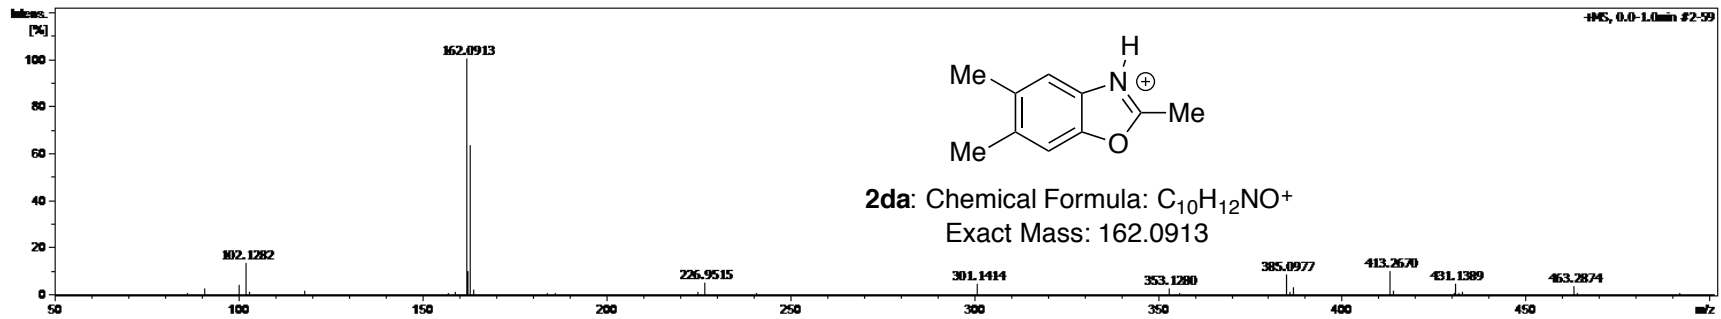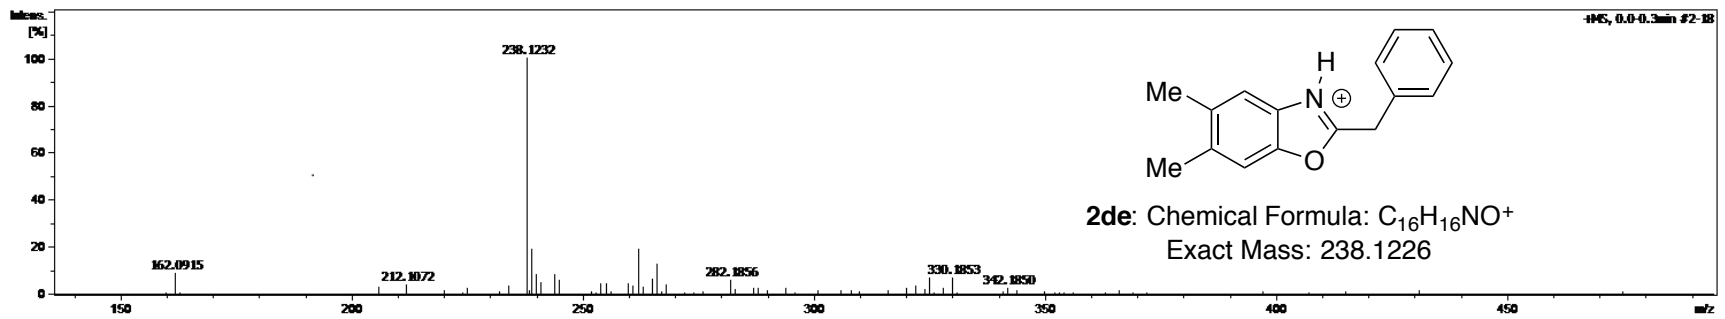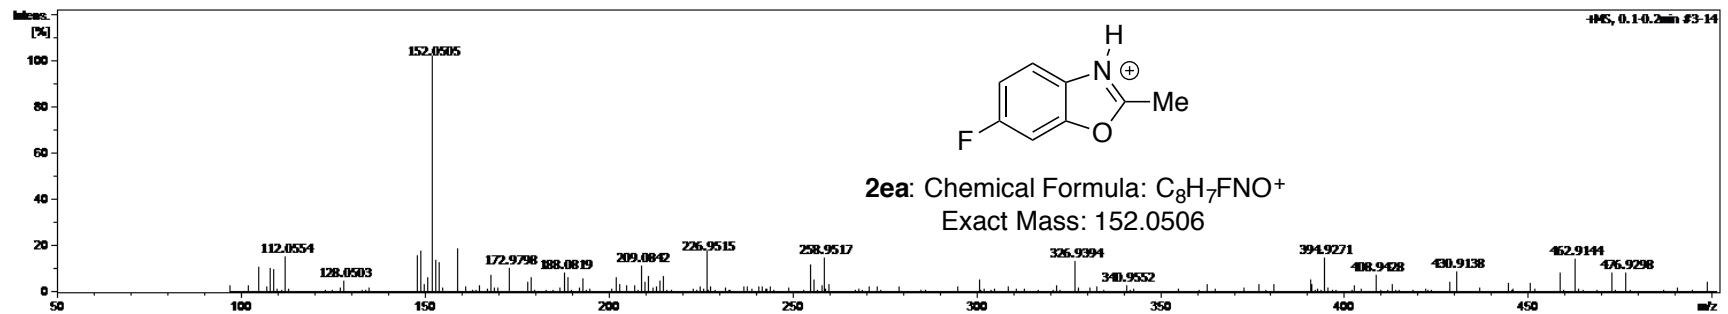

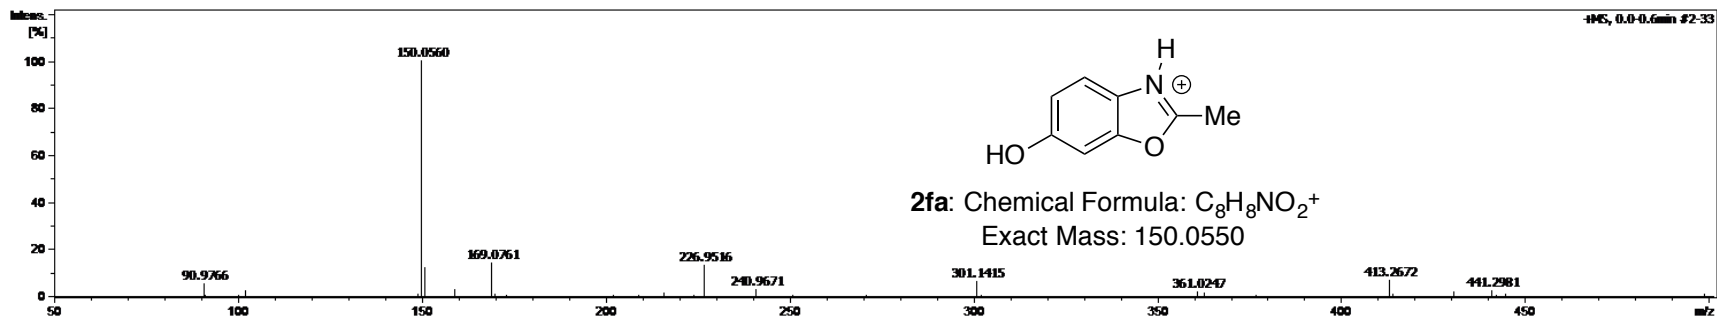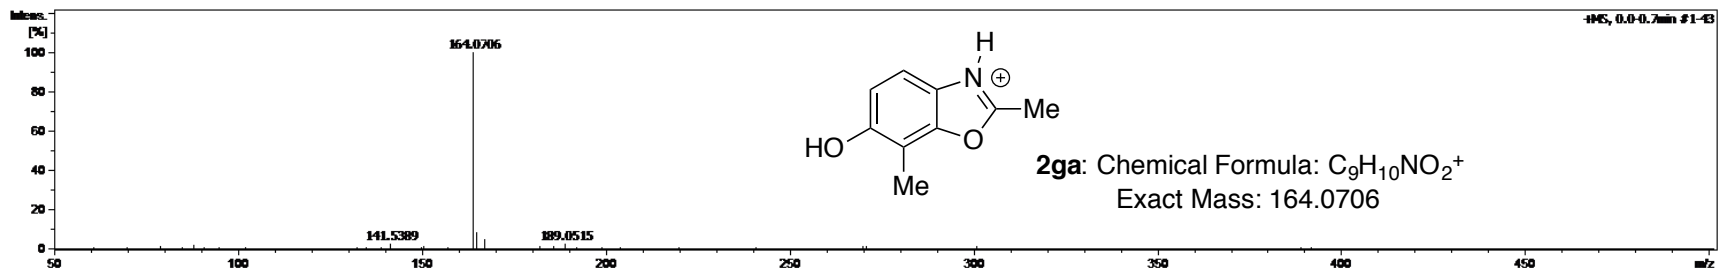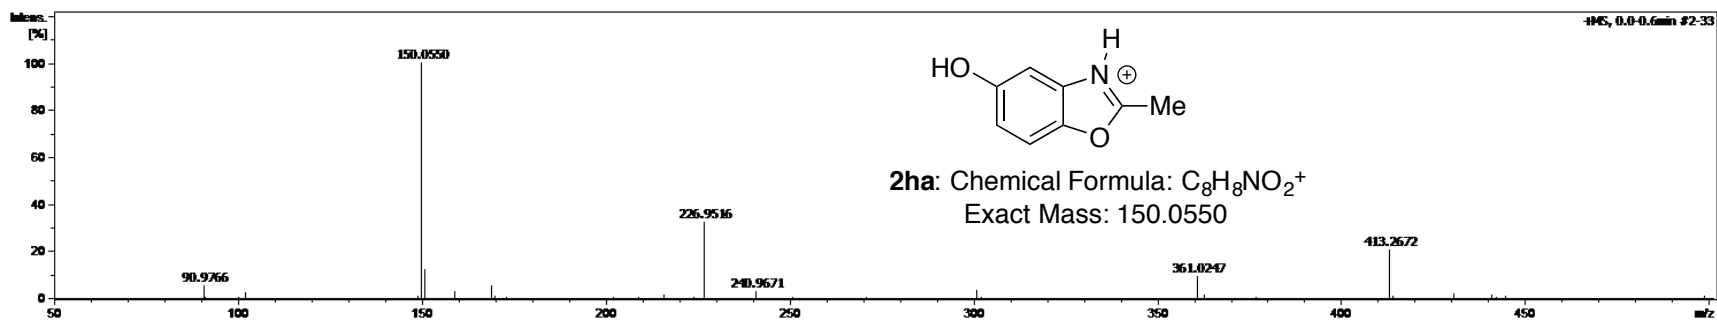

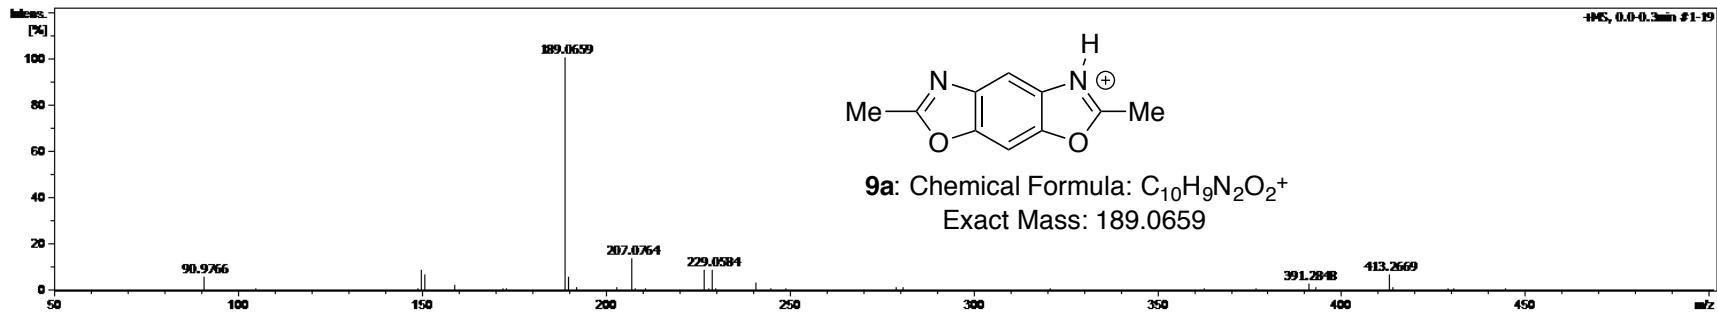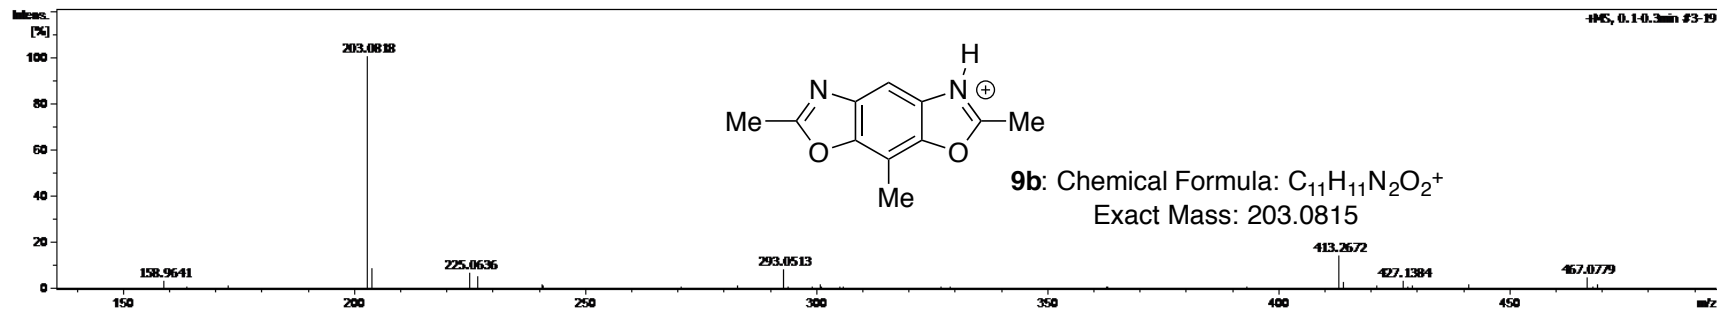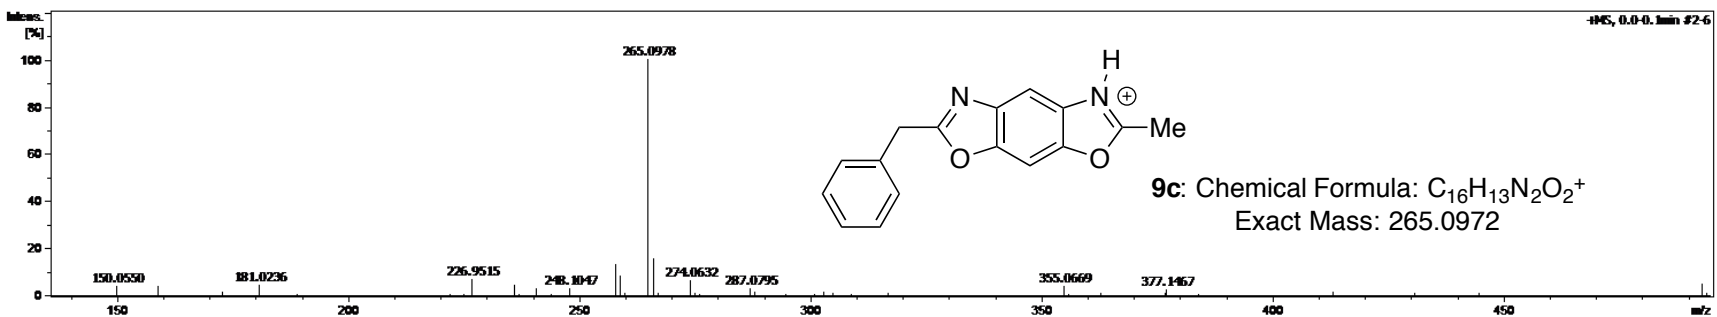

NA042

L052947 33 (3.409)

1: TOF MS ES+  
28.1

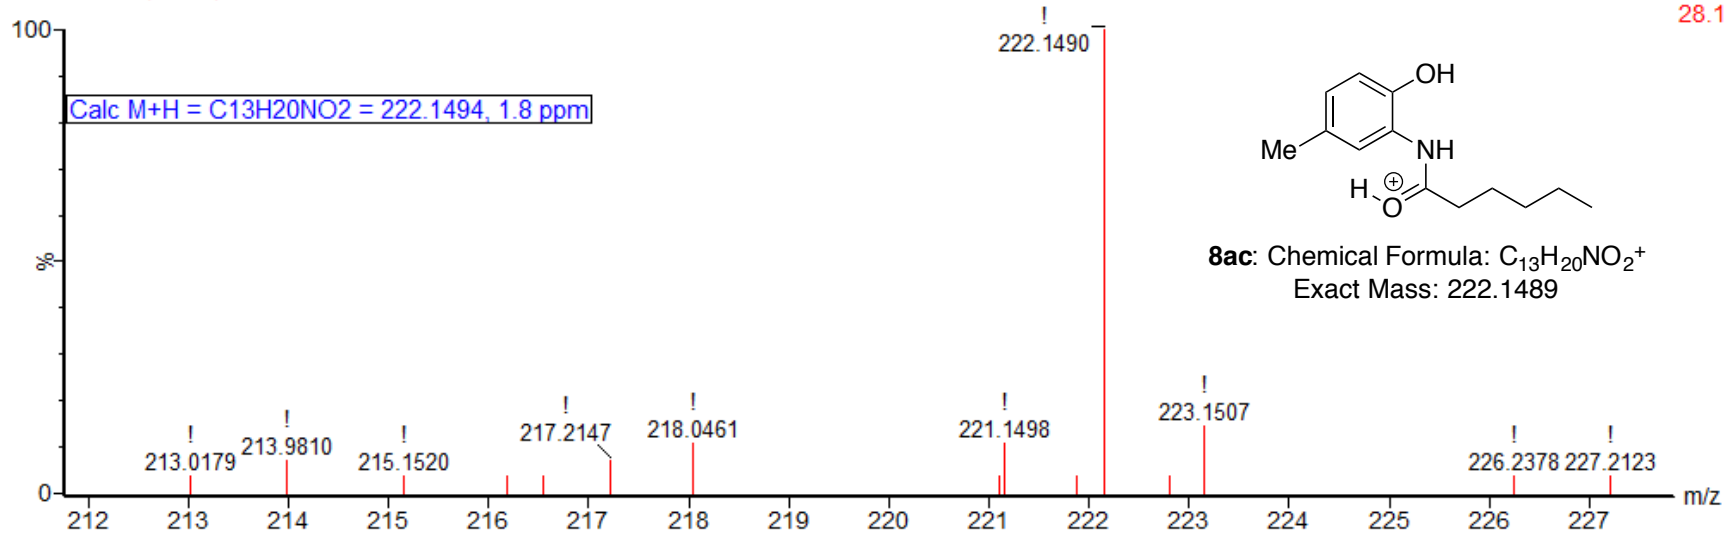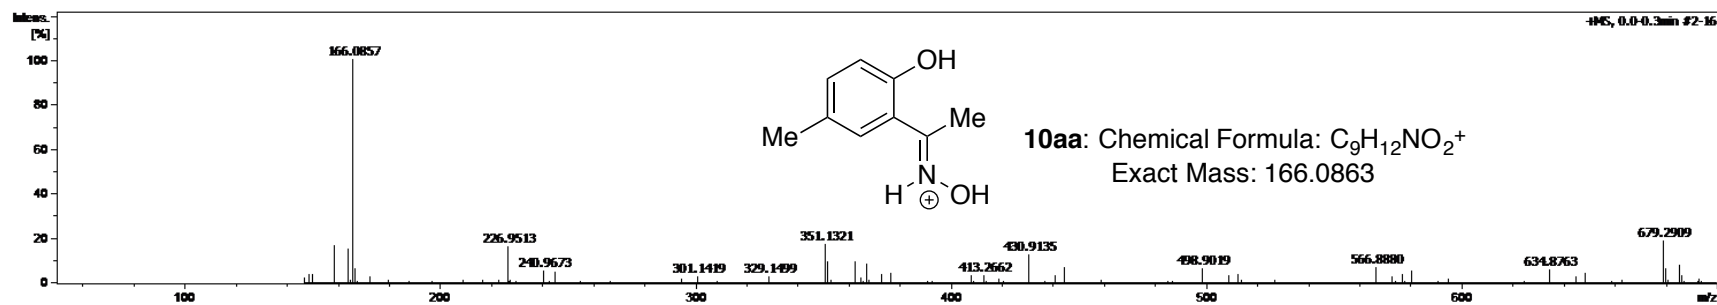

## ORTEP Drawings of Crystal Structures

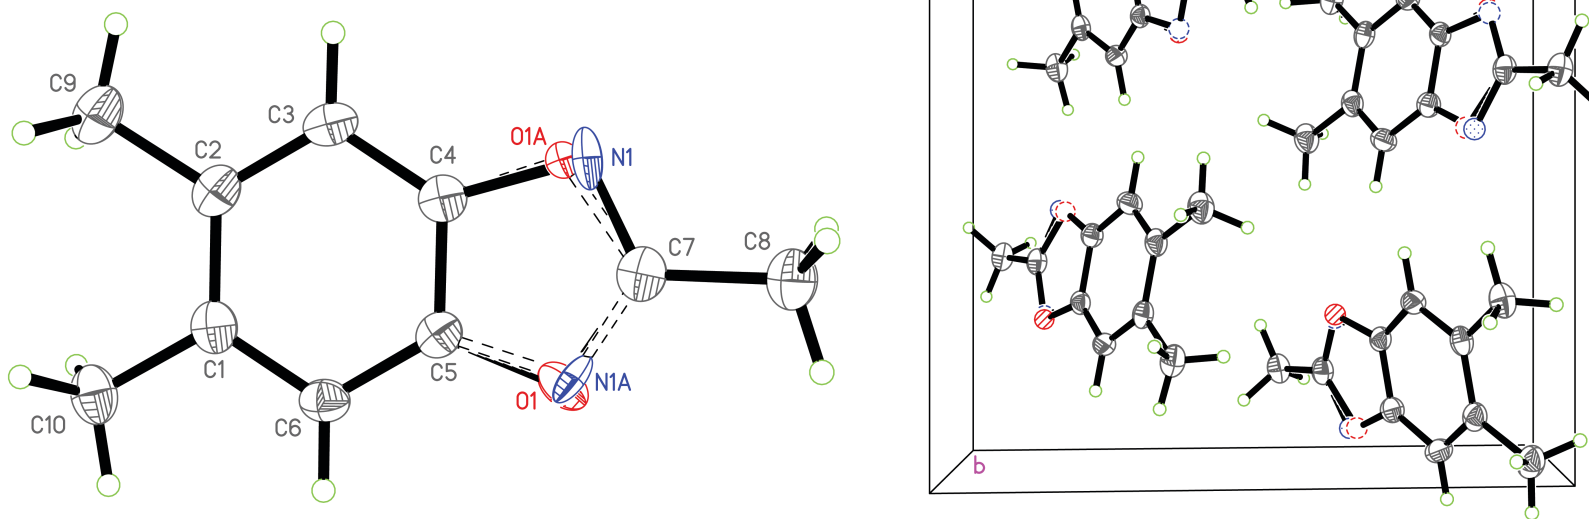

**Figure 1.** ORTEP drawing of 2,5,6-trimethylbenzo[d]oxazole (**2da**) showing 50% probability amplitude displacement ellipsoids. Oxygen and nitrogen atoms are shown disordered as this planar molecule can pack in two different ways occupying practically the same space in the crystalline lattice. Packing of the molecules in crystalline lattice cell is also shown.

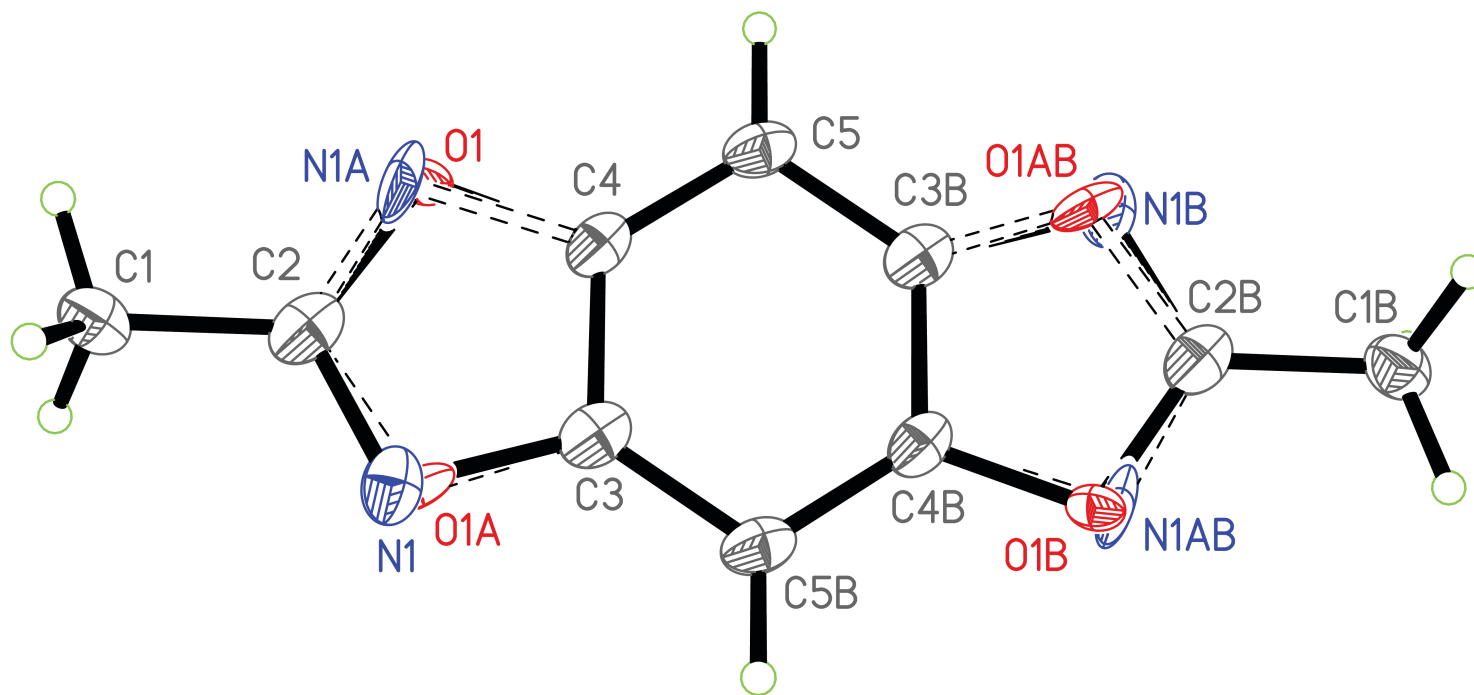

**Figure 2.** ORTEP drawing of 2,6-dimethylbenzo[1,2-d:5,4-d']bis(oxazole) (**9a**) showing 50% probability amplitude displacement ellipsoids. Oxygen and nitrogen atoms are shown disordered as this planar molecule can pack in two different ways occupying practically the same space in the crystalline lattice.

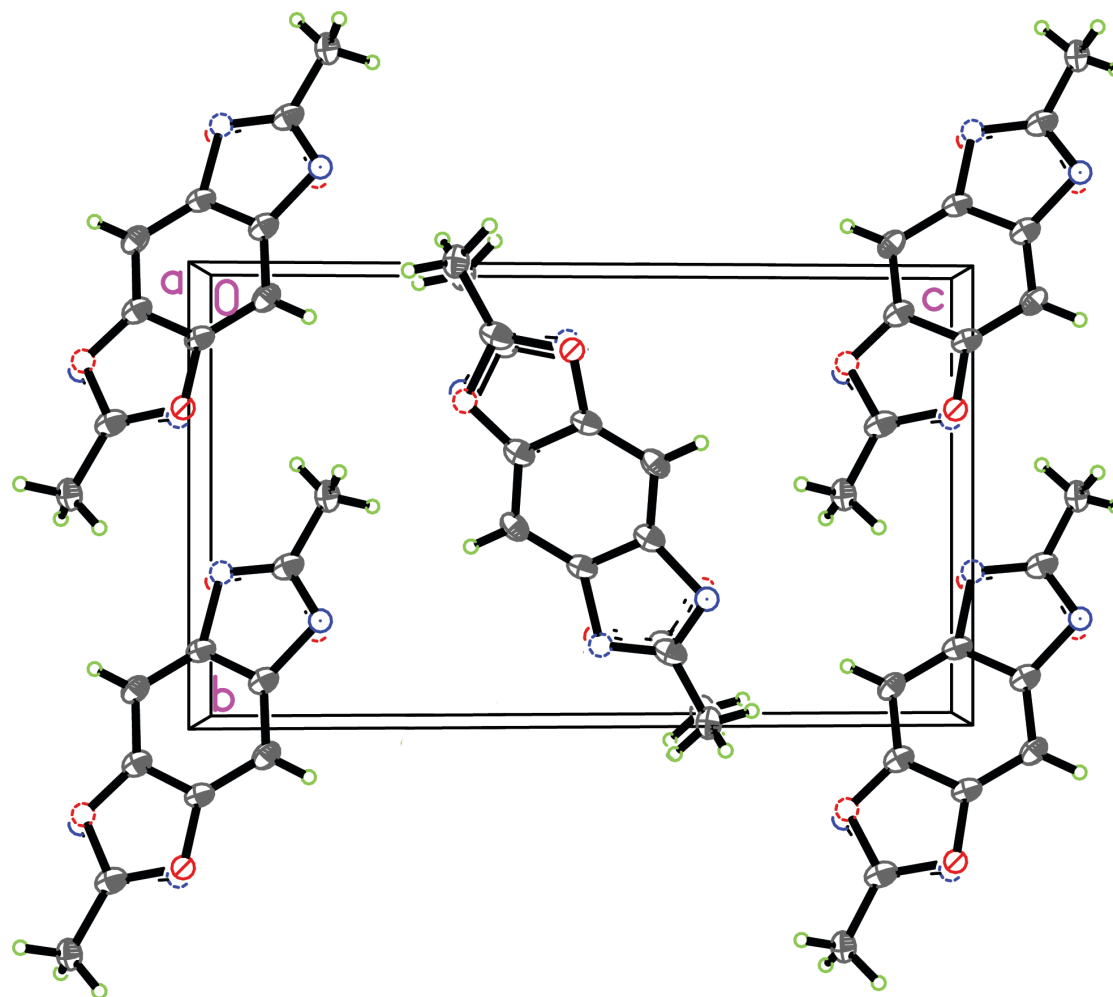

**Figure 3.** Packing of the molecules of 2,6-dimethylbenzo[1,2-d:5,4-d']bis(oxazole) (**9a**) in crystalline lattice cell is also shown.
